# Supplementary material for: Mouse aging cell atlas analysis reveals global and cell type-specific aging signatures
Source: eLife journal article supplement (doi:10.7554/elife.62293), 2021-04-12
Supplement: supp [file elife-62293-supp-v1.zip]

**A**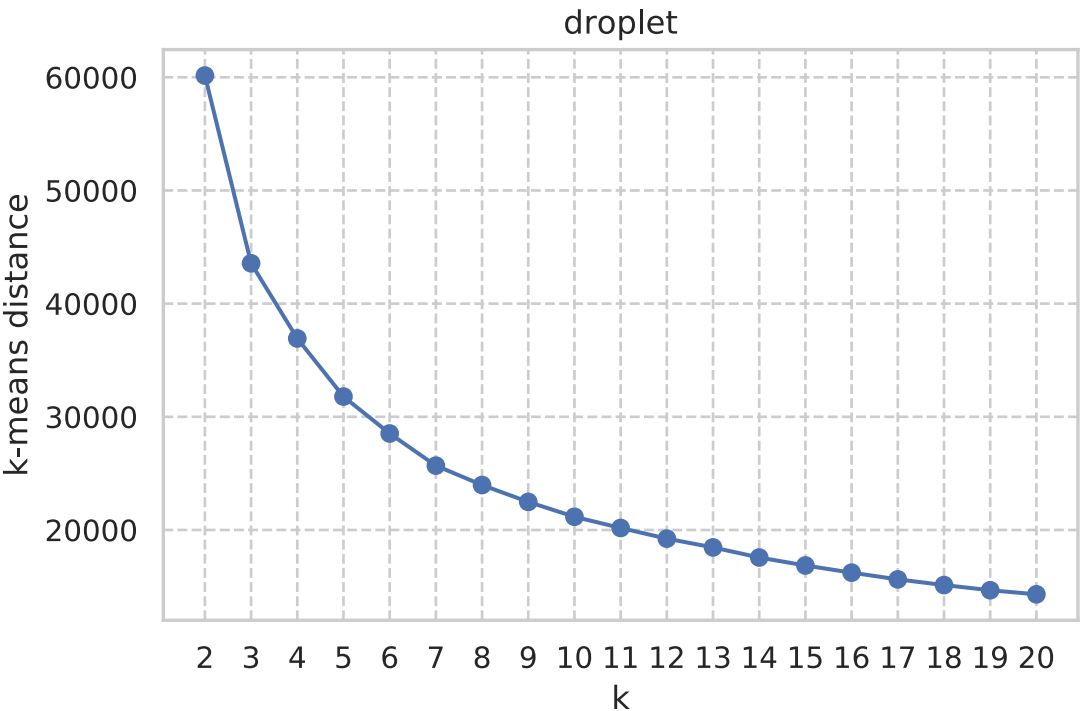**B**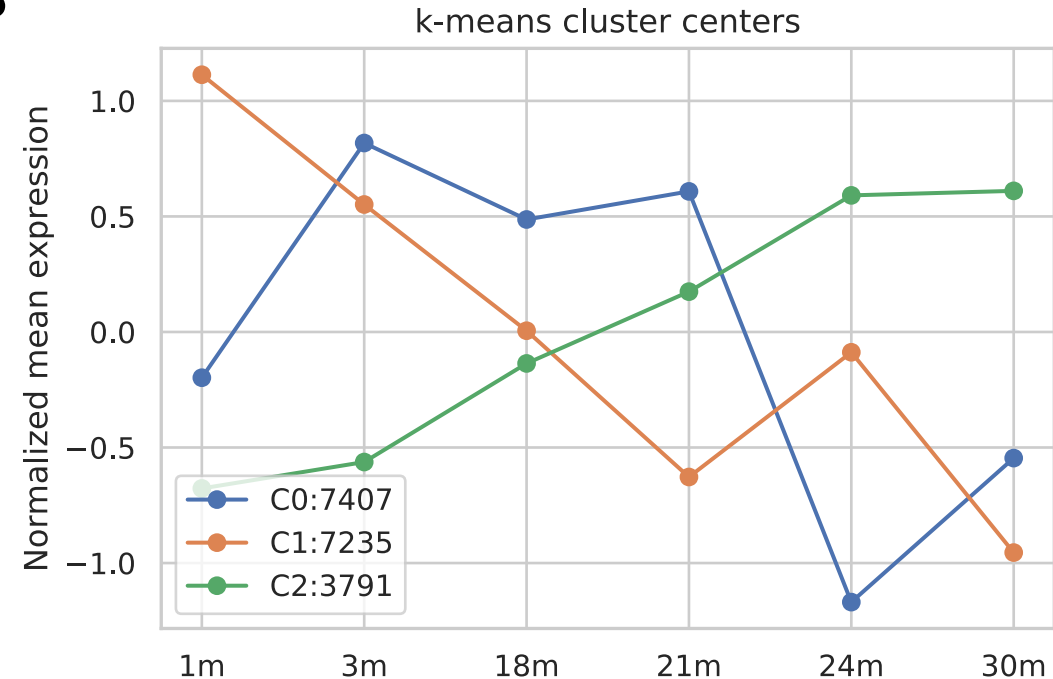**C**

Number of genes in each cluster

|                                                                  |      |      |      |
|------------------------------------------------------------------|------|------|------|
| Bladder.bladder cell                                             | 3    | 1575 | 12   |
| Bladder.bladder urothelial cell                                  | 0    | 460  | 0    |
| Kidney.kidney loop of Henle thick ascending limb epithelial cell | 457  | 24   | 3    |
| Kidney.kidney proximal convoluted tubule epithelial cell         | 646  | 62   | 4    |
| Limb_Muscle.B cell                                               | 25   | 180  | 313  |
| Limb_Muscle.T cell                                               | 15   | 159  | 281  |
| Limb_Muscle.endothelial cell                                     | 30   | 245  | 151  |
| Limb_Muscle.macrophage                                           | 53   | 458  | 145  |
| Limb_Muscle.mesenchymal stem cell                                | 55   | 565  | 193  |
| Limb_Muscle.skeletal muscle satellite cell                       | 61   | 823  | 142  |
| Liver.Kupffer cell                                               | 427  | 351  | 1674 |
| Liver.hepatocyte                                                 | 122  | 558  | 293  |
| Lung.NK cell                                                     | 143  | 4    | 4    |
| Lung.alveolar macrophage                                         | 602  | 15   | 10   |
| Lung.classical monocyte                                          | 843  | 34   | 8    |
| Mammary_Gland.B cell                                             | 631  | 0    | 0    |
| Mammary_Gland.T cell                                             | 868  | 0    | 0    |
| Mammary_Gland.stromal cell                                       | 1336 | 0    | 0    |
| Marrow.granulocyte                                               | 78   | 51   | 23   |
| Marrow.granulocytopoietic cell                                   | 855  | 443  | 93   |
| Marrow.monocyte                                                  | 76   | 181  | 55   |
| Spleen.B cell                                                    | 8    | 118  | 102  |
| Spleen.T cell                                                    | 7    | 202  | 259  |
| Thymus.thymocyte                                                 | 66   | 0    | 22   |
| Tongue.basal cell of epidermis                                   | 0    | 516  | 3    |
| Tongue.keratinocyte                                              | 0    | 211  | 1    |

C0 C1 C2

k-means clusters
