# Supplementary material for: Mouse aging cell atlas analysis reveals global and cell type-specific aging signatures
Source: eLife journal article supplement (doi:10.7554/elife.62293), 2021-04-12

**A**FACS: correlation of estimated age coefficient  
w/ and w/o CDR correction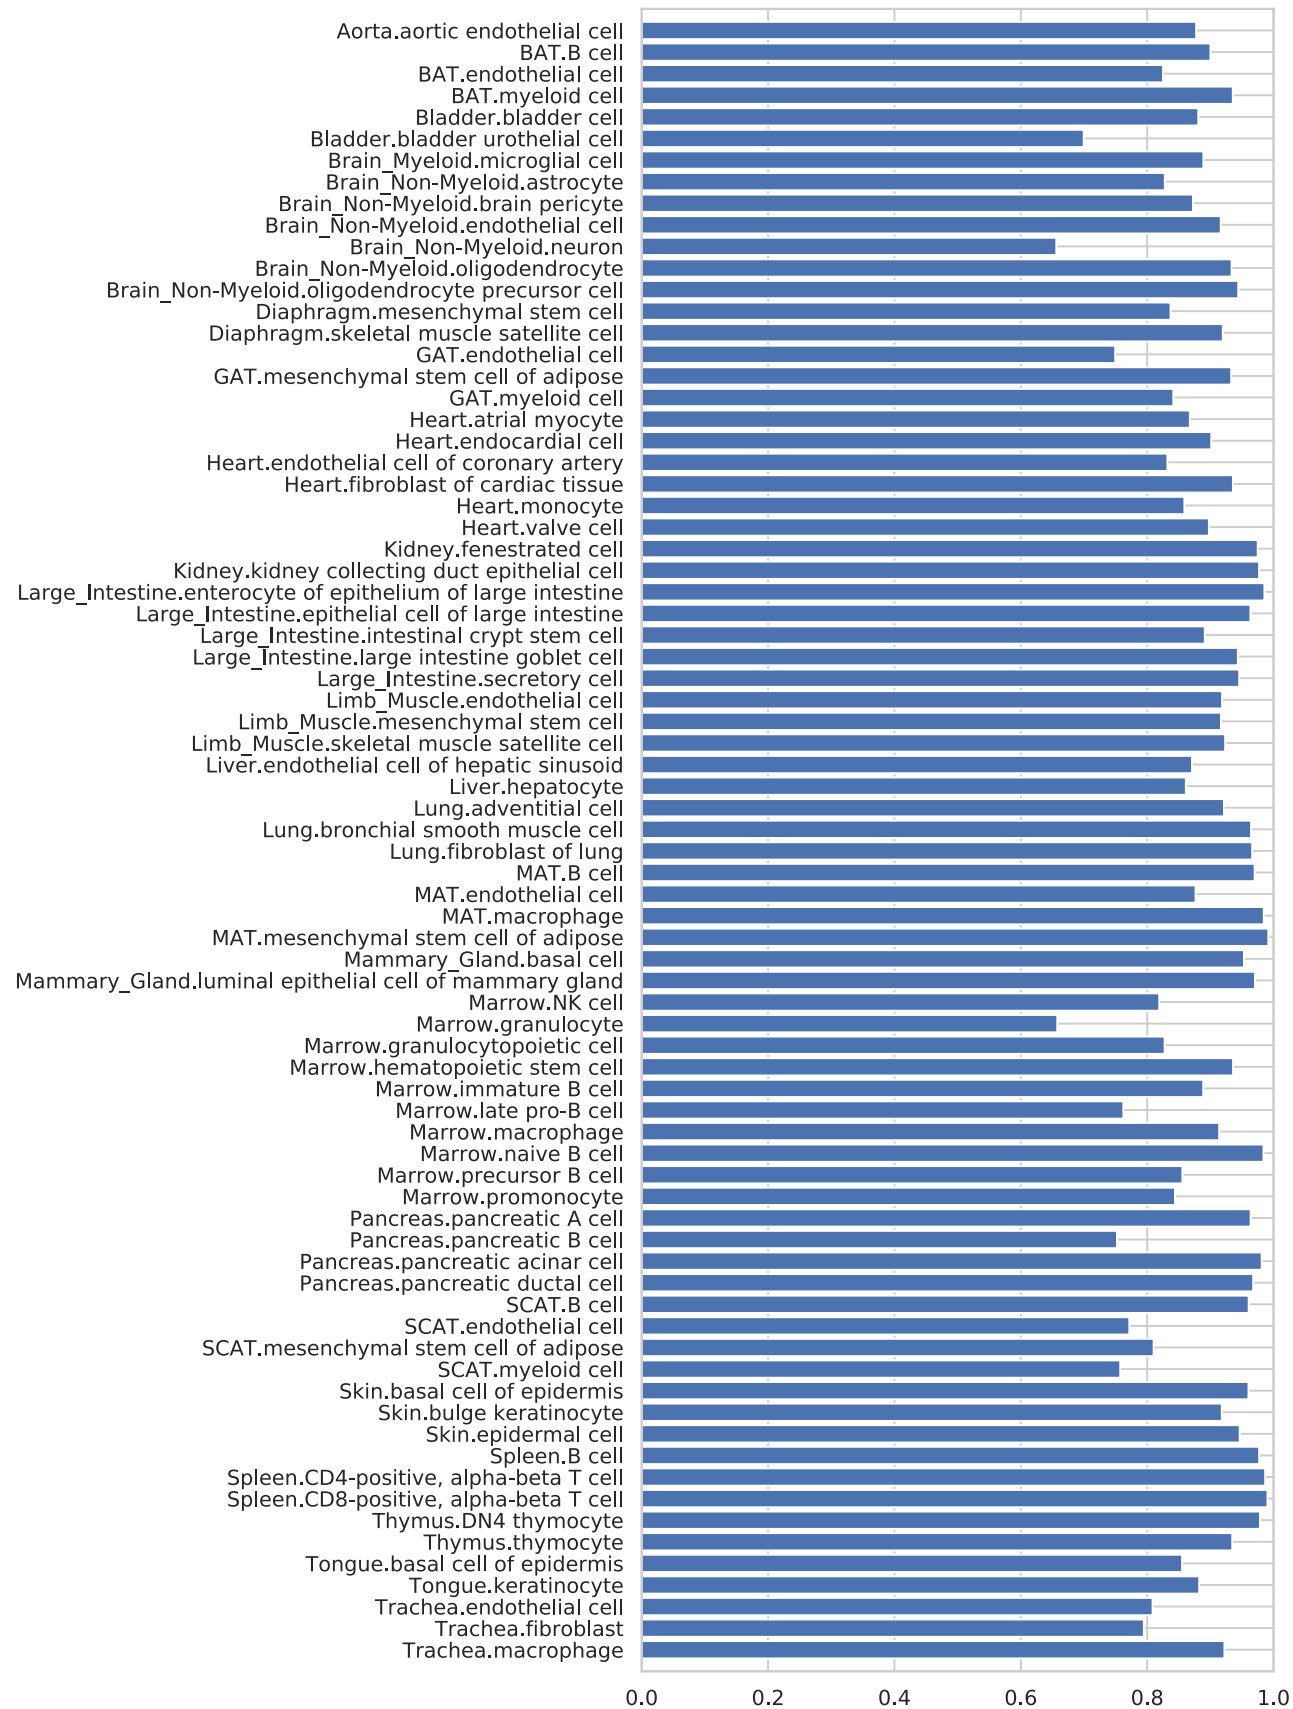**B**droplet: correlation of estimated age coefficient  
w/ and w/o CDR correction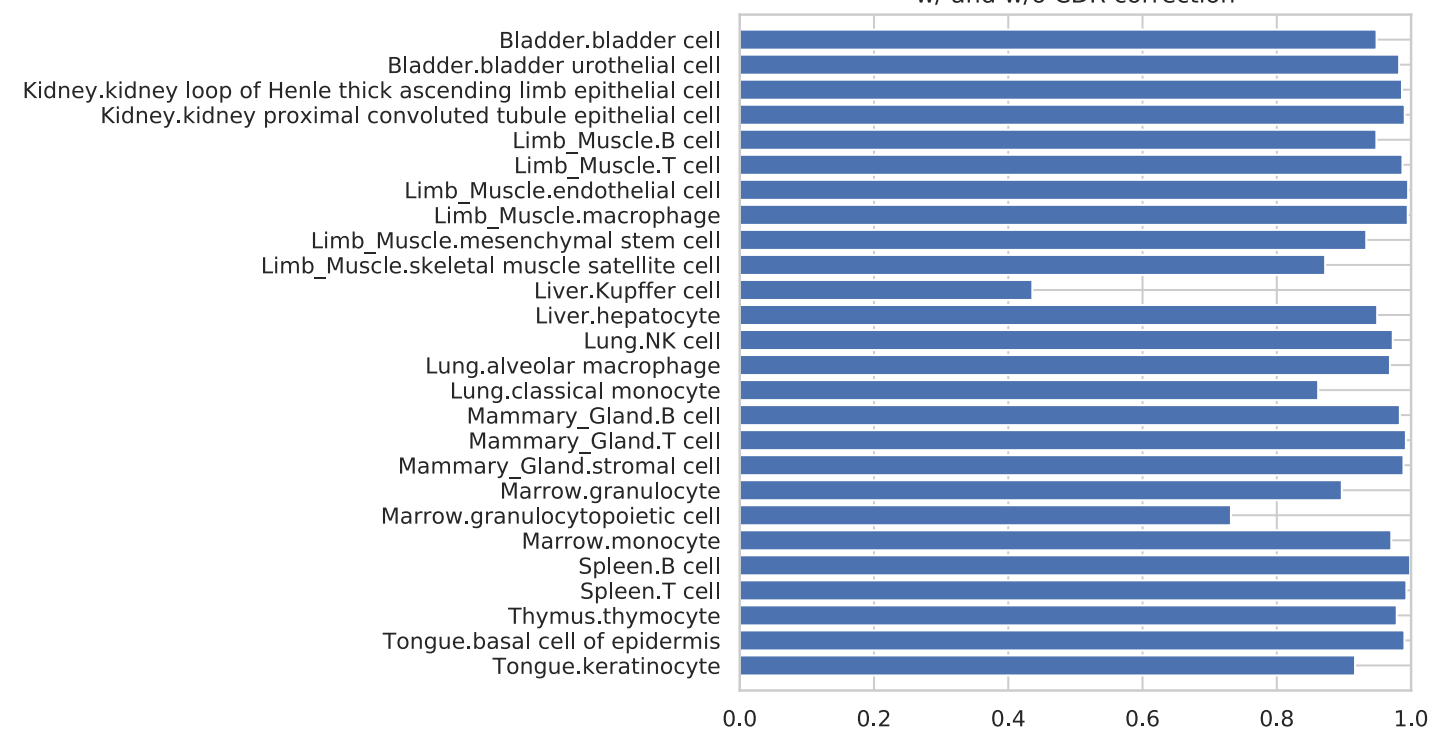

Supplement: supp [file elife-62293-supp-v1.zip]
