# Supplementary material for: Mouse aging cell atlas analysis reveals global and cell type-specific aging signatures
Source: eLife journal article supplement (doi:10.7554/elife.62293), 2021-04-12
Supplement: supp [file elife-62293-supp-v1.zip]

**A**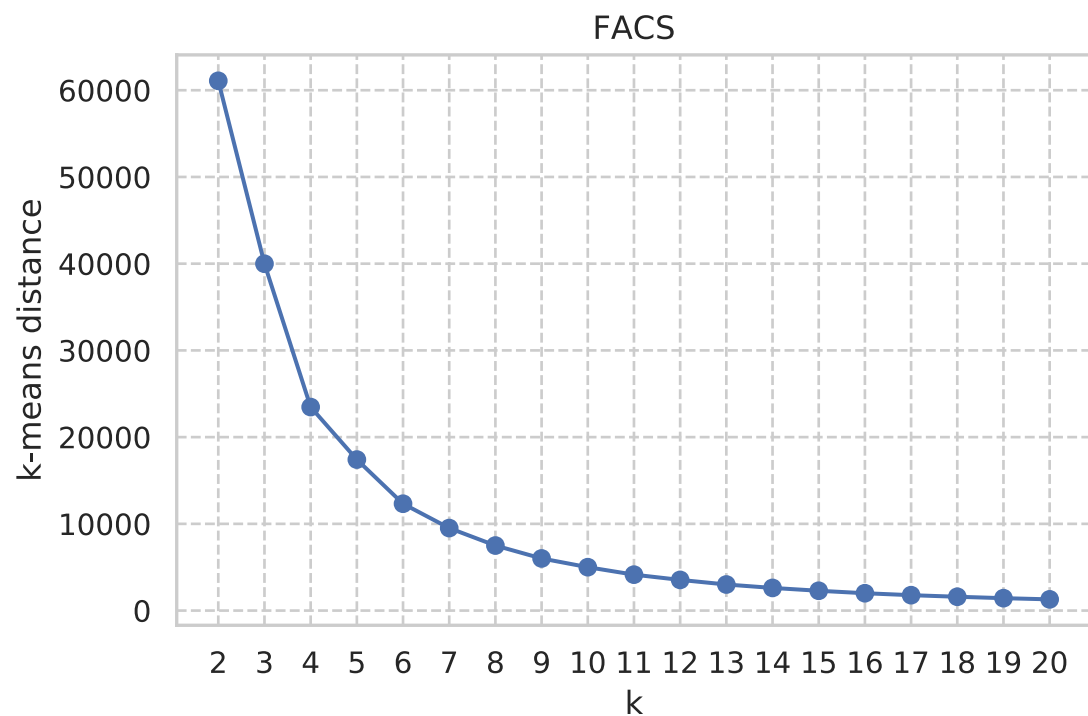**B**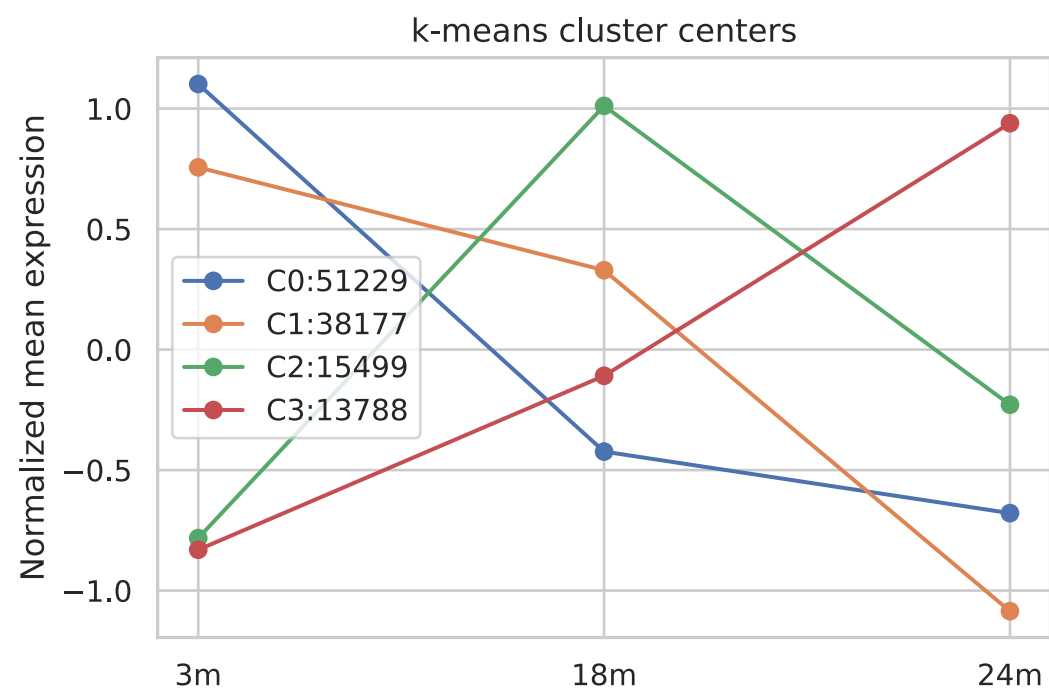**C**

|                                                             |      | Number of genes in each cluster |     |      |    |
|-------------------------------------------------------------|------|---------------------------------|-----|------|----|
|                                                             |      | C0                              | C1  | C2   | C3 |
| Aorta.aortic endothelial cell                               | 803  | 211                             | 68  | 218  |    |
| BAT.B cell                                                  | 82   | 109                             | 182 | 51   |    |
| BAT.endothelial cell                                        | 203  | 111                             | 56  | 117  |    |
| BAT.myeloid cell                                            | 165  | 882                             | 80  | 143  |    |
| Bladder.bladder cell                                        | 1206 | 228                             | 351 | 214  |    |
| Bladder.bladder urothelial cell                             | 421  | 734                             | 187 | 360  |    |
| Brain_Myeloid.microglial cell                               | 519  | 402                             | 248 | 68   |    |
| Brain_Non-Myeloid.astrocyte                                 | 518  | 396                             | 133 | 244  |    |
| Brain_Non-Myeloid.brain pericyte                            | 1752 | 844                             | 385 | 116  |    |
| Brain_Non-Myeloid.endothelial cell                          | 1172 | 536                             | 191 | 171  |    |
| Brain_Non-Myeloid.neuron                                    | 2651 | 2194                            | 255 | 315  |    |
| Brain_Non-Myeloid.oligodendrocyte                           | 845  | 979                             | 621 | 428  |    |
| Brain_Non-Myeloid.oligodendrocyte precursor cell            | 256  | 111                             | 156 | 250  |    |
| Diaphragm.mesenchymal stem cell                             | 1334 | 1148                            | 142 | 248  |    |
| Diaphragm.skeletal muscle satellite cell                    | 1533 | 401                             | 137 | 106  |    |
| GAT.endothelial cell                                        | 1304 | 411                             | 458 | 376  |    |
| GAT.mesenchymal stem cell of adipose                        | 577  | 351                             | 533 | 161  |    |
| GAT.myeloid cell                                            | 322  | 337                             | 187 | 108  |    |
| Heart.atrial myocyte                                        | 1346 | 512                             | 65  | 40   |    |
| Heart.endocardial cell                                      | 178  | 228                             | 36  | 29   |    |
| Heart.endothelial cell of coronary artery                   | 326  | 1165                            | 76  | 62   |    |
| Heart.fibroblast of cardiac tissue                          | 284  | 651                             | 135 | 102  |    |
| Heart.monocyte                                              | 917  | 602                             | 57  | 83   |    |
| Heart.valve cell                                            | 120  | 199                             | 63  | 48   |    |
| Kidney.fenestrated cell                                     | 66   | 32                              | 35  | 22   |    |
| Kidney.kidney collecting duct epithelial cell               | 46   | 20                              | 14  | 17   |    |
| Large_Intestine.enterocyte of epithelium of large intestine | 556  | 209                             | 384 | 1035 |    |
| Large_Intestine.epithelial cell of large intestine          | 27   | 73                              | 473 | 271  |    |
| Large_Intestine.intestinal crypt stem cell                  | 1050 | 306                             | 500 | 128  |    |
| Large_Intestine.large intestine goblet cell                 | 277  | 99                              | 399 | 289  |    |
| Large_Intestine.secretory cell                              | 164  | 424                             | 415 | 301  |    |
| Limb_Muscle.endothelial cell                                | 855  | 193                             | 119 | 72   |    |
| Limb_Muscle.mesenchymal stem cell                           | 1680 | 591                             | 594 | 180  |    |
| Limb_Muscle.skeletal muscle satellite cell                  | 2056 | 537                             | 415 | 94   |    |
| Liver.endothelial cell of hepatic sinusoid                  | 234  | 59                              | 115 | 127  |    |
| Liver.hepatocyte                                            | 991  | 376                             | 106 | 352  |    |
| Lung.adventitial cell                                       | 549  | 264                             | 258 | 341  |    |
| Lung.bronchial smooth muscle cell                           | 140  | 315                             | 103 | 103  |    |
| Lung.fibroblast of lung                                     | 60   | 54                              | 34  | 52   |    |
| MAT.B cell                                                  | 18   | 12                              | 40  | 28   |    |
| MAT.endothelial cell                                        | 44   | 9                               | 27  | 39   |    |
| MAT.macrophage                                              | 13   | 2                               | 39  | 37   |    |
| MAT.mesenchymal stem cell of adipose                        | 308  | 182                             | 545 | 123  |    |
| Mammary_Gland.basal cell                                    | 528  | 2576                            | 183 | 0    |    |
| Mammary_Gland.luminal epithelial cell of mammary gland      | 207  | 1440                            | 161 | 0    |    |
| Marrow.NK cell                                              | 1284 | 1165                            | 411 | 269  |    |
| Marrow.granulocyte                                          | 694  | 274                             | 63  | 48   |    |
| Marrow.granulocytopoietic cell                              | 1417 | 334                             | 78  | 138  |    |
| Marrow.hematopoietic stem cell                              | 238  | 1751                            | 126 | 572  |    |
| Marrow.immature B cell                                      | 155  | 251                             | 132 | 86   |    |
| Marrow.late pro-B cell                                      | 524  | 1303                            | 482 | 374  |    |
| Marrow.macrophage                                           | 287  | 90                              | 89  | 38   |    |
| Marrow.naive B cell                                         | 882  | 466                             | 90  | 297  |    |
| Marrow.precursor B cell                                     | 315  | 1010                            | 279 | 117  |    |
| Marrow.promonocyte                                          | 1006 | 1275                            | 166 | 119  |    |
| Pancreas.pancreatic A cell                                  | 246  | 436                             | 269 | 61   |    |
| Pancreas.pancreatic B cell                                  | 581  | 364                             | 242 | 330  |    |
| Pancreas.pancreatic acinar cell                             | 7    | 28                              | 5   | 8    |    |
| Pancreas.pancreatic ductal cell                             | 114  | 378                             | 134 | 144  |    |
| SCAT.B cell                                                 | 64   | 93                              | 27  | 93   |    |
| SCAT.endothelial cell                                       | 757  | 535                             | 92  | 50   |    |
| SCAT.mesenchymal stem cell of adipose                       | 503  | 1220                            | 140 | 101  |    |
| SCAT.myeloid cell                                           | 666  | 1032                            | 59  | 136  |    |
| Skin.basal cell of epidermis                                | 1476 | 390                             | 775 | 167  |    |
| Skin.bulge keratinocyte                                     | 1704 | 388                             | 661 | 164  |    |
| Skin.epidermal cell                                         | 365  | 788                             | 259 | 171  |    |
| Spleen.B cell                                               | 374  | 178                             | 258 | 519  |    |
| Spleen.CD4-positive, alpha-beta T cell                      | 72   | 94                              | 98  | 84   |    |
| Spleen.CD8-positive, alpha-beta T cell                      | 64   | 79                              | 69  | 110  |    |
| Thymus.DN4 thymocyte                                        | 350  | 417                             | 156 | 282  |    |
| Thymus.thymocyte                                            | 1138 | 147                             | 50  | 714  |    |
| Tongue.basal cell of epidermis                              | 2238 | 346                             | 101 | 256  |    |
| Tongue.keratinocyte                                         | 1846 | 449                             | 93  | 195  |    |
| Trachea.endothelial cell                                    | 966  | 518                             | 103 | 138  |    |
| Trachea.fibroblast                                          | 1503 | 631                             | 203 | 250  |    |
| Trachea.macrophage                                          | 690  | 232                             | 28  | 88   |    |
|                                                             |      | C0                              | C1  | C2   | C3 |
|                                                             |      | k-means clusters                |     |      |    |
