# Supplementary material for: Mouse aging cell atlas analysis reveals global and cell type-specific aging signatures
Source: eLife journal article supplement (doi:10.7554/elife.62293), 2021-04-12
Supplement: supp [file elife-62293-supp-v1.zip]

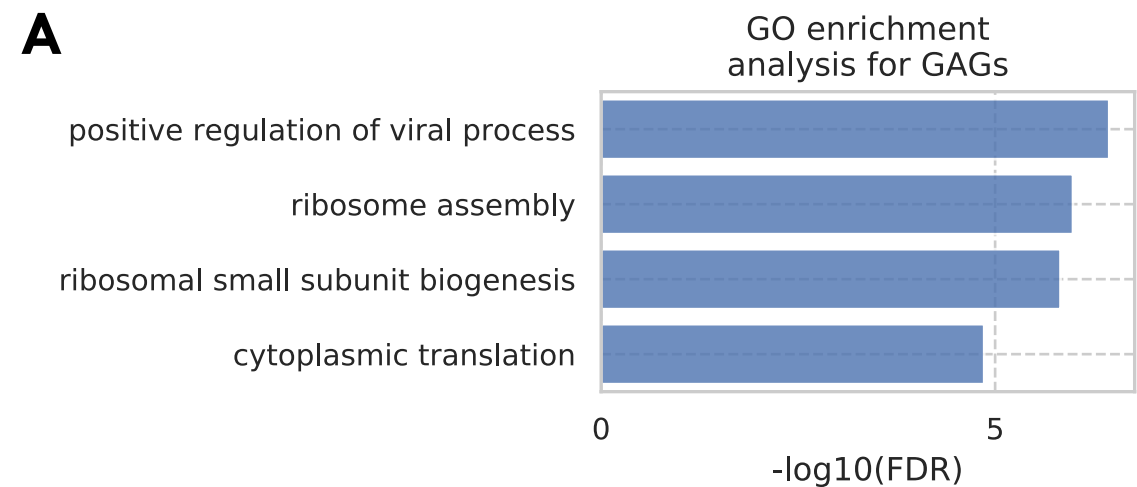

## Pathways for droplet GAGs

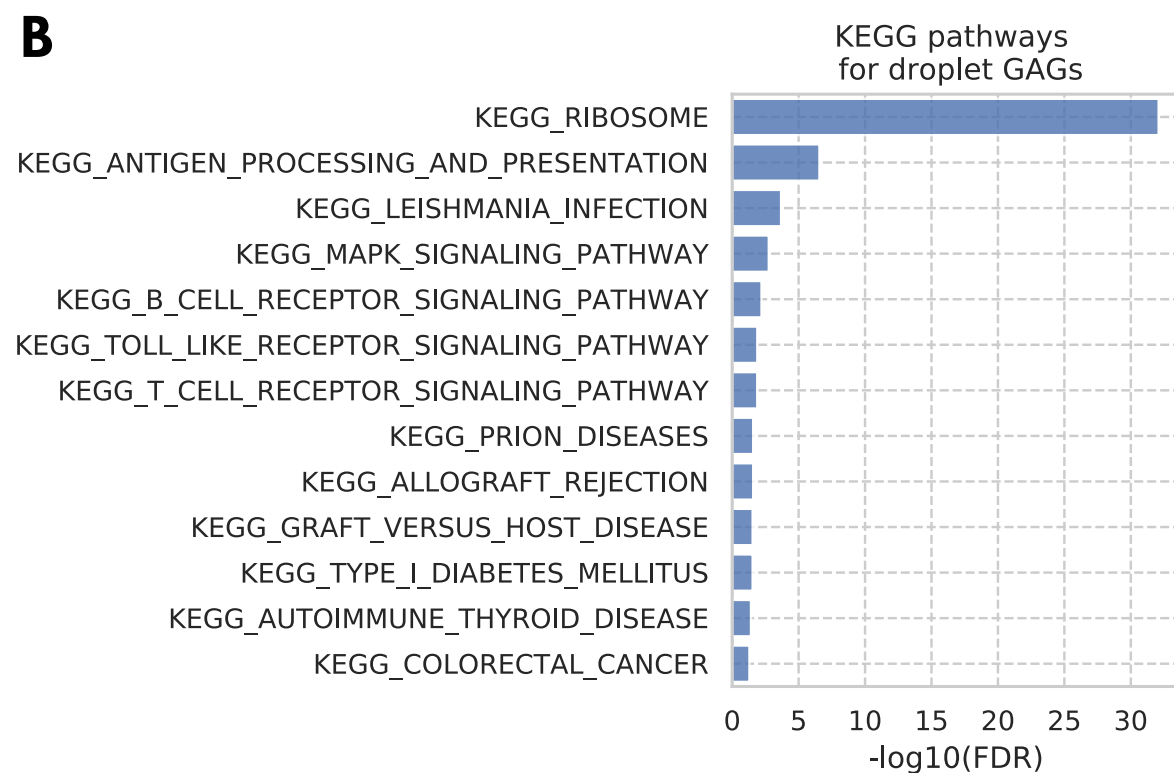

## KEGG pathways for droplet GAGs

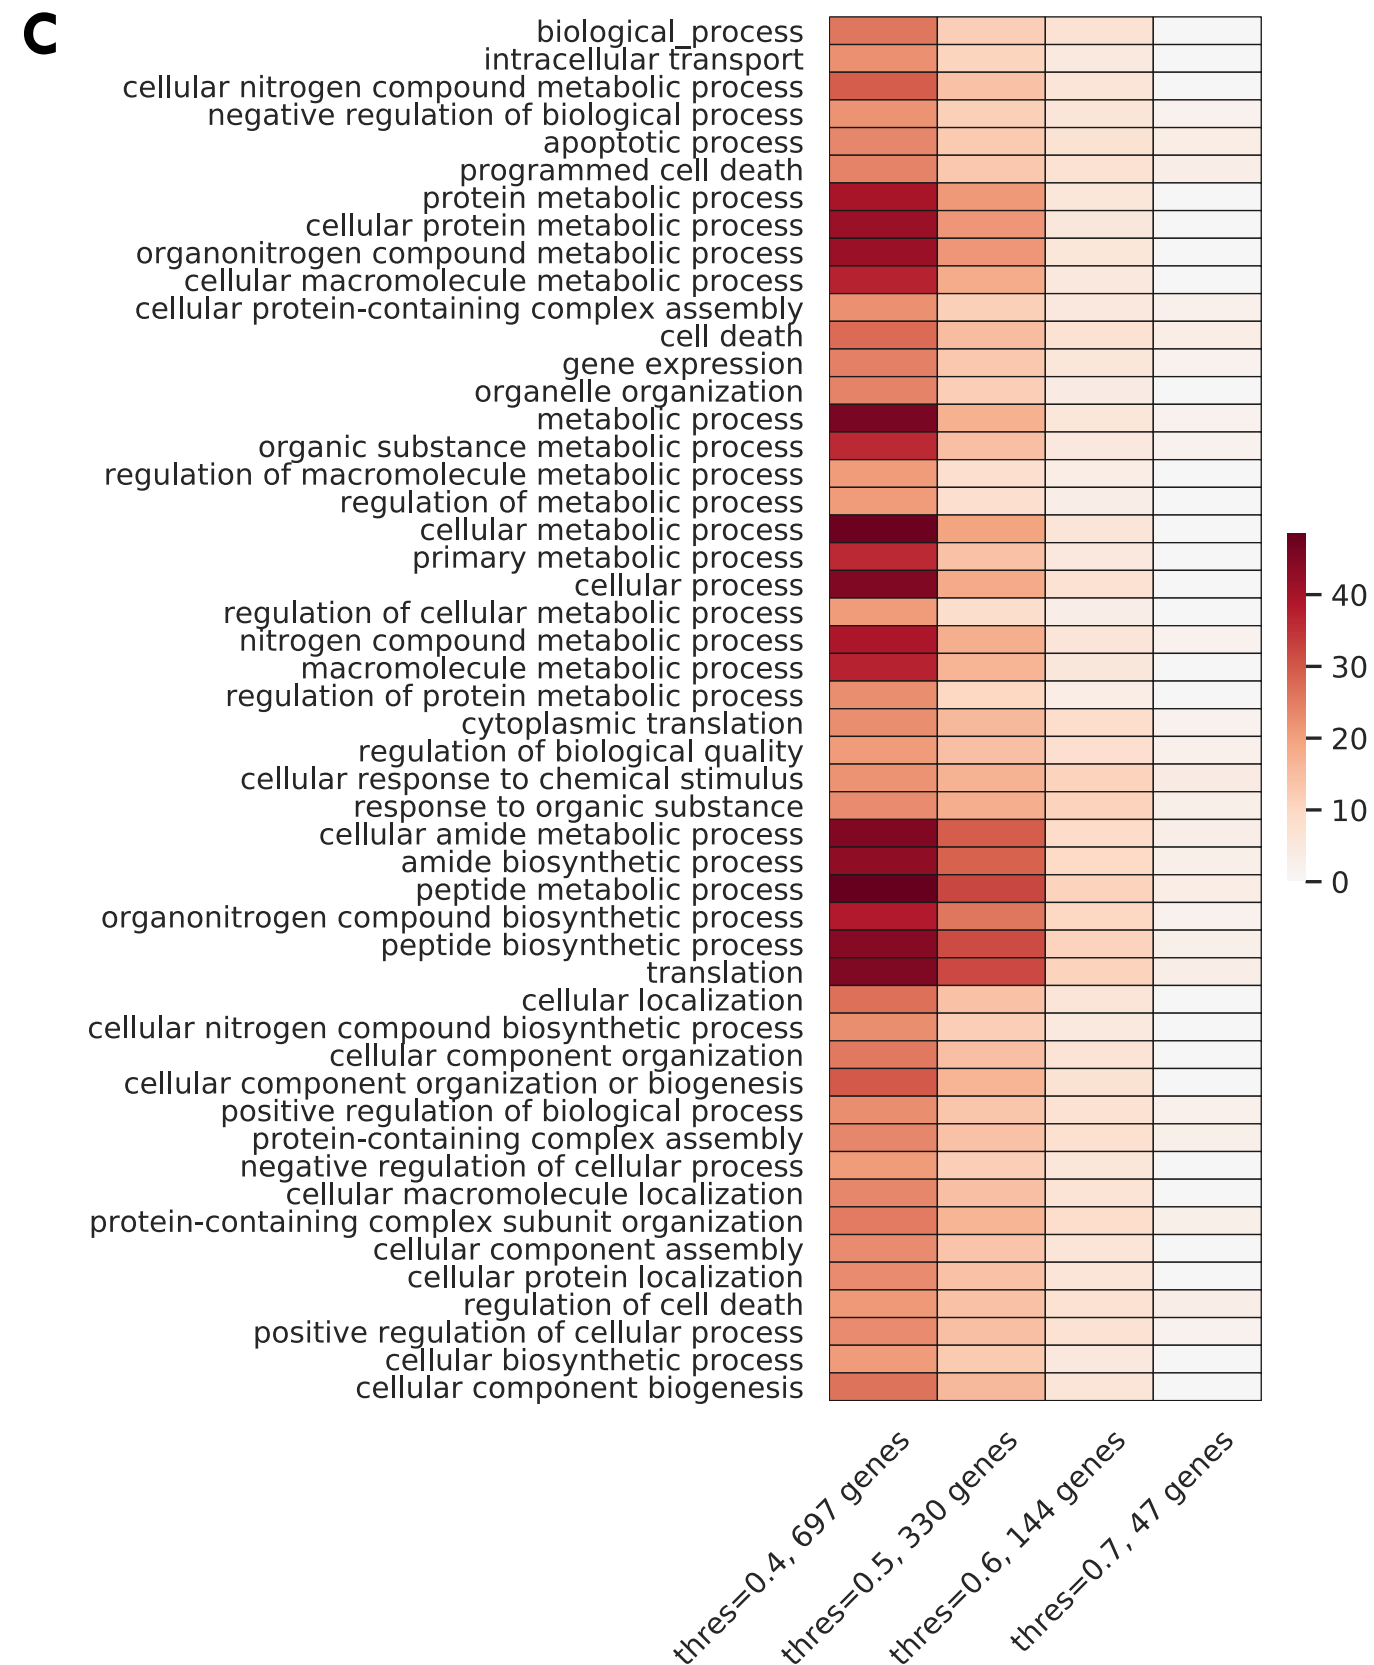

## Pathways for FACS GAGs with different significance thresholds
