# Supplementary material for: Mouse aging cell atlas analysis reveals global and cell type-specific aging signatures
Source: eLife journal article supplement (doi:10.7554/elife.62293), 2021-04-12
Supplement: supp [file elife-62293-supp-v1.zip]

Archive with 29 entries (29 files):
- elife_poa_e62293_Transparent_Reporting_File.pdf
- elife_poa_e62293_Figure_1_figure_supplement_1.pdf
- elife_poa_e62293_Figure_1_figure_supplement_2.pdf
- elife_poa_e62293_Figure_1_figure_supplement_3.pdf
- elife_poa_e62293_Figure_1_figure_supplement_4.pdf
- elife_poa_e62293_Figure_1_figure_supplement_5.pdf
- elife_poa_e62293_Figure_1_figure_supplement_6.pdf
- elife_poa_e62293_Figure_2_figure_supplement_1.pdf
- elife_poa_e62293_Figure_2_figure_supplement_2.pdf
- elife_poa_e62293_Figure_2_figure_supplement_3.pdf
- elife_poa_e62293_Figure_2_figure_supplement_4.pdf
- elife_poa_e62293_Figure_3_figure_supplement_1.pdf
- elife_poa_e62293_Figure_3_figure_supplement_2.pdf
- elife_poa_e62293_Figure_3_figure_supplement_3.pdf
- elife_poa_e62293_Figure_3_figure_supplement_4.pdf
- elife_poa_e62293_Figure_3_figure_supplement_5.pdf
- elife_poa_e62293_Figure_3_figure_supplement_6.pdf
- elife_poa_e62293_Figure_3_figure_supplement_7.pdf
- elife_poa_e62293_Figure_3_figure_supplement_8.pdf
- elife_poa_e62293_Figure_4_figure_supplement_1.pdf
- elife_poa_e62293_Figure_4_figure_supplement_2.pdf
- elife_poa_e62293_Figure_4_figure_supplement_3.pdf
- elife_poa_e62293_Figure_1_source_data_1.xlsx
- elife_poa_e62293_Figure_2_source_data_1.xlsx
- elife_poa_e62293_Figure_3_source_data_1.xlsx
- elife_poa_e62293_Figure_4_source_data_1.xlsx
- elife_poa_e62293_Supplementary_file_1.xlsx
- elife_poa_e62293_Supplementary_file_2.xlsx
- elife_poa_e62293_Supplementary_file_3.xlsx
