# Supplementary material for: Mouse aging cell atlas analysis reveals global and cell type-specific aging signatures
Source: eLife journal article supplement (doi:10.7554/elife.62293), 2021-04-12

**A**

w, t\_sig=0.5, t\_dir=0.8

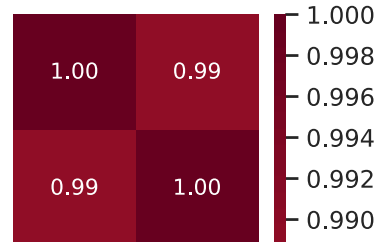w, t\_sig=0.5, t\_dir=0.8  
w/o background correction**B**

uw, t\_sig=0.5, t\_dir=0.8

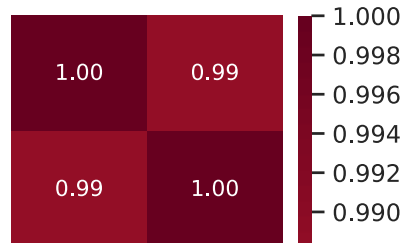

w, t\_sig=0.5, t\_dir=0.8

**C**

w, t\_sig=0.5, t\_dir=0.6

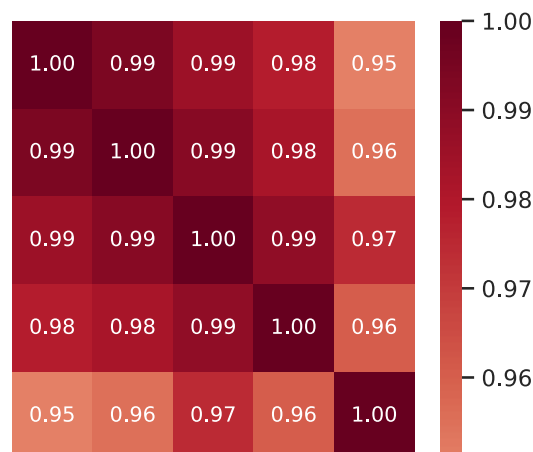

w, t\_sig=0.5, t\_dir=0.7

w, t\_sig=0.5, t\_dir=0.8

w, t\_sig=0.5, t\_dir=0.8  
w/o background correction

w, t\_sig=0.5, t\_dir=0.9

**D**

w, t\_sig=0.4, t\_dir=0.8

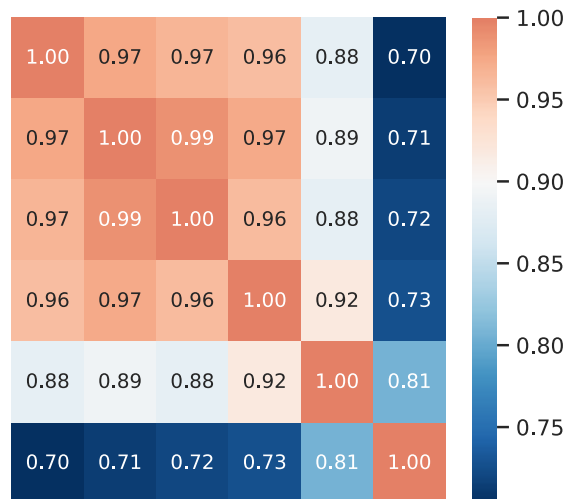

w, t\_sig=0.5, t\_dir=0.8

w, t\_sig=0.5, t\_dir=0.8  
w/o background correction

w, t\_sig=0.6, t\_dir=0.8

w, t\_sig=0.7, t\_dir=0.8

w, t\_sig=0.8, t\_dir=0.8

**E**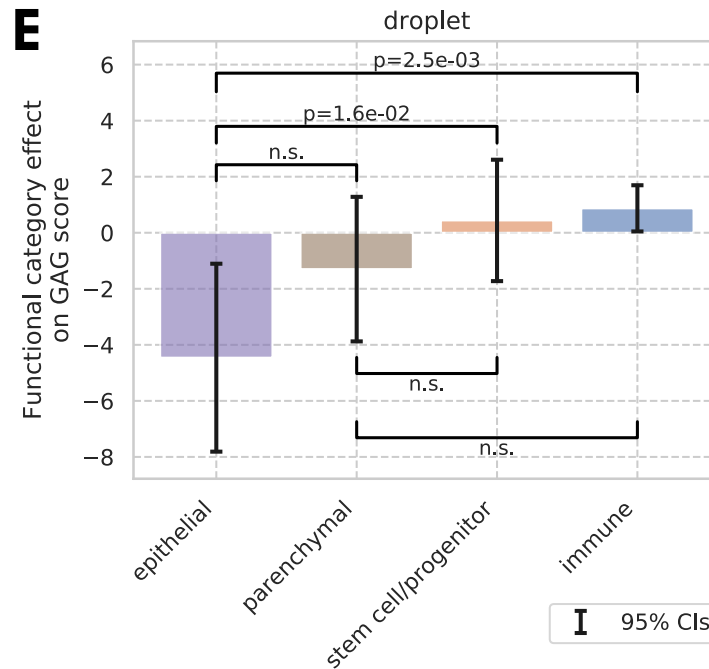**G**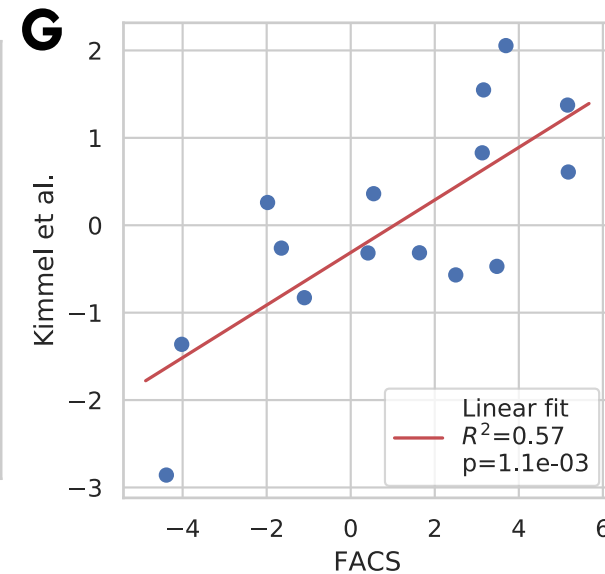**H**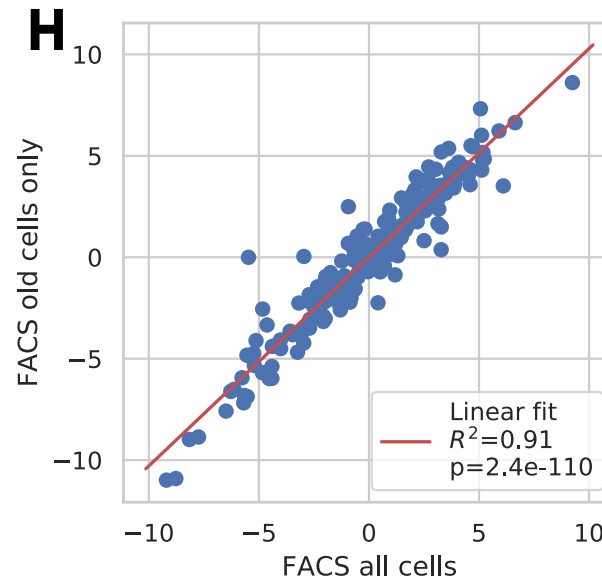**F**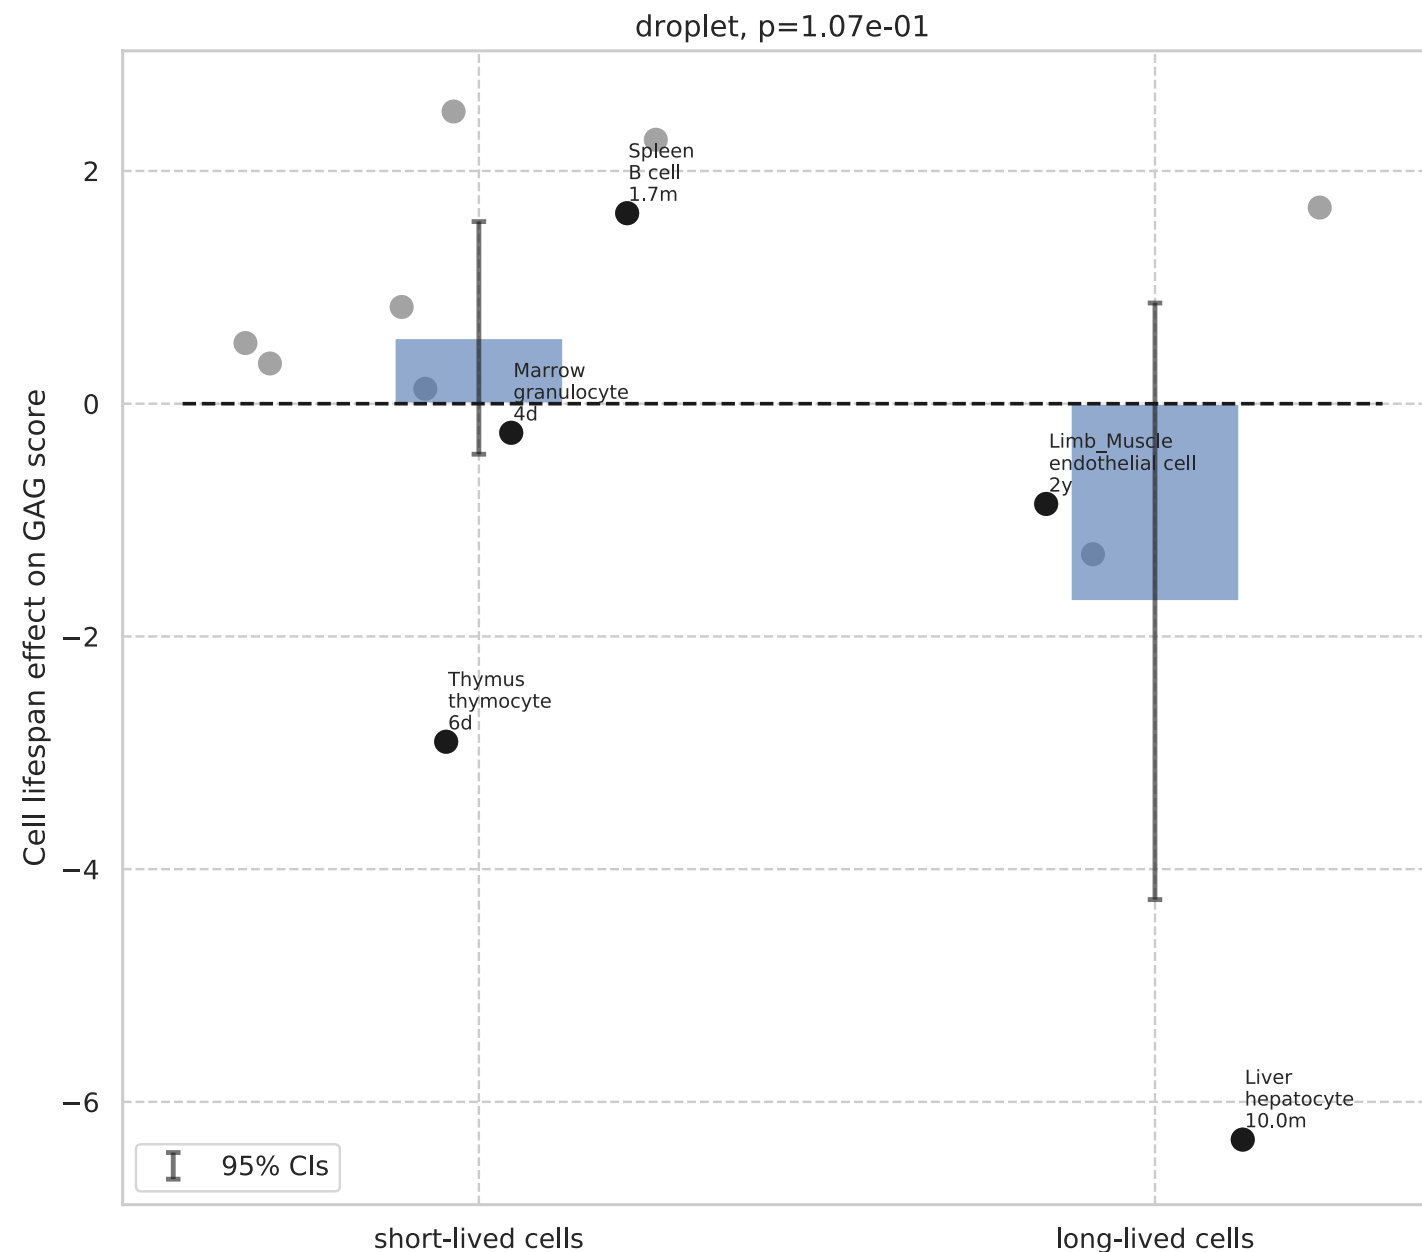

Supplement: supp [file elife-62293-supp-v1.zip]
