# Supplementary material for: Mouse aging cell atlas analysis reveals global and cell type-specific aging signatures
Source: eLife journal article supplement (doi:10.7554/elife.62293), 2021-04-12
Supplement: supp [file elife-62293-supp-v1.zip]

KEGG pathways  
for FACS GAGs

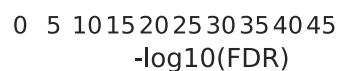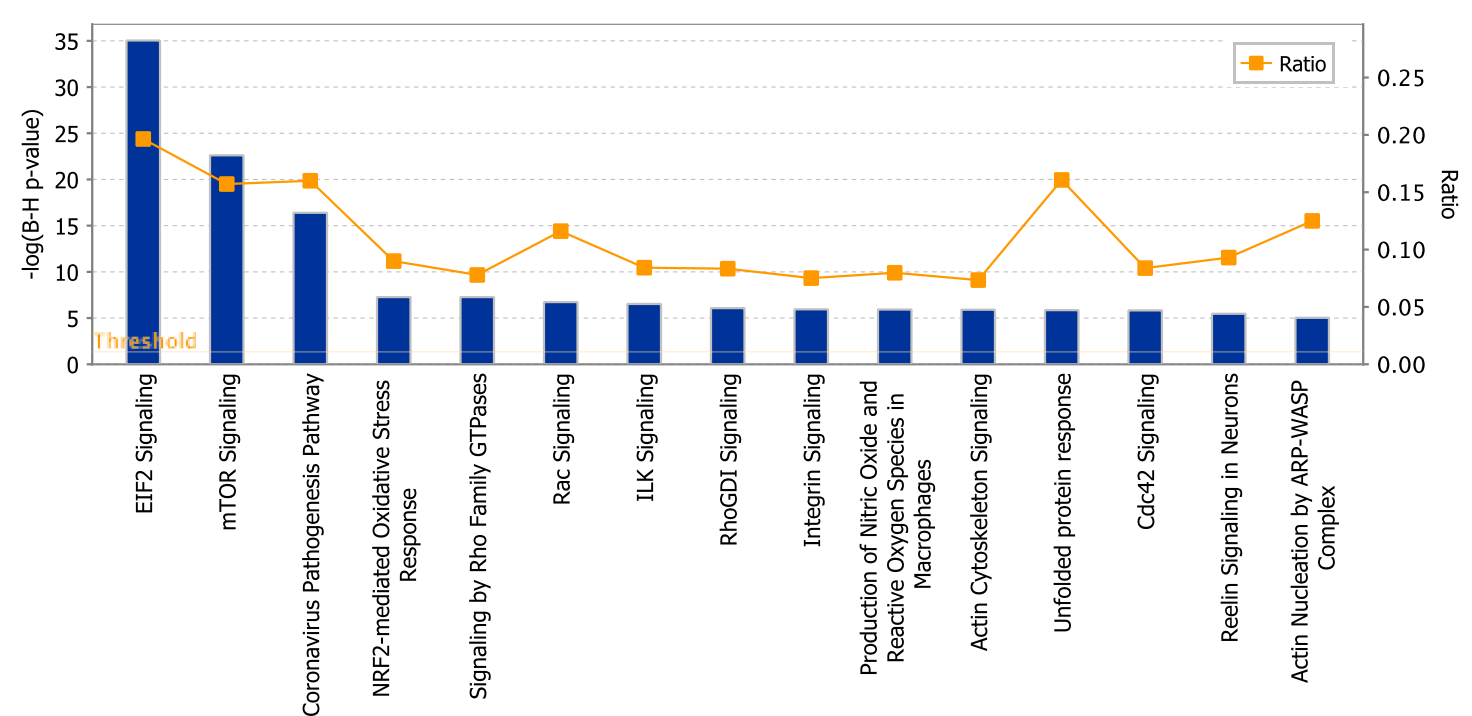

**Prediction Legend**

more extreme in dataset      less

Increased measurement      Decreased measurement

more confidence      less

Predicted activation      Predicted inhibition

Glow Indicates activity when opposite of measurement

**Predicted Relationships**

Leads to activation

Leads to inhibition

Findings inconsistent with state of downstream molecule

Effect not predicted
