# Supplementary material for: Mouse aging cell atlas analysis reveals global and cell type-specific aging signatures
Source: eLife journal article supplement (doi:10.7554/elife.62293), 2021-04-12
Supplement: supp [file elife-62293-supp-v1.zip › elife_poa_e62293_Figure_1_source_data_1.xlsx]

## Sheet: Figure 1B
	-log10(n_rej.down+1)	log10(n_rej.up+1)	up/down	n_cell
Aorta.aortic endothelial cell	-2.99913	2.48287	0.304609	2.66932
BAT.B cell	-2.11727	2.46982	2.25191	2.72346
BAT.endothelial cell	-2.44404	2.32428	0.758993	2.61595
BAT.myeloid cell	-3.01953	2.35411	0.216061	2.88081
Bladder.bladder cell	-3.15412	2.75967	0.403226	3.00518
Bladder.bladder urothelial cell	-3.06183	2.74115	0.477884	3.15229
Brain_Myeloid.microglial cell	-2.95665	2.52375	0.369061	4.11826
Brain_Non-Myeloid.astrocyte	-2.92012	2.6637	0.554087	2.77232
Brain_Non-Myeloid.brain pericyte	-3.37125	2.8739	0.318162	2.68485
Brain_Non-Myeloid.endothelial cell	-3.23045	2.57054	0.218824	3.34869
Brain_Non-Myeloid.neuron	-3.64953	2.98	0.21403	2.68485
Brain_Non-Myeloid.oligodendrocyte	-3.24724	3.04454	0.627051	3.32098
Brain_Non-Myeloid.oligodendrocyte precursor cell	-2.52892	2.64048	1.2929	2.49415
Diaphragm.mesenchymal stem cell	-3.39933	2.56348	0.145933	2.69373
Diaphragm.skeletal muscle satellite cell	-3.28578	2.39445	0.128431	2.95036
GAT.endothelial cell	-3.17493	3.02325	0.705214	2.53275
GAT.mesenchymal stem cell of adipose	-2.96567	2.8451	0.757576	3.19368
GAT.myeloid cell	-2.80821	2.49554	0.486781	2.85612
Heart.atrial myocyte	-3.26198	2.13672	0.0749453	2.60531
Heart.endocardial cell	-2.62221	1.73239	0.128878	2.57403
Heart.endothelial cell of coronary artery	-3.17522	2.1271	0.0895124	3.4304
Heart.fibroblast of cardiac tissue	-2.9722	2.37291	0.251599	3.56949
Heart.monocyte	-3.18184	2.14922	0.0927632	3.10755
Heart.valve cell	-2.49554	2.07555	0.380192	2.49831
Kidney.fenestrated cell	-1.97313	1.79934	0.670213	2.42813
Kidney.kidney collecting duct epithelial cell	-1.79934	1.5563	0.571429	2.64836
Large_Intestine.enterocyte of epithelium of large intestine	-2.88309	3.1529	1.86126	3.40518
Large_Intestine.epithelial cell of large intestine	-1.96379	2.87737	8.19565	3.23147
Large_Intestine.intestinal crypt stem cell	-3.1271	2.81023	0.48209	3.19838
Large_Intestine.large intestine goblet cell	-2.48714	2.88024	2.47231	3.20058
Large_Intestine.secretory cell	-2.7679	2.85733	1.22867	2.75051
Limb_Muscle.endothelial cell	-3.01157	2.33041	0.208374	2.6561
Limb_Muscle.mesenchymal stem cell	-3.32325	2.97405	0.447506	2.97081
Limb_Muscle.skeletal muscle satellite cell	-3.38917	2.81558	0.266939	3.26316
Liver.endothelial cell of hepatic sinusoid	-2.38739	2.46687	1.20082	2.79029
Liver.hepatocyte	-3.12872	2.68305	0.358364	3.06521
Lung.adventitial cell	-2.88818	2.80686	0.829237	2.4609
Lung.bronchial smooth muscle cell	-2.63749	2.35984	0.52765	3.32572
Lung.fibroblast of lung	-2.05308	1.94939	0.787611	2.68395
MAT.B cell	-1.39794	1.87506	3	2.5682
MAT.endothelial cell	-1.65321	1.88081	1.68889	2.40312
MAT.macrophage	-1.14613	1.89763	5.64286	2.35793
MAT.mesenchymal stem cell of adipose	-2.69108	2.82543	1.36253	3.14489
Mammary_Gland.basal cell	-3.32736	3.06595	0.547765	3.20737
Mammary_Gland.luminal epithelial cell of mammary gland	-3.04493	2.84572	0.632101	2.77815
Marrow.NK cell	-3.34518	2.96237	0.414182	2.67486
Marrow.granulocyte	-2.98632	2.04922	0.115583	3.4612
Marrow.granulocytopoietic cell	-3.24279	2.34242	0.125786	2.68395
Marrow.hematopoietic stem cell	-3.29907	2.84386	0.350578	3.5193
Marrow.immature B cell	-2.56348	2.41497	0.710383	2.77012
Marrow.late pro-B cell	-3.19229	3.05231	0.72447	2.61384
Marrow.macrophage	-2.5611	2.15229	0.39011	2.64048
Marrow.naive B cell	-3.12743	2.5977	0.295302	3.47114
Marrow.precursor B cell	-3.07555	2.72673	0.447899	2.93247
Marrow.promonocyte	-3.35717	2.46538	0.128295	3.00647
Pancreas.pancreatic A cell	-2.82866	2.53148	0.504451	2.71684
Pancreas.pancreatic B cell	-2.94939	2.79865	0.706742	3.12775
Pancreas.pancreatic acinar cell	-1.54407	1.17609	0.428571	2.76042
Pancreas.pancreatic ductal cell	-2.68753	2.45484	0.585216	2.49554
SCAT.B cell	-2.18469	2.10037	0.823529	2.5092
SCAT.endothelial cell	-3.1014	2.23805	0.136975	2.68931
SCAT.mesenchymal stem cell of adipose	-3.2307	2.42325	0.155791	3.1959
SCAT.myeloid cell	-3.22763	2.31387	0.121966	2.93298
Skin.basal cell of epidermis	-3.26694	2.98272	0.51974	3.22324
Skin.bulge keratinocyte	-3.31218	2.93802	0.422515	3.41564
Skin.epidermal cell	-3.05843	2.64444	0.38549	2.69197
Spleen.B cell	-2.74036	2.89265	1.42	3.455
Spleen.CD4-positive, alpha-beta T cell	-2.20683	2.27646	1.17391	2.617
Spleen.CD8-positive, alpha-beta T cell	-2.14301	2.26717	1.33094	2.549
Thymus.DN4 thymocyte	-2.88024	2.65128	0.59025	3.24452
Thymus.thymocyte	-3.1209	2.86332	0.552612	3.21085
Tongue.basal cell of epidermis	-3.41246	2.55388	0.138491	3.40518
Tongue.keratinocyte	-3.36116	2.45939	0.125381	3.07664
Trachea.endothelial cell	-3.13893	2.54407	0.254176	2.38202
Trachea.fibroblast	-3.32428	2.68034	0.227014	3.09202
Trachea.macrophage	-2.96426	2.07555	0.129207	2.63347
