# Supplementary material for: Mouse aging cell atlas analysis reveals global and cell type-specific aging signatures
Source: eLife journal article supplement (doi:10.7554/elife.62293), 2021-04-12
Supplement: supp [file elife-62293-supp-v1.zip › elife_poa_e62293_Figure_2_source_data_1.xlsx]

## Sheet: Figure 2A
gene	x_axis_prop_sig_w	y_axis_prop_upreg_w
0610005C13Rik	0.0304348	0.583333
0610007C21Rik	0.255072	0.521589
0610007L01Rik	0.111594	0.103448
0610007N19Rik	0.0688406	0.193548
0610007P08Rik	0.0188406	0
0610007P14Rik	0.0376812	0.393939
0610007P22Rik	0.0115942	0.857143
0610009B22Rik	0.0304348	0.381443
0610009D07Rik	0.176812	0.272727
0610009O20Rik	0.0652174	0
0610010F05Rik	0.0333333	0
0610010K14Rik	0.183333	0.938725
0610010O12Rik	0.168841	0.973545
0610011F06Rik	0.142029	0.72973
0610011L14Rik	0.230435	0
0610012G03Rik	0.138406	0.635338
0610030E20Rik	0.00869565	0.208333
0610031J06Rik	0.215942	0.226121
0610037L13Rik	0.131159	0.833948
0610037P05Rik	0.0768116	0.152284
0610039K10Rik	0.00434783	0
0610040J01Rik	0.0434783	0.166667
0910001L09Rik	0.547101	1
100043387	0.00724638	0
1100001G20Rik	0.0449275	0.0882353
1110001A16Rik	0.0449275	1
1110001J03Rik	0.101449	0.56
1110002B05Rik	0.176812	0.600726
1110002N22Rik	0.0289855	0
1110003E01Rik	0.303623	0.813916
1110004E09Rik	0.0884058	1
1110004F10Rik	0.143478	0.798246
1110005A03Rik	0.0724638	0.127119
1110007C09Rik	0.118116	0.713781
1110008F13Rik	0.144928	0.702247
1110008J03Rik	0.0268116	0.519231
1110008L16Rik	0.0666667	0.0652174
1110008P14Rik	0.0623188	0.191176
1110012J17Rik	0.0362319	0
1110014N23Rik	0.154348	0.0385604
1110017F19Rik	0.0347826	0.809524
1110018G07Rik	0.0144928	0.0763359
1110018J18Rik	0.138406	0.187266
1110019D14Rik	0.00724638	0
1110020G09Rik	0.015942	0.0731707
1110021L09Rik	0.00724638	0
1110028C15Rik	0.073913	0.218978
1110031I02Rik	0.0188406	0.268293
1110032A03Rik	0.0289855	0
1110032A04Rik	0.0217391	0
1110034A24Rik	0.0115942	0
1110034B05Rik	0.0289855	0
1110034G24Rik	0.0362319	0
1110037F02Rik	0.0565217	0.0337079
1110038B12Rik	0.0623188	0
1110038D17Rik	0.0652174	0.113122
1110038F14Rik	0.0942029	1
1110049F12Rik	0.084058	0.132743
1110051M20Rik	0.00724638	0.4
1110054O05Rik	0.0434783	0.357143
1110057K04Rik	0.0623188	0.210084
1110058L19Rik	0.0413043	0.205607
1110059E24Rik	0.0289855	0.117647
1110059G10Rik	0.0188406	0.884615
1110065P20Rik	0.0217391	1
1110067D22Rik	0.115942	0.25
1190002F15Rik	0.00434783	1
1190002H23Rik	0.231159	0.448882
1190002N15Rik	0.181884	0
1190003J15Rik	0.13913	0.583333
1190005F20Rik	0.0463768	0
1190005I06Rik	0.00724638	1
1190007F08Rik	0.0181159	0.666667
1190007I07Rik	0.0115942	1
1200011I18Rik	0.0333333	0.0458015
1200011M11Rik	0.0623188	0.163934
1200014J11Rik	0.0413043	0.280374
1300001I01Rik	0.0630435	0.364964
1300002E11Rik	0.00434783	1
1300002K09Rik	0.0326087	0.666667
1300010F03Rik	0.0594203	0.0955414
1300014I06Rik	0.308696	0.297723
1300017J02Rik	0.0217391	1
1300018I17Rik	0.0188406	0
1300018J18Rik	0.0768116	0.15625
1500001M20Rik	0.00434783	0.0652174
1500002O20Rik	0.00434783	1
1500003O03Rik	0.472464	0
1500009C09Rik	0.00724638	0
1500010J02Rik	0.092029	0.232068
1500011B03Rik	0.026087	0.722222
1500011H22Rik	0.00724638	0.318182
1500011K16Rik	0.0289855	0.5
1500012F01Rik	0.130435	0
1500012K07Rik	0.00724638	1
1500015O10Rik	0.0434783	0.6
1500031L02Rik	0.00724638	0.483871
1500032L24Rik	0.301449	0.578387
1520402A15Rik	0.00724638	0
1600002H07Rik	0.0289855	0.25
1600010M07Rik	0.0188406	0
1600012F09Rik	0.0289855	0
1600012H06Rik	0.223188	0
1600014C10Rik	0.0927536	0
1600021P15Rik	0.0144928	0
1600029D21Rik	0.107971	0.849246
1700001D01Rik	0.0217391	0
1700003E16Rik	0.00724638	0
1700011H14Rik	0.0108696	1
1700012B15Rik	0.0115942	1
1700012D14Rik	0.00724638	0
1700017B05Rik	0.164493	0.134328
1700018L02Rik	0.00434783	1
1700019D03Rik	0.0253623	1
1700019E19Rik	0.130435	0.632653
1700019G17Rik	0.00724638	1
1700020I14Rik	0.104348	0
1700020O03Rik	0.0144928	0
1700021F05Rik	0.0521739	0.262295
1700021K19Rik	0.00724638	0.6
1700023F06Rik	0.00724638	1
1700025G04Rik	0.0652174	0.714286
1700026L06Rik	0.00434783	0
1700029F09Rik	0.0927536	0.307018
1700029G01Rik	0.0144928	0.5
1700029J07Rik	0.0181159	0
1700030K09Rik	0.0144928	0.25
1700034H14Rik	0.0115942	0
1700037H04Rik	0.0289855	0.526316
1700040I03Rik	0.00434783	0.565217
1700045I19Rik	0.0217391	1
1700049E15Rik	0.0108696	0
1700052N19Rik	0.0115942	0
1700054N08Rik	0.0108696	0.6
1700063D05Rik	0.00724638	1
1700066B19Rik	0.00869565	1
1700066M21Rik	0.0188406	0.230769
1700080N15Rik	0.00724638	0
1700081L11Rik	0.134058	0.0384615
1700086L19Rik	0.0181159	0.285714
1700106N22Rik	0.026087	0.117647
1700109H08Rik	0.0144928	0.5
1700112E06Rik	0.0217391	0
1700113A16Rik	0.0289855	0.875
1700113I22Rik	0.0144928	0.333333
1700123O20Rik	0.065942	0.188679
1810006K21Rik	0.427536	0.015444
1810007D17Rik	0.0108696	1
1810008A18Rik	0.0405797	0.361702
1810008I18Rik	0.0217391	0
1810009A15Rik	0.0608696	0.295302
1810010D01Rik	0.00869565	1
1810011O10Rik	0.32971	0.0530973
1810012P15Rik	0.0181159	0.6
1810013D10Rik	0.130435	0.601504
1810013L24Rik	0.363768	0.253425
1810014B01Rik	0.00724638	0
1810014F10Rik	0.0644928	0.311927
1810019D21Rik	0.0108696	0.5
1810019J16Rik	0.057971	0.136364
1810020D17Rik	0.0956522	0.418605
1810022K09Rik	0.161594	0.457364
1810026B05Rik	0.0826087	0.426829
1810026J23Rik	0.201449	0
1810027O10Rik	0.233333	0.19898
1810029B16Rik	0.0405797	0.302326
1810030J14Rik	0.0594203	0.510638
1810030N24Rik	0.00869565	1
1810030O07Rik	0.149275	0
1810031K17Rik	0.0985507	0.902256
1810033B17Rik	0.034058	0.313433
1810035L17Rik	0.186957	0.019802
1810037I17Rik	0.223188	0.2134
1810041L15Rik	0.0144928	0
1810043G02Rik	0.00724638	0.666667
1810043H04Rik	0.0782609	0.262295
1810046J19Rik	0.208696	0.692708
1810048J11Rik	0.00724638	0
1810049H13Rik	0.0144928	0
1810055G02Rik	0.232609	0
1810058I24Rik	0.162319	0.434783
1810063B05Rik	0.042029	0.264706
1810063B07Rik	0.0782609	0.481865
1810065E05Rik	0.0130435	1
1810074P20Rik	0.0507246	0.304054
2010001M09Rik	0.0253623	1
2010002M12Rik	0.00869565	0
2010002N04Rik	0.0724638	0.247525
2010003K11Rik	0.00869565	0
2010003K15Rik	0.0217391	0
2010003O02Rik	0.0253623	0
2010015L04Rik	0.0217391	0
2010016I18Rik	0.0413043	1
2010106G01Rik	0.433333	0.0189155
2010107E04Rik	0.525362	0
2010107G23Rik	0.142029	1
2010107H07Rik	0.0144928	0
2010109I03Rik	0.00869565	0
2010109K11Rik	0.00869565	0.151515
2010110P09Rik	0.0231884	0.25641
2010111I01Rik	0.121014	0.603524
2010305A19Rik	0.0115942	0.0909091
2010315B03Rik	0.00724638	0
2010317E24Rik	0.00434783	0.375
2010320M18Rik	0.00724638	0.25
2010321M09Rik	0.198551	0
2200002D01Rik	0.0608696	0
2210010C04Rik	0.0217391	0.333333
2210010C17Rik	0.00724638	0.2
2210012G02Rik	0.026087	0
2210013O21Rik	0.0724638	0.44898
2210015D19Rik	0.00724638	0
2210016F16Rik	0.0869565	0.6
2210016L21Rik	0.102899	0.884793
2210018M11Rik	0.0376812	0
2210020M01Rik	0.0449275	0.690722
2210021J22Rik	0.0449275	0.782609
2210403K04Rik	0.218841	0.302594
2210404O07Rik	0.0391304	0.818182
2210408F21Rik	0.0144928	0.571429
2210408I21Rik	0.00724638	0
2210411K11Rik	0.0753623	0.881657
2210415F13Rik	0.0550725	0.559055
2210416O15Rik	0.00724638	1
2310001A20Rik	0.234783	0.0347826
2310001H17Rik	0.0405797	0
2310002J15Rik	0.0217391	0
2310002L13Rik	0.0217391	0
2310003C23Rik	0.0434783	0.3
2310003F16Rik	0.313043	0.542406
2310003H01Rik	0.12029	0
2310003L22Rik	0.0144928	0.166667
2310004N24Rik	0.0753623	0.615385
2310007B03Rik	0.0217391	0
2310008H04Rik	0.0507246	0
2310008H09Rik	0.0326087	0
2310010J17Rik	0.0108696	0
2310010M20Rik	0.00724638	0
2310011J03Rik	0.123188	0.862543
2310014L17Rik	0.00724638	0
2310015B20Rik	0.0108696	0
2310016M24Rik	0.294203	0.177365
2310021P13Rik	0.0362319	0.555556
2310022A10Rik	0.057971	0.166667
2310022B05Rik	0.0144928	0.555556
2310028H24Rik	0.00724638	0
2310030G06Rik	0.0217391	0.176471
2310030N02Rik	0.0347826	0.202247
2310033P09Rik	0.0768116	1
2310035C23Rik	0.0405797	0
2310035K24Rik	0.0217391	0.151515
2310036O22Rik	0.353623	0.984227
2310037I24Rik	0.237681	0.035503
2310039H08Rik	0.0623188	0.577465
2310042D19Rik	0.00724638	0
2310042E22Rik	0.0217391	0
2310044G17Rik	0.0963768	0
2310044H10Rik	0.726087	0.956063
2310045N01Rik	0.0217391	0.30303
2310046A06Rik	0.00724638	0
2310046O06Rik	0.0615942	0.738832
2310047B19Rik	0.0115942	0.12987
2310047M10Rik	0.00724638	1
2310057M21Rik	0.0507246	0
2310061C15Rik	0.0405797	0.821429
2310061I04Rik	0.00434783	0.105263
2310067B10Rik	0.0297101	0.0594059
2310079G19Rik	0.00869565	0
2400001E08Rik	0.45	0.957933
2400003C14Rik	0.384783	0.0187032
2410001C21Rik	0.118116	0.342183
2410002F23Rik	0.0521739	0.0659341
2410002O22Rik	0.175362	0.0536193
2410003K15Rik	0.0666667	0.365482
2410004B18Rik	0.0217391	0
2410004N09Rik	0.0217391	0
2410006H16Rik	0.144928	0.222973
2410015M20Rik	0.275362	0.717172
2410016O06Rik	0.0521739	0
2410017P09Rik	0.0115942	1
2410021H03Rik	0.0181159	0.4
2410022L05Rik	0.00724638	0.25
2410042D21Rik	0.142029	0
2410066E13Rik	0.00724638	0
2410075B13Rik	0.00724638	0
2410089E03Rik	0.0144928	0.5
2410091C18Rik	0.0333333	0
2410127L17Rik	0.0478261	0
2410131K14Rik	0.0217391	0.5
2500003M10Rik	0.23913	0.133838
2500004C02Rik	0.0115942	0
2510002D24Rik	0.119565	0.95122
2510003E04Rik	0.174638	0
2510006D16Rik	0.337681	0.878049
2510009E07Rik	0.126812	0
2510012J08Rik	0.0449275	0.254777
2510039O18Rik	0.386232	0.0217391
2510049J12Rik	0.0173913	1
2610001J05Rik	0.176812	0.819079
2610002J02Rik	0.0492754	0.94382
2610008E11Rik	0.0144928	0
2610018G03Rik	0.0173913	0
2610019F03Rik	0.0869565	0
2610027L16Rik	0.155072	0
2610029G23Rik	0.0442029	0.142857
2610034B18Rik	0.0507246	0
2610035D17Rik	0.0572464	0.0840336
2610039C10Rik	0.00869565	0.553571
2610044O15Rik	0.00724638	0
2610100L16Rik	0.00724638	0
2610101N10Rik	0.144203	0
2610203C20Rik	0.0652174	0
2610203C22Rik	0.00724638	0
2610301B20Rik	0.0217391	0
2610301G19Rik	0.142029	0.0311526
2610305D13Rik	0.0434783	0
2610306M01Rik	0.00434783	0.130435
2610307P16Rik	0.0144928	0
2610318N02Rik	0.00434783	0
2610507B11Rik	0.251449	0.0401606
2610507I01Rik	0.0347826	0
2610524H06Rik	0.00724638	0.333333
2610528A11Rik	0.026087	0.333333
2610528E23Rik	0.0144928	0
2610528J11Rik	0.139855	1
2700007P21Rik	0.123913	0
2700029M09Rik	0.16087	0.92674
2700049A03Rik	0.0434783	0
2700050L05Rik	0.0405797	0
2700060E02Rik	0.260145	0.56942
2700062C07Rik	0.0434783	0
2700078E11Rik	0.0478261	0
2700081O15Rik	0.0289855	0
2700086A05Rik	0.00869565	1
2700089E24Rik	0.261594	0.10395
2700090O03Rik	0.00724638	0
2700094K13Rik	0.0304348	0.638889
2700097O09Rik	0.0115942	0.217391
2700099C18Rik	0.00434783	1
2810001G20Rik	0.0333333	0.418605
2810002D19Rik	0.00724638	0
2810002N01Rik	0.0253623	0.647059
2810004N23Rik	0.0304348	0.193548
2810007J24Rik	0.0217391	0
2810008D09Rik	0.0434783	1
2810008M24Rik	0.363768	0
2810011L19Rik	0.00724638	1
2810013P06Rik	0.0637681	0.334728
2810021B07Rik	0.0144928	0.222222
2810021J22Rik	0.0217391	0.2
2810025M15Rik	0.0471014	0
2810046L04Rik	0.00434783	0.230769
2810055F11Rik	0.0289855	0
2810403A07Rik	0.168116	0.13089
2810405K02Rik	0.0485507	0.512195
2810407C02Rik	0.339855	0.146341
2810408M09Rik	0.0434783	0.283019
2810410L24Rik	0.0181159	1
2810417H13Rik	0.0565217	0.285714
2810422J05Rik	0.0775362	0.713115
2810422O20Rik	0.0434783	0
2810428I15Rik	0.17971	0.895561
2810429I04Rik	0.00724638	0
2810432D09Rik	0.0710145	0.525316
2810432L12Rik	0.0811594	0
2810453I06Rik	0.0768116	0.0621118
2810454H06Rik	0.0217391	0.285714
2810468N07Rik	0.0144928	0.5
2810474O19Rik	0.434058	0.0489663
2900005J15Rik	0.0108696	0.333333
2900010M23Rik	0.20942	0.570064
2900026A02Rik	0.0326087	0.423077
2900053A13Rik	0.0978261	0.0588235
2900055J20Rik	0.00724638	1
2900056M20Rik	0.0289855	0
2900064A13Rik	0.386232	0.655397
2900092E17Rik	0.0876812	0.85782
2900097C17Rik	0.528261	0.185792
3010026O09Rik	0.0108696	0
3100003L05Rik	0.00724638	0
3110001D03Rik	0.0666667	1
3110002H16Rik	0.132609	0
3110003A17Rik	0.0913043	0.639004
3110009E18Rik	0.00724638	1
3110021N24Rik	0.057971	0
3110035E14Rik	0.00724638	0
3110040N11Rik	0.0289855	0.882353
3110043O21Rik	0.057971	0
3110045C21Rik	0.00434783	1
3110047P20Rik	0.00724638	0
3110052M02Rik	0.0152174	0.782609
3110056O03Rik	0.0333333	0.13245
3110057O12Rik	0.00724638	0
3110079O15Rik	0.0217391	1
3110082I17Rik	0.0195652	0.574468
3200002M19Rik	0.00724638	0
3230401D17Rik	0.150725	0.12894
3632451O06Rik	0.0905797	0
3830406C13Rik	0.0768116	0.0884956
3830417A13Rik	0.0217391	0
4430402I18Rik	0.00724638	0
4632411B12Rik	0.104348	0.160494
4632415K11Rik	0.0144928	0
4632427E13Rik	0.0913043	0.0763359
4632428N05Rik	0.216667	0.448718
4632434I11Rik	0.00869565	0
4732418C07Rik	0.222464	0.383698
4831426I19Rik	0.00869565	0
4831440E17Rik	0.00724638	1
4833403I15Rik	0.0144928	0
4833420G17Rik	0.0862319	0
4833423E24Rik	0.0434783	0
4833439L19Rik	0.481159	0
4833442J19Rik	0.076087	0.166667
4921511C10Rik	0.0115942	0
4921513D23Rik	0.460145	0.379665
4921524J17Rik	0.026087	0.803922
4921531C22Rik	0.0746377	0.164234
4922501C03Rik	0.00434783	0
4922501L14Rik	0.0108696	0
4930402H24Rik	0.0398551	0.516129
4930404N11Rik	0.0217391	1
4930413F20Rik	0.00724638	1
4930413G21Rik	0.0333333	1
4930414L22Rik	0.156522	0.611511
4930420K17Rik	0.0144928	0.666667
4930427A07Rik	0.0130435	0
4930429F24Rik	0.00724638	0.6
4930430F08Rik	0.0144928	0
4930432K21Rik	0.00724638	1
4930441O14Rik	0.00724638	0.5
4930444A02Rik	0.0144928	0
4930453N24Rik	0.073913	0
4930455F23Rik	0.00724638	0
4930471M23Rik	0.0869565	0.0714286
4930480K15Rik	0.00724638	0
4930481A15Rik	0.00724638	0
4930507D05Rik	0.00724638	0
4930512B01Rik	0.00724638	0.25
4930513N10Rik	0.00724638	0
4930523C07Rik	0.168841	0.311321
4930526I15Rik	0.111594	1
4930534B04Rik	0.0130435	0
4930539E08Rik	0.00869565	0
4930547N16Rik	0.00434783	0
4930572J05Rik	0.00724638	0.5
4930578C19Rik	0.0289855	0
4930579G24Rik	0.00434783	0.0967742
4930583H14Rik	0.0217391	1
4930590J08Rik	0.00724638	1
4931406C07Rik	0.0253623	0
4931406H21Rik	0.0181159	0.3
4931406P16Rik	0.126812	0
4931408A02Rik	0.0289855	0.25
4931428F04Rik	0.00724638	0
4931431C16Rik	0.0108696	0
4931440F15Rik	0.00724638	1
4932415G12Rik	0.0188406	0.230769
4932438A13Rik	0.194203	0.163043
4933403F05Rik	0.150725	0
4933406I18Rik	0.0434783	0
4933407C03Rik	0.280435	0.438045
4933407H18Rik	0.0471014	0.498155
4933421E11Rik	0.00724638	0.0990099
4933424B01Rik	0.184058	0.0884956
4933426M11Rik	0.111594	0
4933431E20Rik	0.00724638	0
4933433P14Rik	0.0978261	0
4933434E20Rik	0.210145	0.55624
4933439C10Rik	0.00434783	1
4933439F18Rik	0.0985507	0.513274
5031425E22Rik	0.0405797	1
5031426D15Rik	0.0652174	0
5031439G07Rik	0.0188406	0.60396
5033403H07Rik	0.0217391	0
5033414D02Rik	0.0862319	0.751381
5133401N09Rik	0.0536232	0.547619
5330417C22Rik	0.065942	0
5330426P16Rik	0.0362319	0
5330434G04Rik	0.00724638	0
5430405H02Rik	0.00724638	0
5430407P10Rik	0.00724638	0.6
5430411K18Rik	0.0289855	0.375
5430416N02Rik	0.00724638	0.333333
5430417L22Rik	0.221739	0.29562
5430427M07Rik	0.00869565	0
5430427O19Rik	0.0144928	0
5430435G22Rik	0.0543478	0.205882
5430437P03Rik	0.326087	0.975042
5530601H04Rik	0.00724638	0
5730403B10Rik	0.149275	0
5730409E04Rik	0.0289855	0
5730419I09Rik	0.00434783	0.588235
5730437N04Rik	0.127536	0.951456
5730455O13Rik	0.00434783	1
5730455P16Rik	0.0217391	0
5730469M10Rik	0.0615942	0.472222
5730494M16Rik	0.0144928	0.15873
5730494N06Rik	0.0478261	0.197044
5730508B09Rik	0.0115942	0
5730528L13Rik	0.0507246	0
5730559C18Rik	0.0608696	0.142857
5730590G19Rik	0.0130435	0
5830416P10Rik	0.026087	0.0909091
5830417I10Rik	0.0144928	1
5830432E09Rik	0.00434783	1
5830433M19Rik	0.0217391	0
5930412G12Rik	0.057971	0
5930416I19Rik	0.0942029	0.267442
5930434B04Rik	0.0362319	0
6030419C18Rik	0.0217391	0.333333
6030422M02Rik	0.00434783	0
6030446N20Rik	0.0144928	0
6030458C11Rik	0.0347826	0.208333
6230427J02Rik	0.0913043	1
6330403K07Rik	0.0362319	0.666667
6330406I15Rik	0.119565	0.186047
6330407A03Rik	0.00434783	0.357143
6330407J23Rik	0.0144928	0.666667
6330408A02Rik	0.0217391	0
6330409N04Rik	0.105072	0
6330416G13Rik	0.026087	0
6330418K02Rik	0.00724638	0
6330439K17Rik	0.00724638	0
6330503K22Rik	0.00724638	0.285714
6330512M04Rik	0.0405797	0.883721
6330578E17Rik	0.1	0.0194175
6430527G18Rik	0.155797	0.766667
6430548M08Rik	0.0594203	0
6430573F11Rik	0.0217391	0.25
6430704M03Rik	0.0144928	0
6530401N04Rik	0.00434783	1
6530402F18Rik	0.00724638	0
6720401G13Rik	0.0144928	0
6720456B07Rik	0.233333	0.691729
6720456H20Rik	0.0623188	0
6720489N17Rik	0.00434783	0
8430406I07Rik	0.00869565	0
8430408G22Rik	0.197101	0.804094
8430410A17Rik	0.0478261	0.246914
8430410K20Rik	0.0615942	0.0882353
8430419L09Rik	0.0731884	0.165746
9030224M15Rik	0.0507246	0.181818
9030425E11Rik	0.0724638	0.428571
9030617O03Rik	0.0246377	0.37037
9030619P08Rik	0.026087	0
9030624J02Rik	0.28913	0.0104348
9030625A04Rik	0.0217391	0
9130011J15Rik	0.241304	0.0991453
9130017N09Rik	0.026087	0
9130019O22Rik	0.00434783	0
9130019P16Rik	0.0217391	1
9130206I24Rik	0.00869565	0.375
9130401M01Rik	0.112319	0.324324
9130404H23Rik	0.00869565	0
9230114K14Rik	0.0144928	0.6
9330020H09Rik	0.0144928	0
9330151L19Rik	0.0289855	0
9330158H04Rik	0.00724638	0
9330159F19Rik	0.0434783	0
9330182L06Rik	0.0362319	0
9430008C03Rik	0.00724638	0
9430015G10Rik	0.0115942	0
9430016H08Rik	0.0507246	0.172414
9430020K01Rik	0.282609	0
9430023L20Rik	0.312319	0.887279
9530008L14Rik	0.0666667	0.130435
9530026P05Rik	0.0144928	0.4
9530068E07Rik	0.547101	0
9530077C05Rik	0.00724638	0
9530082P21Rik	0.0217391	0.761905
9530091C08Rik	0.0326087	0.16
9630013A20Rik	0.00724638	0
9630033F20Rik	0.00434783	1
9830001H06Rik	0.0876812	0
9830107B12Rik	0.0144928	0
9930021J03Rik	0.0630435	0.122699
9930111J21Rik1	0.0188406	0.769231
A030009H04Rik	0.00724638	0
A130022J15Rik	0.101449	0
A130040M12Rik	0.385507	1
A1bg	0.0217391	1
A230046K03Rik	0.202899	0
A230050P20Rik	0.084058	1
A230057D06Rik	0.0181159	1
A2ld1	0.0434783	0.545455
A330023F24Rik	0.0434783	0.222222
A330049M08Rik	0.00724638	0.75
A330069E16Rik	0.00434783	1
A330076H08Rik	0.0289855	0.75
A430005L14Rik	0.108696	0.416667
A430035B10Rik	0.0217391	0
A430078G23Rik	0.0173913	0
A430084P05Rik	0.0195652	0.4375
A430105I19Rik	0.0144928	0.833333
A430107O13Rik	0.115942	0
A430110N23Rik	0.0398551	0
A4galt	0.137681	0
A530032D15Rik	0.0253623	1
A530054K11Rik	0.0188406	0
A530058N18Rik	0.00724638	0
A530064D06Rik	0.0188406	0
A630001G21Rik	0.00869565	0
A630007B06Rik	0.25	0.0533881
A630033H20Rik	0.0188406	0
A630055G03Rik	0.00869565	0.5
A630072M18Rik	0.0289855	0
A630089N07Rik	0.00434783	0
A730011L01Rik	0.00724638	0.454545
A730017C20Rik	0.00724638	0.5
A730020M07Rik	0.00724638	0
A830007P12Rik	0.128986	0
A830010M20Rik	0.0115942	0
A830080D01Rik	0.0333333	0
A830082N09Rik	0.00724638	0.666667
A830093I24Rik	0.00724638	0.5
A930001N09Rik	0.152899	0.0150754
A930003O13Rik	0.0144928	0.5
A930005H10Rik	0.00434783	0.230769
A930011O12Rik	0.00724638	1
A930012L18Rik	0.00724638	0.5
A930013F10Rik	0.00724638	0
A930015D03Rik	0.00724638	1
A930038C07Rik	0.0289855	0
AA465934	0.00724638	0
AA467197	0.0304348	0.285714
AA960436	0.00434783	0.117647
AA986860	0.0847826	0.145985
AA987161	0.0246377	0
AB124611	0.0362319	0.852941
AF251705	0.105797	0.664671
AF529169	0.00724638	0
AI314180	0.076087	0
AI314976	0.0601449	0.632353
AI316807	0.0253623	0.333333
AI413582	0.0688406	0.181818
AI428936	0.0217391	0.5
AI462493	0.0978261	0.416667
AI464131	0.0471014	0
AI467606	0.0681159	0.270992
AI480653	0.0543478	0
AI504432	0.0405797	0
AI506816	0.015942	0
AI593442	0.00724638	0
AI597468	0.19058	0.414062
AI597479	0.00724638	0.146341
AI607873	0.134783	0
AI646023	0.00724638	1
AI662270	0.034058	0.554348
AI836003	0.0289855	0.75
AI837181	0.0492754	0
AI846148	0.0615942	0
AI848100	0.155797	0.115607
AI848285	0.00869565	0.5
AI854517	0.0144928	1
AI987944	0.0144928	0.29703
AK010878	0.00724638	0
AK129341	0.0108696	0
AU019823	0.0507246	0
AU021092	0.0434783	0.444444
AU022252	0.00724638	0
AU023871	0.0144928	0
AU040320	0.0478261	0.365079
AW011738	0.0144928	0
AW112010	0.213043	0.638672
AW209491	0.0594203	0.143498
AW495222	0.00724638	1
AW549877	0.0695652	0.238095
AW551984	0.0942029	0
AW554918	0.026087	0.30303
AW555464	0.0369565	0.366197
Aaas	0.0144928	0
Aacs	0.108696	0.0471698
Aadac	0.0304348	0.285714
Aadat	0.0217391	0
Aagab	0.186957	0
Aak1	0.0471014	0.0728155
Aamp	0.331884	0.72118
Aars	0.280435	0.119048
Aars2	0.0304348	0
Aarsd1	0.0971014	0.957265
Aasdhppt	0.112319	0
Aass	0.0217391	0
Aatf	0.108696	0
Abat	0.0942029	0.705882
Abca1	0.232609	0
Abca12	0.0434783	0.166667
Abca13	0.00869565	0
Abca2	0.00724638	0.545455
Abca5	0.0144928	0
Abca6	0.0471014	0
Abca8a	0.141304	0.0487805
Abca8b	0.0869565	0
Abca9	0.171014	0
Abcb10	0.0362319	0
Abcb11	0.0217391	0
Abcb1a	0.0231884	0
Abcb1b	0.0652174	0.222222
Abcb6	0.0304348	0.795455
Abcb7	0.015942	0
Abcb8	0.112319	0.0545455
Abcb9	0.0108696	0.428571
Abcc1	0.057971	0
Abcc2	0.00434783	0.833333
Abcc3	0.144203	0.150754
Abcc4	0.105797	0.0854701
Abcc5	0.0434783	0.235294
Abcc6	0.00724638	0
Abcc8	0.0398551	0.642857
Abcc9	0.0615942	0
Abcd1	0.0862319	0.164384
Abcd2	0.0927536	0.234375
Abcd3	0.223913	0.181159
Abcd4	0.0289855	0
Abce1	0.16087	0
Abcf1	0.127536	0.644628
Abcf2	0.27971	0.021544
Abcf3	0.178261	0.0547445
Abcg1	0.195652	0.609375
Abcg2	0.280435	0
Abcg3	0.0217391	0.157895
Abcg4	0.00724638	0
Abcg5	0.0217391	0
Abhd1	0.00724638	0
Abhd10	0.00724638	0
Abhd11	0.100725	0.852941
Abhd12	0.184783	0.371134
Abhd12b	0.0144928	0
Abhd13	0.271014	0
Abhd14a	0.0217391	0.655172
Abhd14b	0.0347826	0.476
Abhd15	0.0847826	0
Abhd16a	0.173913	0.499062
Abhd2	0.0702899	0
Abhd3	0.0144928	0
Abhd4	0.393478	0.0246002
Abhd5	0.125362	0.197628
Abhd6	0.0811594	0.473684
Abhd8	0.0304348	0.934641
Abi1	0.252174	0.0728477
Abi2	0.026087	0.0789474
Abi3	0.239855	1
Abi3bp	0.134058	0
Abl1	0.0253623	0.378788
Abl2	0.198551	0.0294985
Ablim1	0.436957	0.128755
Ablim2	0.0144928	0.5
Ablim3	0.0942029	0.484848
Abp1	0.026087	0
Abr	0.0746377	0
Abt1	0.0449275	0.165605
Abtb1	0.0405797	0.410714
Abtb2	0.101449	0
Acaa1a	0.2	0.330341
Acaa1b	0.0289855	0.866667
Acaa2	0.297826	0.239165
Acaca	0.00434783	0
Acacb	0.00724638	0
Acad11	0.137681	0.0701754
Acad12	0.0217391	0
Acad8	0.084058	0
Acad9	0.171739	0
Acadl	0.286232	0.318979
Acadm	0.126812	0.273839
Acads	0.0391304	0.5625
Acadsb	0.344928	0
Acadvl	0.292754	0.0806878
Acap1	0.0608696	0
Acap2	0.236232	0.0453515
Acap3	0.057971	0
Acat1	0.228261	0.191489
Acat2	0.0826087	0.107143
Acbd3	0.246377	0
Acbd4	0.0623188	0.657534
Acbd5	0.145652	0
Acbd6	0.104348	0.921569
Accn1	0.00724638	0
Accn2	0.00724638	0
Accsl	0.0434783	0
Acd	0.057971	1
Ace	0.0942029	0.133333
Ace2	0.0833333	0.535714
Acer1	0.0362319	0.571429
Acer2	0.0688406	0.342105
Acer3	0.194203	0.0386598
Ache	0.00724638	0.2
Acin1	0.117391	0.403974
Acly	0.457971	0.134961
Acnat1	0.0608696	0
Aco1	0.136232	0.0887574
Aco2	0.507971	0.0321199
Acot1	0.0507246	0.416667
Acot11	0.0181159	0.333333
Acot12	0.0217391	0
Acot13	0.0905797	0.155556
Acot2	0.0884058	0.11194
Acot7	0.227536	0.379545
Acot8	0.231884	0.975
Acot9	0.21087	0.110236
Acox1	0.226087	0
Acox2	0.0217391	0
Acox3	0.0130435	0
Acp1	0.142029	0.476998
Acp2	0.130435	0
Acp5	0.108696	0.661017
Acp6	0.026087	0.705882
Acpl2	0.0362319	0
Acpp	0.0188406	0
Acsbg1	0.101449	0
Acsf2	0.0144928	0
Acsf3	0.0152174	0.483871
Acsl1	0.0826087	0
Acsl3	0.198551	0.193966
Acsl4	0.134058	0.552486
Acsl5	0.395652	0.0308642
Acsl6	0.0144928	0
Acsm3	0.0304348	0
Acss1	0.0608696	0.137457
Acss2	0.117391	0.154799
Acta1	0.0797101	0.454545
Acta2	0.373188	0.656296
Actb	0.571014	0.128159
Actc1	0.0217391	0.75
Actg1	0.584783	0.268959
Actg2	0.0434783	0
Actl6a	0.173913	0.108808
Actn1	0.0913043	0
Actn3	0.0144928	0
Actn4	0.499275	0.0954774
Actr10	0.186957	0.323045
Actr1a	0.276087	0
Actr1b	0.157971	0.125828
Actr2	0.418841	0.0751979
Actr3	0.655797	0.0123355
Actr3b	0.00724638	0
Actr5	0.00724638	0
Actr6	0.0144928	0.666667
Actr8	0.110145	0.0717703
Acvr1	0.0434783	0
Acvr2a	0.101449	0
Acvr2b	0.00724638	1
Acvrl1	0.152174	0.258065
Acy1	0.0304348	0.59854
Acy3	0.0289855	0
Acyp1	0.00869565	1
Acyp2	0.0144928	1
Adal	0.0144928	0
Adam10	0.584058	0
Adam11	0.00724638	1
Adam12	0.0471014	0
Adam15	0.368841	0.104938
Adam17	0.174638	0.0443787
Adam19	0.0782609	0.0985222
Adam22	0.0362319	0
Adam23	0.0833333	0
Adam28	0.0217391	0
Adam33	0.0362319	1
Adam8	0.0652174	0
Adam9	0.196377	0.0554017
Adamts1	0.40942	0.133333
Adamts12	0.0289855	0
Adamts14	0.0514493	0
Adamts15	0.0543478	0
Adamts17	0.0217391	0.2
Adamts18	0.0217391	0
Adamts2	0.148551	0.115385
Adamts3	0.0217391	0
Adamts4	0.0869565	0.315789
Adamts5	0.105072	0
Adamts7	0.0434783	0.25
Adamts8	0.0289855	0
Adamts9	0.0543478	0
Adamtsl1	0.0905797	0
Adamtsl2	0.076087	0
Adamtsl3	0.0797101	0.461538
Adamtsl4	0.126812	0.177778
Adamtsl5	0.0652174	0.272727
Adap1	0.0362319	0.151515
Adap2	0.134058	0.26971
Adar	0.0362319	0
Adarb1	0.141304	0.0851064
Adat2	0.00724638	0
Adck1	0.076087	0
Adck2	0.0768116	0.0858369
Adck3	0.0811594	0
Adck4	0.12029	0.138889
Adcy1	0.0289855	0.25
Adcy2	0.0289855	0
Adcy3	0.00724638	0
Adcy4	0.0869565	0
Adcy5	0.0217391	0.333333
Adcy6	0.015942	0.146341
Adcy7	0.0333333	0.115385
Adcy9	0.0507246	0.529412
Adcyap1	0.00724638	0
Adcyap1r1	0.00724638	0
Add1	0.515217	0.0735294
Add3	0.42029	0.0740741
Adh1	0.272464	0.487037
Adh4	0.0217391	0
Adh5	0.157246	0.698011
Adh7	0.0869565	0.347826
Adhfe1	0.0434783	0
Adi1	0.15	0.0451467
Adipor1	0.350725	0.127517
Adipor2	0.206522	0
Adk	0.260145	0.200361
Adm	0.115942	0.448718
Adnp	0.164493	0.0840336
Adnp2	0.00724638	0
Ado	0.369565	0.0868902
Adora1	0.0144928	0
Adora2a	0.0115942	0.707547
Adora2b	0.0333333	0.396825
Adpgk	0.128986	0.0882353
Adprh	0.128261	0.505415
Adprhl1	0.00724638	0
Adprhl2	0.026087	0.679775
Adra2a	0.015942	0
Adra2b	0.0181159	0
Adrb1	0.0507246	0
Adrb2	0.326812	0.0190476
Adrbk1	0.0992754	0.188073
Adrbk2	0.0108696	0.583333
Adrm1	0.58913	1
Adsl	0.207971	0.109756
Adss	0.281159	0
Adssl1	0.015942	0.287671
Aebp1	0.15942	0.740741
Aebp2	0.142029	0.148515
Aen	0.101449	0.15625
Aes	0.98913	1
Afap1	0.137681	0.111111
Afap1l1	0.113043	0
Afap1l2	0.0652174	0
Aff1	0.336957	0.0566038
Aff2	0.0152174	0
Aff3	0.0971014	0.142857
Aff4	0.52029	0.0545455
Afg3l1	0.0507246	0.125
Afg3l2	0.299275	0
Afmid	0.00869565	1
Aftph	0.307246	0
Aga	0.194203	0.51087
Agap1	0.105797	0
Agap2	0.00869565	0.842105
Agap3	0.127536	0.60177
Agbl1	0.00434783	0
Agbl4	0.00724638	1
Agfg1	0.31087	0
Agfg2	0.0413043	0
Aggf1	0.0275362	0
Agk	0.143478	0
Agl	0.026087	0.322581
Agmat	0.0217391	0
Agmo	0.108696	0
Agpat1	0.105797	0.752212
Agpat2	0.0623188	0.248619
Agpat3	0.119565	0.20339
Agpat4	0.137681	0.341216
Agpat5	0.0913043	0.171315
Agpat6	0.239855	0
Agpat9	0.00434783	0
Agps	0.105072	0
Agr2	0.1	0.913043
Agrn	0.126812	0.139535
Agt	0.0434783	1
Agtpbp1	0.0297101	0
Agtr1a	0.0253623	0
Agtr1b	0.0217391	0
Agtr2	0.0144928	0
Agtrap	0.065942	0
Agxt2	0.0217391	0.5
Agxt2l1	0.0217391	0.25
Agxt2l2	0.00434783	0
Ahctf1	0.323913	0
Ahcy	0.101449	0.0830189
Ahcyl1	0.242754	0
Ahcyl2	0.148551	0.101961
Ahdc1	0.0144928	0
Ahnak	0.457246	0.107015
Ahr	0.0362319	0
Ahsa1	0.242754	0.509565
Ahsa2	0.0869565	0.0641026
Ahsg	0.0362319	0.7
Aida	0.0869565	0
Aif1	0.0586957	0.789157
Aif1l	0.0688406	0.321429
Aifm1	0.132609	0.0402685
Aifm3	0.00724638	0
Aig1	0.0905797	0.546828
Aim1	0.084058	0
Aim1l	0.0956522	0
Aim2	0.0231884	0
Aimp1	0.18913	0.875346
Aimp2	0.104348	0.451128
Aip	0.103623	0.530026
Airn	0.0326087	0
Ak1	0.0869565	0.641026
Ak2	0.201449	0.532847
Ak3	0.466667	0
Ak5	0.00724638	0
Akap1	0.00724638	0.75
Akap10	0.0115942	0
Akap11	0.0623188	0.0549451
Akap12	0.212319	0.111607
Akap13	0.422464	0.189223
Akap2	0.23913	0.100671
Akap5	0.00724638	0.333333
Akap6	0.0217391	0
Akap7	0.00724638	0.153846
Akap8	0.0637681	0.587983
Akap8l	0.0768116	0.660633
Akap9	0.158696	0.156812
Akirin1	0.419565	0.039267
Akirin2	0.0405797	0.208333
Akna	0.0971014	0
Aknad1	0.0144928	1
Akr1a1	0.323188	0.638106
Akr1b10	0.00724638	0
Akr1b8	0.0971014	0.378049
Akr1c12	0.0391304	0.444444
Akr1c13	0.0304348	0.285714
Akr1c14	0.0557971	0
Akr1c18	0.0217391	0.7
Akr1c19	0.0391304	0.674419
Akr1c20	0.0217391	0
Akr1c21	0.0217391	0.5
Akr1c6	0.0217391	0
Akr1d1	0.0217391	0
Akr1e1	0.0572464	0.383117
Akr7a5	0.0913043	0.869792
Akt1	0.347826	0.186684
Akt1s1	0.407971	1
Akt2	0.27029	0
Akt3	0.0188406	0
Aktip	0.108696	0.097561
Alad	0.148551	0.744246
Alas1	0.248551	0.0520325
Alas2	0.0289855	0.5
Alb	0.0550725	0.789474
Alcam	0.171739	0.315315
Aldh16a1	0.0623188	0.114537
Aldh18a1	0.139855	0
Aldh1a1	0.134783	0.110169
Aldh1a2	0.0543478	0.176471
Aldh1a3	0.0217391	1
Aldh1a7	0.0217391	0
Aldh1b1	0.0608696	0.634615
Aldh1l1	0.0391304	0
Aldh1l2	0.00724638	1
Aldh2	0.373188	0.705018
Aldh3a1	0.0507246	0.777778
Aldh3a2	0.147101	0
Aldh3b1	0.05	0.5625
Aldh3b2	0.0884058	0.0697674
Aldh4a1	0.0942029	0
Aldh5a1	0.00724638	0.333333
Aldh6a1	0.201449	0.0735294
Aldh7a1	0.130435	0.19403
Aldh8a1	0.0217391	0
Aldh9a1	0.181884	0.140787
Aldoa	0.449275	0.710366
Aldob	0.042029	0.680851
Aldoc	0.084058	0.807692
Alg1	0.0434783	0
Alg10b	0.0144928	0
Alg11	0.107246	0.168539
Alg12	0.00724638	0
Alg14	0.0652174	0.377778
Alg2	0.0405797	0.211268
Alg3	0.0449275	0.120219
Alg5	0.141304	0.40625
Alg8	0.00434783	0.428571
Alg9	0.015942	0
Alkbh1	0.0869565	0
Alkbh4	0.0217391	0.232558
Alkbh5	0.494928	0.0355872
Alkbh6	0.0666667	0.830918
Alkbh7	0.015942	0.255319
Alox12b	0.0217391	0
Alox12e	0.0144928	0.5
Alox5	0.0413043	0
Alox5ap	0.0927536	0.817143
Alox8	0.0144928	0
Alpi	0.00869565	0
Alpk1	0.0144928	0
Alpk2	0.00724638	0
Alpk3	0.00724638	0
Alpl	0.101449	0.3125
Als2	0.0217391	0
Als2cl	0.0507246	0
Als2cr4	0.00724638	0
Alyref	0.115942	0.25
Alyref2	0.00434783	1
Amacr	0.0507246	0.1
Ambp	0.0398551	1
Ambra1	0.0115942	1
Amdhd1	0.026087	0.166667
Amdhd2	0.0130435	0.785714
Amfr	0.602899	0.13346
Amica1	0.0144928	0
Amigo1	0.0217391	0
Amigo2	0.0434783	0
Ammecr1	0.026087	0.107143
Ammecr1l	0.0623188	0.105932
Amn1	0.00724638	0.6
Amotl1	0.275362	0.0786517
Amotl2	0.0289855	0.1875
Ampd2	0.0369565	0.3125
Ampd3	0.0442029	0.127389
Amph	0.0144928	0
Amy1	0.0326087	0.666667
Amz1	0.0144928	0.394737
Amz2	0.0224638	0.144578
Anapc1	0.0188406	0
Anapc10	0.0115942	0.0625
Anapc11	0.615217	1
Anapc13	0.113768	0.0549451
Anapc16	0.0782609	0.183908
Anapc2	0.436232	0.0480549
Anapc4	0.234058	0
Anapc5	0.394203	0.0986214
Anapc7	0.117391	0.0909091
Ang	0.142029	0.388889
Angel2	0.0405797	0.542373
Angpt1	0.0115942	0
Angpt2	0.0253623	0
Angpt4	0.0253623	0
Angptl1	0.076087	0.08
Angptl2	0.184783	0.175439
Angptl3	0.0217391	0
Angptl4	0.246377	0.0863724
Ank	0.150725	0.107143
Ank1	0.0289855	0.5
Ank2	0.0905797	0.0967742
Ank3	0.117391	0
Ankdd1b	0.00724638	1
Ankfn1	0.00724638	0
Ankfy1	0.0202899	0
Ankhd1	0.234058	0
Ankib1	0.0333333	0
Ankle2	0.355072	0.0199734
Ankmy2	0.0797101	0
Ankrd10	0.242754	0.0317125
Ankrd11	0.318116	0.145396
Ankrd12	0.0746377	0.412371
Ankrd13a	0.371739	0.120739
Ankrd13c	0.0507246	0
Ankrd13d	0.00724638	0.5
Ankrd16	0.00869565	1
Ankrd17	0.186957	0
Ankrd22	0.0623188	0
Ankrd26	0.00724638	0
Ankrd27	0.057971	0.216867
Ankrd28	0.0434783	0.117647
Ankrd29	0.0724638	0.214286
Ankrd32	0.00724638	0
Ankrd33b	0.0362319	0.12766
Ankrd34a	0.00724638	0
Ankrd34b	0.00724638	0
Ankrd35	0.0289855	0
Ankrd37	0.00724638	1
Ankrd39	0.00724638	0.26087
Ankrd40	0.00724638	0.652174
Ankrd44	0.22029	0
Ankrd46	0.155072	0
Ankrd50	0.0362319	0
Ankrd54	0.0376812	0.0846561
Ankrd6	0.0289855	0
Ankrd9	0.0434783	0.29703
Anks1	0.0333333	0.283019
Anks1b	0.00724638	0
Anks3	0.0144928	0
Anks4b	0.00869565	0
Anks6	0.0217391	0
Ankzf1	0.00724638	0
Anln	0.0391304	0
Ano1	0.112319	0.394737
Ano10	0.194928	0
Ano3	0.0144928	0.5
Ano4	0.0144928	0.5
Ano6	0.223913	0.0690423
Ano9	0.00869565	0
Anp32a	0.395652	0.494673
Anp32b	0.395652	0.941263
Anp32e	0.268116	0.85084
Anpep	0.0362319	0.6
Antxr1	0.188406	0
Antxr2	0.242029	0
Anxa1	0.295652	0.491667
Anxa11	0.0478261	0.30303
Anxa2	0.505797	0.615698
Anxa3	0.178986	0.679012
Anxa4	0.357246	0.10274
Anxa5	0.399275	0.463385
Anxa6	0.445652	0.1
Anxa7	0.373188	0.0220264
Anxa8	0.148551	0.644444
Aoah	0.0173913	0
Aoc3	0.0144928	0
Aox3	0.0434783	0.125
Aox4	0.0217391	0
Ap1ar	0.141304	0.0385852
Ap1b1	0.251449	0.0676692
Ap1g1	0.16087	0
Ap1g2	0.0550725	0
Ap1m1	0.133333	0.166667
Ap1m2	0.0304348	0.285714
Ap1s1	0.176087	0.684685
Ap1s2	0.165942	0
Ap2a1	0.0449275	0.45098
Ap2a2	0.274638	0.0777202
Ap2b1	0.0688406	0.228571
Ap2m1	0.478261	0.0777778
Ap2s1	0.535507	0.983589
Ap3b1	0.391304	0.0416089
Ap3b2	0.0507246	0
Ap3d1	0.221739	0.101594
Ap3m1	0.233333	0
Ap3s1	0.158696	0.0207612
Ap3s2	0.00434783	0.609756
Ap4b1	0.00724638	0
Ap4e1	0.0434783	0
Ap4m1	0.0217391	0
Ap4s1	0.102899	0.925094
Apaf1	0.0594203	0.132743
Apba1	0.0507246	0.571429
Apba2	0.0144928	0
Apba3	0.181884	0.0890208
Apbb1	0.0289855	0
Apbb1ip	0.196377	0.913295
Apbb2	0.148551	0.0675676
Apbb3	0.00724638	0
Apc	0.47029	0.0392157
Apcdd1	0.0869565	0
Apcs	0.0217391	0.333333
Apeh	0.210145	0.115473
Apex1	0.0565217	0.66443
Apex2	0.0217391	0
Aph1a	0.152899	0.0383142
Aph1b	0.0181159	0
Aph1c	0.0217391	0
Api5	0.427536	0.0384123
Apip	0.0442029	0.339623
Apitd1	0.00434783	1
Aplf	0.0115942	0.375
Apln	0.0144928	0
Aplnr	0.0543478	0
Aplp1	0.17971	0.409091
Aplp2	0.585507	0.098646
Apoa1	0.057971	0.75
Apoa1bp	0.228261	0.891304
Apoa2	0.0507246	0.555556
Apoa4	0.0217391	1
Apoa5	0.0217391	1
Apob	0.0521739	0.882353
Apobec1	0.0615942	0.310606
Apobec2	0.00724638	0
Apobec3	0.168116	0.579096
Apobr	0.0188406	0.384615
Apoc1	0.0724638	0.73913
Apoc2	0.026087	0.107143
Apoc3	0.0217391	0.25
Apoc4	0.0217391	0
Apod	0.152174	0.854839
Apoe	0.774638	0.921162
Apoh	0.0217391	1
Apol10a	0.00869565	0
Apol10b	0.0434783	1
Apol7a	0.0217391	0
Apold1	0.137681	0.522388
Apom	0.0217391	0
Apoo	0.0362319	0.2
Apool	0.0202899	0.791667
App	0.705797	0.0720072
Appbp2	0.323188	0.0221239
Appl1	0.257971	0.0221729
Appl2	0.171739	0.0458716
Aprt	0.236232	0.721461
Aptx	0.026087	0.307692
Aqp1	0.152899	0.64527
Aqp11	0.0594203	0.130435
Aqp3	0.16087	0.213483
Aqp4	0.00724638	0
Aqp5	0.0217391	1
Aqp6	0.00724638	0
Aqp7	0.0652174	0.452381
Aqp8	0.0304348	0.714286
Aqp9	0.0434783	0
Aqr	0.0565217	0.164557
Araf	0.193478	0.315534
Arap1	0.210145	0
Arap2	0.221014	0.0232558
Arap3	0.0144928	0.391304
Arc	0.0746377	0.239362
Arcn1	0.642029	0.0574713
Areg	0.1	0.217391
Arf1	0.472464	0.306509
Arf2	0.126812	0.0206186
Arf3	0.198551	0.130901
Arf4	0.495652	0.139692
Arf5	0.399275	0.972863
Arf6	0.324638	0.355524
Arfgap1	0.174638	0.0188679
Arfgap2	0.244928	0.0333952
Arfgap3	0.12971	0.0526316
Arfgef1	0.065942	0
Arfgef2	0.00724638	0.666667
Arfip1	0.272464	0.0587084
Arfip2	0.0608696	0.304124
Arfrp1	0.0471014	0.403727
Arg1	0.0398551	0.0983607
Arg2	0.0304348	0.166667
Arglu1	0.471014	0.268293
Arhgap1	0.405072	0
Arhgap11a	0.0173913	0
Arhgap12	0.205072	0.0152284
Arhgap15	0.117391	0
Arhgap17	0.0971014	0.190476
Arhgap18	0.0847826	0.260417
Arhgap19	0.0115942	0
Arhgap20	0.0724638	0
Arhgap21	0.180435	0
Arhgap22	0.0217391	0
Arhgap23	0.0398551	0.666667
Arhgap24	0.108696	0.110294
Arhgap25	0.118841	0.056391
Arhgap26	0.166667	0
Arhgap27	0.0536232	0.326316
Arhgap28	0.0362319	0.148148
Arhgap29	0.199275	0
Arhgap30	0.133333	0
Arhgap31	0.0652174	0.238095
Arhgap32	0.0695652	0
Arhgap39	0.00724638	0
Arhgap4	0.0608696	0.232558
Arhgap40	0.0217391	0
Arhgap42	0.0797101	0.413793
Arhgap44	0.0398551	0.485714
Arhgap5	0.445652	0.0307692
Arhgap6	0.0181159	0
Arhgap8	0.0217391	0.333333
Arhgap9	0.0652174	0.314286
Arhgdia	0.885507	0.976415
Arhgdib	0.289855	0.692446
Arhgef1	0.366667	0.214502
Arhgef10	0.0905797	0
Arhgef10l	0.0731884	0
Arhgef11	0.0253623	0
Arhgef12	0.391304	0
Arhgef15	0.0905797	0.114286
Arhgef16	0.0391304	0
Arhgef17	0.0543478	0.166667
Arhgef18	0.015942	0.505618
Arhgef19	0.0797101	0.275862
Arhgef2	0.116667	0.199203
Arhgef25	0.0362319	0
Arhgef26	0.00724638	0.375
Arhgef3	0.315217	0.0530973
Arhgef37	0.00434783	0
Arhgef40	0.123188	0.35
Arhgef5	0.0521739	0
Arhgef6	0.18913	0.0879765
Arhgef7	0.0992754	0.104167
Arhgef9	0.00724638	0
Arid1a	0.0797101	0.419444
Arid1b	0.0405797	0.263158
Arid2	0.0572464	0.131579
Arid4a	0.0681159	0.146341
Arid4b	0.137681	0.226776
Arid5a	0.236232	0.403614
Arid5b	0.181159	0.202312
Arih1	0.261594	0.140515
Arih2	0.0985507	0
Arl1	0.208696	0.191209
Arl10	0.00724638	0
Arl11	0.0188406	0
Arl13b	0.217391	0.708661
Arl14	0.00869565	0
Arl16	0.0144928	0.8
Arl2	0.0956522	0.632353
Arl2bp	0.131159	0.38342
Arl3	0.243478	0.963504
Arl4a	0.192754	0.66242
Arl4c	0.166667	0.4
Arl4d	0.137681	0.347222
Arl5a	0.0775362	0
Arl5b	0.210145	0.298507
Arl5c	0.0557971	0.423963
Arl6	0.00724638	0.285714
Arl6ip1	0.230435	0.560732
Arl6ip4	0.198551	0.930233
Arl6ip5	0.184783	0.637188
Arl6ip6	0.0188406	0.0652174
Arl8a	0.307246	1
Arl8b	0.494203	0
Armc1	0.131884	0
Armc10	0.0550725	0
Armc5	0.16087	0.119403
Armc6	0.0188406	0
Armc8	0.177536	0
Armc9	0.00724638	1
Armcx1	0.0398551	0
Armcx2	0.0876812	0.145631
Armcx3	0.0869565	0
Armcx4	0.0289855	0.153846
Arnt	0.108696	0
Arnt2	0.0217391	0
Arntl	0.147826	0
Arpc1a	0.218116	0.221402
Arpc1b	0.622464	0.895455
Arpc2	0.244203	0.397849
Arpc3	0.671739	0.982729
Arpc4	0.348551	0.839332
Arpc5	0.386957	0.0550898
Arpc5l	0.189855	0.652406
Arpm1	0.00724638	0
Arpp19	0.117391	0.533333
Arpp21	0.0289855	0
Arrb1	0.0217391	0.52381
Arrb2	0.214493	0.94302
Arrdc1	0.0347826	0.543379
Arrdc2	0.0217391	0
Arrdc3	0.293478	0.0650759
Arrdc4	0.102899	0.323887
Arsa	0.134058	0
Arsb	0.223188	0.120321
Arsg	0.0289855	0
Arsi	0.0615942	0
Arsj	0.0362319	0
Arsk	0.0550725	0
Art1	0.0217391	0
Art2b	0.0217391	0.6
Art3	0.0144928	0.380952
Art4	0.0543478	0
Art5	0.00724638	0
Arvcf	0.0217391	0
Arx	0.0108696	1
Arxes1	0.00724638	0
Arxes2	0.00724638	0
As3mt	0.0514493	0.283019
Asah1	0.551449	0.0308642
Asah2	0.0144928	0
Asap1	0.0666667	0.0930233
Asap2	0.0289855	0
Asap3	0.0144928	0
Asb11	0.00724638	0
Asb13	0.0869565	0
Asb14	0.00724638	0
Asb15	0.00724638	0
Asb2	0.0478261	0.214876
Asb3	0.0804348	0
Asb4	0.0144928	0
Asb5	0.057971	0.444444
Asb6	0.101449	0.10989
Asb8	0.0434783	0.0368098
Ascc2	0.0413043	0
Ascc3	0.105797	0.138249
Ascl2	0.00869565	1
Asf1a	0.0913043	0.320388
Asf1b	0.0717391	0.545455
Asgr1	0.0217391	1
Asgr2	0.0217391	1
Ash1l	0.421739	0.00807537
Ash2l	0.175362	0.070922
Asl	0.0391304	0.457364
Asna1	0.0594203	1
Asns	0.144928	0.17094
Asnsd1	0.0753623	0.100503
Aspa	0.0144928	0.285714
Aspdh	0.0217391	0
Asph	0.391304	0.125
Asphd1	0.00724638	1
Asphd2	0.0144928	0
Aspm	0.00434783	0
Aspn	0.101449	0
Aspscr1	0.118116	0.376147
Asrgl1	0.0115942	0.606061
Ass1	0.0434783	1
Aste1	0.0405797	0
Astn1	0.00724638	0
Astn2	0.00724638	0
Asxl1	0.0521739	0.163934
Asxl2	0.0971014	0.0833333
Asz1	0.0217391	1
Atad1	0.378261	0.0417827
Atad2	0.0173913	0
Atad2b	0.0376812	0
Atad3a	0.0521739	0.0538117
Atad5	0.0391304	0
Atat1	0.057971	0.166667
Atcay	0.0144928	0
Ate1	0.121014	0
Atf1	0.21087	0
Atf2	0.218841	0.0595238
Atf3	0.384058	0.485207
Atf4	0.297101	0.6
Atf5	0.076087	0.925926
Atf6	0.274638	0.0404858
Atf6b	0.0449275	0.278351
Atf7ip	0.427536	0.0522876
Atg10	0.00724638	0.307692
Atg12	0.197101	0
Atg13	0.0666667	0
Atg14	0.00724638	0
Atg16l1	0.0362319	0.125
Atg16l2	0.0282609	0.392405
Atg2a	0.0188406	0
Atg2b	0.0217391	0.571429
Atg3	0.176087	0.697917
Atg4a	0.0652174	0
Atg4b	0.0811594	0.0566038
Atg4c	0.00724638	0
Atg4d	0.026087	0.151515
Atg5	0.0333333	0.11976
Atg7	0.0826087	0
Atg9a	0.0731884	0.279503
Athl1	0.0782609	0.0837989
Atic	0.0398551	0
Atl1	0.0144928	0
Atl2	0.356522	0.0986842
Atl3	0.138406	0
Atm	0.0231884	0
Atmin	0.0724638	0.07109
Atn1	0.186232	1
Atoh8	0.0253623	1
Atox1	0.378986	0.232819
Atp10a	0.0289855	0
Atp10b	0.0173913	0
Atp10d	0.0115942	0
Atp11a	0.205072	0.139665
Atp11b	0.168116	0.068323
Atp11c	0.0710145	0
Atp12a	0.00869565	0
Atp13a1	0.227536	0.0501253
Atp13a2	0.102174	0.0258621
Atp13a3	0.197826	0.145349
Atp1a1	0.702899	0.175
Atp1a2	0.134058	0.136364
Atp1a3	0.0231884	0
Atp1b1	0.146377	0.223642
Atp1b2	0.0507246	0
Atp1b3	0.526812	0.0429799
Atp2a1	0.0188406	0.146341
Atp2a2	0.350725	0.152801
Atp2a3	0.171739	0.21645
Atp2b1	0.172464	0.193603
Atp2b2	0.00724638	0
Atp2b4	0.178261	0.0687285
Atp2c1	0.247826	0.210177
Atp2c2	0.0173913	0.647059
Atp5a1	0.434058	0.217434
Atp5b	0.510145	0.136508
Atp5c1	0.401449	0.690367
Atp5d	0.432609	0.887665
Atp5e	0.518841	0.0614137
Atp5f1	0.323913	0.577982
Atp5g1	0.418116	0.52187
Atp5g2	0.402899	0.985653
Atp5g3	0.368116	0.643579
Atp5h	0.413043	0.449393
Atp5j	0.421739	0.399249
Atp5j2	0.481884	0.232617
Atp5k	0.276812	0.0151134
Atp5l	0.316667	0.689956
Atp5o	0.331884	0.556999
Atp5sl	0.0275362	0.444444
Atp6ap1	0.48913	0.170807
Atp6ap2	0.47029	0.0892857
Atp6v0a1	0.0434783	0.789474
Atp6v0a2	0.0884058	0.123967
Atp6v0b	0.325362	0.770701
Atp6v0c	0.467391	1
Atp6v0d1	0.130435	0.125
Atp6v0e	0.35	0.651282
Atp6v0e2	0.0615942	0.181818
Atp6v1a	0.398551	0
Atp6v1b1	0.0217391	1
Atp6v1b2	0.444928	0.0158395
Atp6v1c1	0.176087	0.138568
Atp6v1d	0.127536	0.729592
Atp6v1e1	0.207971	0.305361
Atp6v1f	0.313768	0.460452
Atp6v1g1	0.292029	0.72408
Atp6v1g2	0.00724638	0.6
Atp6v1h	0.469565	0
Atp7a	0.0144928	0
Atp8a1	0.0521739	0.339506
Atp8a2	0.0507246	0
Atp8b1	0.145652	0
Atp8b2	0.0623188	0.116279
Atp8b4	0.0318841	0
Atp9a	0.260145	0.19802
Atp9b	0.057971	0.198675
Atpaf1	0.0217391	0
Atpaf2	0.0333333	0
Atpbd4	0.057971	0.190476
Atpif1	0.30942	0.593801
Atr	0.0507246	0
Atrip	0.0405797	0.0540541
Atrn	0.28913	0
Atrx	0.391304	0
Atxn1	0.147826	0.394737
Atxn10	0.367391	0.105469
Atxn1l	0.0144928	0
Atxn2	0.0847826	0.257511
Atxn2l	0.0514493	0.70297
Atxn3	0.0217391	0
Atxn7	0.0724638	0
Atxn7l1	0.0362319	0.4
Atxn7l3	0.00434783	0.769231
Atxn7l3b	0.273188	0.188383
Auh	0.057971	0.245902
Aup1	0.294203	0.884674
Aurka	0.0130435	0
Aurkaip1	0.178261	0.76776
Aurkb	0.0130435	0
Auts2	0.0543478	0.263158
Avl9	0.042029	0
Avpi1	0.108696	0.5
Avpr1a	0.0434783	0
Axin1	0.118841	0.145631
Axl	0.242754	0.0821918
Azgp1	0.0217391	0
Azi1	0.00434783	0
Azi2	0.102899	0.142857
Azin1	0.389855	0.0445765
B130024G19Rik	0.00724638	1
B230118H07Rik	0.0362319	0.590909
B230120H23Rik	0.076087	0.145833
B230206F22Rik	0.0231884	0
B230208H17Rik	0.023913	0.290323
B230216N24Rik	0.0434783	0
B230217C12Rik	0.00724638	1
B230219D22Rik	0.291304	0
B230312A22Rik	0.0231884	0
B2m	0.662319	0.856764
B330016D10Rik	0.00724638	0
B3galnt1	0.0905797	0
B3galnt2	0.0637681	0
B3galt1	0.0289855	0
B3galt2	0.00724638	0
B3galt5	0.0246377	0
B3galt6	0.0478261	0
B3galtl	0.0144928	0
B3gat2	0.00724638	0
B3gat3	0.112319	1
B3gnt1	0.134058	0
B3gnt2	0.361594	0.157895
B3gnt3	0.0572464	0
B3gnt5	0.0217391	0.172414
B3gnt6	0.00869565	0
B3gnt7	0.0195652	0.222222
B3gnt8	0.026087	0.5
B3gnt9-ps	0.101449	0
B430306N03Rik	0.00869565	0
B430319G15Rik	0.00724638	0
B4galnt1	0.122464	0.702929
B4galnt2	0.00869565	0
B4galnt4	0.00724638	1
B4galt1	0.342754	0.180124
B4galt2	0.0362319	0
B4galt3	0.0289855	0
B4galt4	0.105072	0
B4galt5	0.0217391	1
B4galt6	0.101449	0
B4galt7	0.0362319	0.333333
B630005N14Rik	0.0144928	0
B830017H08Rik	0.0108696	1
B930041F14Rik	0.00724638	0
B9d1	0.0362319	0.191176
B9d2	0.026087	1
BB031773	0.0217391	0
BC002230	0.00724638	0
BC003266	0.103623	0.556075
BC003331	0.0724638	0.153846
BC003965	0.102899	0.340278
BC004004	0.169565	0.785714
BC005537	0.181884	0.192171
BC005561	0.126812	0.204082
BC005624	0.173913	0.931193
BC005764	0.0333333	0.491803
BC006779	0.0108696	0
BC013529	0.203623	0.136054
BC013712	0.026087	0.368852
BC016423	0.084058	0
BC016579	0.0173913	0
BC017158	0.0362319	0.157895
BC017612	0.423913	1
BC017643	0.193478	0.093361
BC017647	0.0514493	0
BC018507	0.0115942	0
BC020535	0.00724638	0
BC021614	0.0217391	1
BC022687	0.0362319	0
BC023829	0.137681	0
BC024386	0.0217391	0
BC024479	0.00434783	0
BC024582	0.00434783	0
BC024659	0.0188406	1
BC026590	0.0217391	0
BC028528	0.0362319	0.540541
BC029214	0.0115942	1
BC029722	0.218841	0.97543
BC030336	0.0188406	0.634146
BC030867	0.0144928	0.769231
BC031181	0.313043	0.89426
BC031353	0.0376812	0
BC031781	0.134783	0.699367
BC032203	0.0188406	0
BC035044	0.0217391	0
BC037032	0.00724638	1
BC037034	0.00434783	1
BC037704	0.0144928	0
BC046331	0.0797101	0
BC046404	0.0108696	0.365854
BC048355	0.00434783	1
BC048546	0.0543478	0
BC049352	0.00434783	0
BC049635	0.00724638	1
BC052040	0.00434783	0
BC053749	0.00434783	0.375
BC055004	0.0108696	0
BC055324	0.00869565	0
BC056474	0.166667	0.903226
BC057079	0.0289855	0.2
BC064078	0.0478261	1
BC067068	0.00724638	0
BC094916	0.0297101	0
BC096441	0.0144928	0.8
BC100530	0.0144928	0
BC147527	0.00434783	0
Baalc	0.0289855	0.6
Baat	0.0217391	0
Baat1	0.0333333	0
Bace1	0.131884	0.171233
Bace2	0.108696	0
Bach1	0.257971	0
Bach2	0.0456522	0.0416667
Bad	0.17029	0.916898
Bag1	0.263768	0.606164
Bag2	0.0724638	0
Bag3	0.262319	0.514925
Bag4	0.057971	0
Bag5	0.152174	0.151134
Bag6	0.0746377	0.932886
Bahcc1	0.00724638	1
Bahd1	0.0144928	0.565217
Bai1	0.0144928	1
Bai3	0.00724638	1
Baiap2	0.17029	0.289855
Baiap2l1	0.12971	0.031746
Baiap2l2	0.0173913	1
Baiap3	0.0253623	0.853659
Bambi	0.192029	0.204545
Bambi-ps1	0.0144928	0.25
Banf1	0.291304	0.437956
Bank1	0.0695652	0
Banp	0.0442029	0.106061
Bap1	0.155072	0
Barhl1	0.00724638	0
Barhl2	0.00724638	0
Barx2	0.0797101	1
Basp1	0.17971	1
Batf	0.0666667	0.825581
Batf3	0.00434783	1
Bax	0.128986	0.835616
Baz1a	0.0855072	0.422535
Baz1b	0.206522	0.015544
Baz2a	0.25	0.0334821
Baz2b	0.341304	0.0943396
Bbc3	0.130435	1
Bbip1	0.0115942	0.62963
Bbox1	0.057971	0.333333
Bbs2	0.0326087	0
Bbs4	0.00724638	0
Bbs5	0.00724638	0
Bbs9	0.0362319	0.480769
Bbx	0.0652174	0.0952381
Bcam	0.184783	0.285714
Bcan	0.0217391	0
Bcap29	0.0297101	0
Bcap31	0.286232	0.349462
Bcar1	0.128261	0.303136
Bcar3	0.0942029	0.0512821
Bcas1	0.015942	0.238095
Bcas2	0.103623	0.542683
Bcas3	0.0724638	0.0568182
Bcat1	0.0543478	0
Bcat2	0.026087	0.701299
Bccip	0.157246	0.514925
Bche	0.0471014	0
Bckdha	0.131884	0.663793
Bckdhb	0.00724638	0
Bckdk	0.0768116	0.225309
Bcl10	0.228261	0.424184
Bcl11a	0.0152174	0
Bcl11b	0.057971	0.245283
Bcl2	0.1	0.134228
Bcl2a1b	0.0884058	0.77707
Bcl2a1d	0.00434783	0.42623
Bcl2l1	0.284783	0.216216
Bcl2l11	0.0507246	0.292683
Bcl2l12	0.0536232	1
Bcl2l13	0.145652	0
Bcl2l2	0.0217391	0
Bcl3	0.287681	0.751332
Bcl6	0.0797101	0
Bcl6b	0.0144928	0.545455
Bcl7a	0.0275362	0.473684
Bcl7b	0.0615942	0.791667
Bcl7c	0.437681	1
Bcl9	0.00724638	0
Bcl9l	0.12029	1
Bclaf1	0.306522	0.04
Bco2	0.0108696	0
Bcor	0.0376812	0.294118
Bcorl1	0.00724638	0
Bcr	0.0731884	0.40146
Bcs1l	0.00724638	0
Bdh1	0.0536232	0.615385
Bdh2	0.00724638	0
Bdkrb1	0.0289855	0
Bdnf	0.0434783	0.428571
Bdp1	0.123913	0.0460123
Becn1	0.255072	0.141914
Begain	0.00724638	1
Bend3	0.0144928	0
Bend4	0.00724638	0
Bend5	0.0326087	0.529412
Bend6	0.00724638	0
Best3	0.0217391	0
Bet1	0.0869565	0.291667
Bet1l	0.0355072	0.603659
Beta-s	0.137681	0.891304
Bex1	0.0181159	0.285714
Bex2	0.0181159	0.714286
Bex4	0.0282609	0
Bfar	0.207246	0.121495
Bfsp2	0.00724638	1
Bglap2	0.0217391	0
Bgn	0.352899	0.440559
Bhlha15	0.00434783	0.285714
Bhlhb9	0.113768	0
Bhlhe22	0.00724638	0
Bhlhe40	0.384783	0.200893
Bhmt	0.0217391	0.5
Bhmt2	0.0217391	0.5
Bicc1	0.123188	0
Bicd1	0.0289855	0.214286
Bicd2	0.265217	0.0274223
Bid	0.0623188	0
Bik	0.0434783	1
Bin1	0.172464	0.722222
Bin3	0.0384058	0.220472
Birc2	0.0797101	0
Birc3	0.187681	0
Birc5	0.0695652	0.702703
Birc6	0.215942	0.280899
Bivm	0.0115942	0
Blcap	0.164493	0.207493
Blk	0.0188406	0.625
Blmh	0.257246	0.0740741
Blnk	0.1	0.15544
Bloc1s1	0.272464	0.792531
Bloc1s2	0.0768116	0.125
Blvra	0.0376812	0.698276
Blvrb	0.163043	0.662921
Blzf1	0.149275	0
Bmf	0.0217391	0
Bmi1	0.0695652	0.141509
Bmp1	0.173913	0
Bmp10	0.00724638	0
Bmp2	0.102899	0
Bmp2k	0.12971	0
Bmp3	0.0992754	0.0955414
Bmp4	0.0833333	0.166667
Bmp5	0.0652174	0
Bmp6	0.101449	0.333333
Bmp7	0.0797101	0
Bmper	0.076087	0
Bmpr1a	0.177536	0
Bmpr2	0.152174	0
Bms1	0.186957	0
Bmx	0.0217391	0
Bmyc	0.137681	0.812139
Bnc1	0.0217391	0
Bnc2	0.0724638	0
Bnip1	0.0434783	0.142857
Bnip2	0.318116	0.110947
Bnip3	0.174638	0.201511
Bnip3l	0.107971	0.413725
Bnipl	0.0144928	0
Boc	0.135507	0.172414
Bod1	0.084058	0.380435
Bod1l	0.168841	0.173797
Bok	0.092029	0.423387
Bola1	0.110145	0.587156
Bola2	0.0942029	0.176471
Bola3	0.0934783	0.305556
Bop1	0.137681	0.178478
Bpgm	0.0507246	0.25641
Bphl	0.0934783	0.289216
Bpifc	0.0217391	0
Bpnt1	0.139855	0
Bptf	0.228986	0.0332594
Braf	0.252899	0.10395
Brap	0.026087	0.258065
Brca1	0.0173913	0
Brca2	0.00869565	0.714286
Brcc3	0.0376812	0.54717
Brd1	0.147826	0.0743494
Brd2	0.35	0.342715
Brd3	0.2	0.84375
Brd4	0.254348	0.754425
Brd7	0.138406	0.0606061
Brd8	0.0905797	0.059761
Brd9	0.0326087	0.103448
Bre	0.0797101	0.63253
Brf1	0.117391	0
Brf2	0.00724638	0
Bri3	0.718841	1
Bri3bp	0.026087	0.803922
Brip1	0.0130435	0
Brix1	0.201449	0.528536
Brms1	0.0478261	0.668508
Brms1l	0.0144928	0
Brox	0.316667	0
Brp44	0.184058	0.849785
Brp44l	0.194203	0.787535
Brpf1	0.0231884	0
Brpf3	0.00724638	0
Brwd1	0.234058	0
Brwd3	0.0144928	0
Bscl2	0.0753623	0.378486
Bsdc1	0.134783	0.0673401
Bsg	0.828986	0.984484
Bsn	0.015942	1
Bspry	0.0521739	0
Bst1	0.0188406	0.230769
Bst2	0.313043	0.942529
Btaf1	0.133333	0.0625
Btbd1	0.126087	0
Btbd10	0.202174	0.0229358
Btbd16	0.00724638	0
Btbd17	0.00724638	0
Btbd19	0.0434783	0
Btbd2	0.0557971	0.244186
Btbd3	0.137681	0
Btbd6	0.00869565	0.285714
Btbd7	0.0304348	0.142857
Btbd9	0.084058	0
Btd	0.092029	0.165663
Btf3	0.305797	0.756432
Btf3l4	0.0108696	0
Btg1	0.508696	0.249267
Btg2	0.521014	0.324977
Btk	0.102174	0
Btla	0.0449275	0
Btn1a1	0.0217391	1
Btnl5	0.00869565	0
Btnl9	0.0615942	0.0789474
Btrc	0.102174	0.0967742
Bub1	0.0173913	0
Bub1b	0.0217391	0
Bub3	0.191304	0.556306
Bud13	0.0217391	0
Bud31	0.139855	0.496951
Bves	0.0217391	0
Bysl	0.102899	0.0528634
Bzrap1	0.00434783	1
Bzw1	0.518841	0.0887902
Bzw2	0.0826087	0.180328
C030018K13Rik	0.00724638	0
C030034I22Rik	0.00434783	0.230769
C030034L19Rik	0.0217391	0
C030039L03Rik	0.00724638	0
C030044B11Rik	0.00724638	0.130435
C030046E11Rik	0.0217391	0
C030046I01Rik	0.230435	0.260331
C130022K22Rik	0.026087	0.464286
C130026I21Rik	0.0695652	1
C130039O16Rik	0.0333333	0.0862069
C130050O18Rik	0.0144928	0.5
C130071C03Rik	0.00724638	0
C130074G19Rik	0.0144928	1
C130080G10Rik	0.00724638	0
C1d	0.193478	0.705882
C1galt1	0.105797	0
C1galt1c1	0.0369565	0.132159
C1qa	0.232609	0.849727
C1qb	0.308696	0.830149
C1qbp	0.221739	0.714015
C1qc	0.207246	0.84104
C1qtnf1	0.15942	0.0806452
C1qtnf2	0.105072	0.628571
C1qtnf3	0.076087	0
C1qtnf4	0.00724638	1
[truncated: 11,377 more rows]

## Sheet: Figure 2C
	Lars2	P4hb	Pdia3	Tm9sf2	Cd164	Rps29	Cdc42	Nptn	Eif4g2	Ubc	Tomm6	Drap1	Snrpc	Arhgdia	Ptms	Tmsb10	Aes	Jund	Rpl13a	Cfl1
Aorta.aortic endothelial cell	-0.016348	-0.0314373	-0.034434	-0.0280119	-0.0205743	-0.0143872	-0.0323546	-0.0107119	-0.011221	-0.00723259	0.00584407	0.00795667	0.00749146	0.0100994	0.0304649	0.0195338	0.0314906	0.0432935	0.0450057	0.0475089
BAT.B cell	-0.0254322	-0.00793188	0.0010148	-0.00156818	-0.000622145	-0.034685	-0.00108009	-0.000675297	-0.00182534	-0.0111199	0.00975316	0.00671752	0.00962433	0.0233352	0.00246601	0.0455314	0.0220304	0.0452995	0.0430485	0.0399537
BAT.endothelial cell	-0.0313815	-0.0130364	-0.0112707	-0.00110226	-0.0109971	-0.0253752	-0.010874	0.00708689	-0.00239045	-0.0083831	0.0101768	0.00673911	0.0089639	0.00759069	0.0109729	0.00860991	0.0205258	0.0279905	0.0170725	0.0483301
BAT.myeloid cell	0.0831932	-0.00333467	-0.0116348	0.00289162	0.00212289	-0.0211553	-0.0343257	-0.00961842	0.00331898	-0.0210594	-0.000716968	0.00668556	0.0071373	-0.00329671	0.00682	0.0229565	0.0173476	0.043235	0.0330878	0.0191655
Bladder.bladder cell	-0.0494734	-0.00753253	-0.00695169	-0.00736378	0.00453039	-0.0278674	-0.00639892	-0.0167829	-0.00900951	0.0126996	0.00884921	0.00935814	0.0114969	0.0161327	0.0194401	0.0330328	0.0329763	0.0337156	0.0308238	0.0474592
Bladder.bladder urothelial cell	-0.0548805	-0.0102068	-0.0108305	-0.0160735	-0.00159697	-0.0273956	-0.00981623	-0.00865661	-0.0117744	-0.0054956	0.0117807	0.0142264	0.0118197	0.0249079	0.0171082	0.00767324	0.029562	0.0321924	0.0362878	0.0433768
Brain_Myeloid.microglial cell	-0.0277687	-0.0248197	-0.0242164	-0.0319964	-0.0357863	-0.01251	-0.0155149	-0.0273466	-0.0128639	-0.0197931	0.007493	0.00619322	0.00775744	0.0227678	0.0211553	0.00688562	0.0139506	-0.00465435	0.0379635	0.0477247
Brain_Non-Myeloid.astrocyte	-0.0431399	-0.019061	-0.0245559	-0.0221226	-0.0196927	-0.014934	-0.0174369	-0.0132518	-0.0039963	-0.0136257	0.0110406	0.00924551	0.0057089	0.0110037	0.0169093	0.00120292	0.0194201	0.00717103	0.0184888	0.0401628
Brain_Non-Myeloid.brain pericyte	-0.0727471	-0.0463975	-0.0317331	-0.0481341	-0.0368049	-0.00325178	-0.0329298	-0.0190519	-0.015059	-0.0253879	0.0287637	0.0164795	0.016224	0.0113854	0.0313797	0.0101048	0.0270066	0.0250602	0.0440819	0.0548675
Brain_Non-Myeloid.endothelial cell	-0.0559524	-0.0320935	-0.0337592	-0.021993	-0.0207651	-0.0146851	-0.0332857	-0.00799496	-0.0075292	-0.0212046	0.0156383	0.0105953	0.014351	0.0122516	0.0235634	0.0274897	0.0268532	0.0259474	0.0376732	0.0477592
Brain_Non-Myeloid.neuron	-0.0484342	-0.0278217	-0.0291828	-0.0341052	-0.0175439	-0.0227389	-0.0386914	-0.0281023	-0.010737	-0.00692118	0.0114519	0.019603	0.0179791	-0.000812696	0.0188777	0.0158682	0.0169967	0.0106695	0.0146709	0.00349325
Brain_Non-Myeloid.oligodendrocyte	-0.060947	-0.0244189	-0.00820262	-0.0315452	-0.015031	-0.00705667	-0.023531	-0.0104221	-0.00945719	-0.00655691	0.0156969	0.0195814	0.0202509	0.0253226	0.0086006	0.00165678	0.0365532	0.0356176	0.0339845	0.0635294
Brain_Non-Myeloid.oligodendrocyte precursor cell	-0.0725416	-0.0253433	-0.0198596	-0.0528335	-0.0209994	-0.00626201	-0.0298505	-0.0281894	-0.0165007	-0.0110211	0.0113639	0.0219113	0.0271897	0.0135654	0.0170573	0.0122322	0.024706	0.0167265	0.025413	0.0586296
Diaphragm.mesenchymal stem cell	-0.00261825	-0.0329501	-0.0507889	-0.0152318	-0.0209594	-0.00792068	-0.0369535	-0.0246399	-0.00308605	-0.0289607	0.0187586	0.00408471	0.013771	-0.0099795	0.0156315	0.03674	0.010596	-0.00579873	0.0451991	0.0209812
Diaphragm.skeletal muscle satellite cell	-0.0112764	-0.0283014	-0.0443094	-0.0176575	-0.0134301	-0.0098769	-0.0396618	-0.0109936	-0.024608	-0.0529661	0.0218457	0.0113419	0.0144638	0.00129883	0.00279079	0.0337679	0.0105588	0.000906535	0.0535753	0.0310024
GAT.endothelial cell	-0.0702367	-0.0390486	-0.0111984	-0.0312871	-0.0312222	-0.0201636	-0.0119337	-0.0250259	-0.00759461	-0.0163779	0.011301	0.0141767	0.0159222	0.016061	0.0321488	0.0196069	0.0338929	0.0195215	0.0499625	0.0428303
GAT.mesenchymal stem cell of adipose	-0.0455057	-0.0364491	-0.0238903	-0.0225437	-0.0205025	-0.0305445	-0.00921843	-0.0168452	-0.00974812	-0.00917934	0.00960395	0.0174376	0.0121766	0.0230007	0.0277911	0.0339595	0.0335166	0.0453373	0.0345351	0.0392838
GAT.myeloid cell	-0.0590479	-0.0196951	-0.0122219	-0.0103206	-0.0110522	-0.0485964	-0.0115129	-0.0154366	-0.0143003	-0.0177054	0.00747189	0.00838428	0.0112181	0.0199386	0.0190535	0.0289778	0.0230568	0.0360962	0.0359956	0.0445397
Heart.atrial myocyte	-0.0579567	-0.0312953	-0.0278449	-0.0331059	-0.0203858	-0.0118324	-0.00722516	-0.0200444	-0.0277434	-0.0102119	0.00291711	0.00466515	0.00700141	0.0115939	0.0157067	0.00548496	0.0309502	0.0214638	0.00375761	0.0231609
Heart.endocardial cell	-0.0754997	-0.0266618	-0.0255775	-0.0342984	-0.0221855	-0.0200854	-0.0127927	-0.0164959	-0.016086	-0.0086377	0.00703647	0.00519778	0.00681989	0.01007	0.0112236	0.0210813	0.0187567	0.0184328	0.039148	0.0357378
Heart.endothelial cell of coronary artery	-0.0448548	-0.0244011	-0.0224564	-0.0280484	-0.0168091	-0.0249742	-0.0193846	-0.0215889	-0.0118058	-0.00950219	0.00428699	0.00567341	0.0086101	0.00901706	0.0135256	0.0108903	0.018925	0.0240247	0.0240562	0.0335253
Heart.fibroblast of cardiac tissue	-0.036198	-0.0240427	-0.0243398	-0.0248607	-0.0182505	-0.0214623	-0.0119276	-0.013924	-0.00779052	-0.000864524	0.007774	0.00968365	0.0100391	0.0137105	0.0227644	0.0227932	0.0258008	0.0247852	0.0260756	0.0355161
Heart.monocyte	-0.0542943	-0.0209095	-0.0265424	-0.0299123	-0.0246369	-0.0260705	-0.0180797	-0.0240119	-0.0131579	-0.00890764	0.00543829	0.006092	0.00777927	0.0131123	0.0112598	0.00975365	0.0146029	0.0178677	0.0237579	0.0359273
Heart.valve cell	-0.0612431	-0.0267374	-0.0325056	-0.0294618	-0.0220543	-0.012466	-0.0118961	-0.018985	-0.0060923	-0.00340731	0.00605098	0.00766502	0.0111947	0.0107013	0.0198133	0.010487	0.0172623	0.0232681	0.0213974	0.0414863
Kidney.fenestrated cell	-0.0243291	-0.0172273	-0.00964343	-0.0451546	-0.0261827	-0.0108343	-0.000458083	-0.0103991	-0.0190761	-0.0181025	0.00500827	0.00390854	0.00633116	0.0286292	0.0142644	0.0110838	0.0178414	0.0243273	0.0352618	0.0503961
Kidney.kidney collecting duct epithelial cell	-0.0130824	-0.0294653	-0.0128364	-0.0102442	-0.0164118	-0.0147903	-0.0130571	-0.00234124	-0.0101102	-0.00409019	0.0081266	0.00857341	0.00429841	0.0110803	0.0236975	0.000265905	0.0307125	0.0187104	0.0221679	0.0279528
Large_Intestine.enterocyte of epithelium of large intestine	-0.0717167	-0.00902555	-0.00234619	-0.011748	-0.0076725	-0.00851893	0.00540022	-0.0117474	-0.0106001	-0.021438	0.014401	0.0105958	0.0101984	0.0147295	0.0171142	0.0321573	0.0314314	0.0113701	0.0523953	0.0555345
Large_Intestine.epithelial cell of large intestine	-0.0947508	-0.000679785	-0.00421205	-0.00353428	0.000380758	-0.0246422	0.00495833	0.000583074	0.00247858	-0.00573946	0.00989681	0.0101478	0.00675783	0.0164303	0.0240269	0.0358664	0.0272178	0.0281579	0.0386889	0.02844
Large_Intestine.intestinal crypt stem cell	-0.077167	-0.0155342	-0.0149003	-0.0292313	-0.0173024	-0.0227845	-0.013079	-0.0115892	-0.0166403	-0.0171915	0.011918	0.0129655	0.0195248	0.0166929	0.0249723	0.024151	0.0314503	0.0216448	0.0438132	0.0464055
Large_Intestine.large intestine goblet cell	-0.0586798	-0.00242485	-0.00500843	-0.0141017	-0.0100014	-0.014102	-0.00142906	-0.00273713	-0.00868674	-0.0141409	0.0148447	0.0177228	0.0109985	0.015446	0.0149336	0.0498857	0.0316342	0.019904	0.0344552	0.0363371
Large_Intestine.secretory cell	-0.0773849	-0.00243047	-0.0100123	-0.00873007	-0.0105268	-0.0276548	-0.00402373	-0.00482524	-0.00883605	0.000518344	0.00269727	0.014368	0.0101363	0.0193395	0.0245197	0.0221006	0.0317991	0.0384561	0.0278959	0.0379775
Limb_Muscle.endothelial cell	-0.0436166	-0.0353215	-0.0284422	-0.023847	-0.0227843	-0.0142772	-0.0312997	-0.0222089	-0.0115576	-0.028663	0.0117193	0.00950869	0.0112415	0.0189353	0.0162038	0.0193882	0.0141369	0.0403918	0.0320311	0.0532853
Limb_Muscle.mesenchymal stem cell	-0.0431748	-0.0430588	-0.0399493	-0.0235747	-0.0309657	-0.0143496	-0.0253786	-0.0204595	-0.0133371	-0.0208797	0.0135344	0.0239115	0.0144495	0.0150373	0.0219494	0.0325827	0.026199	0.0379302	0.0448103	0.043729
Limb_Muscle.skeletal muscle satellite cell	-0.0502989	-0.0439456	-0.0391767	-0.0284298	-0.0198142	-0.0261251	-0.0262239	-0.0167003	-0.0279758	-0.0385924	0.0189915	0.0223416	0.0235081	0.0083723	0.0240527	0.026197	0.0180571	0.0507168	0.0486655	0.050212
Liver.endothelial cell of hepatic sinusoid	-0.0647025	-0.0182676	-0.0190921	-0.0099296	-0.018131	-0.00153405	-0.0140145	-0.0331735	-0.0067953	-0.0145021	0.00832057	0.00972322	0.0085091	0.0259421	0.00882928	0.0131132	0.0212808	-0.00139284	0.0309202	0.0346982
Liver.hepatocyte	-0.0239393	-0.0260117	0.00468918	-0.00568604	-0.0211009	-0.012117	-0.00882025	-0.000474736	-0.0120463	-0.00937208	-0.00648487	0.00299819	0.00401777	0.0105476	0.0191625	0.00166454	0.030597	0.0199869	-0.00115775	0.0176685
Lung.adventitial cell	-0.0646953	-0.0400884	-0.0268827	-0.0513923	-0.0309344	-0.00209408	-0.0149463	-0.0293773	-0.0233628	-0.0192338	0.012414	0.016913	0.0132139	0.0300749	0.0260653	0.0330843	0.0308141	0.0300642	0.0420903	0.0516067
Lung.bronchial smooth muscle cell	-0.0103731	-0.0222668	-0.0239153	-0.0221099	-0.0194597	-0.0194857	-0.0147555	-0.0102215	-0.0107253	-0.0180385	0.00687112	0.00380263	0.0103816	0.0122198	0.0106706	0.00898926	0.0249819	0.0220842	0.0247155	0.0364248
Lung.fibroblast of lung	-0.0117414	-0.020467	-0.0147396	-0.0128776	0.00224297	-0.00880763	-0.00393133	-0.0185571	-0.00893337	-0.0247858	0.00942906	0.01177	0.00444478	0.0238679	0.0264242	0.0429261	0.0238788	0.0271577	0.0238413	0.043537
MAT.B cell	-0.0749552	-0.0126644	0.00712002	-0.029383	-0.0191547	-0.0270461	-0.00223838	-0.00448429	0.00331197	-0.00258317	0.011399	0.0124907	0.0100702	0.032553	0.00432377	0.0479377	0.033915	0.0534947	0.0412602	0.0616203
MAT.endothelial cell	-0.0367345	-0.0326837	-0.026045	-0.0279879	-0.0249625	-0.00687158	-0.0141945	-0.0148872	-0.0101119	-0.0179366	0.0113629	0.00853641	0.00681352	0.0233472	0.0289603	0.0267539	0.0321256	0.0304191	0.0289651	0.043786
MAT.macrophage	-0.0451592	0.00637261	-0.00264181	-0.00462138	-0.00261511	-0.031715	0.00143107	-0.00896852	-0.0129338	-0.00462981	0.0165189	0.0131902	0.011756	0.0482031	0.0343084	0.0582343	0.0351639	0.0414505	0.0395929	0.0639368
MAT.mesenchymal stem cell of adipose	-0.067119	-0.0341076	-0.0234675	-0.0238933	-0.0251117	-0.0203169	-0.000580706	-0.0121362	-0.00222102	-0.00398867	0.011218	0.0175855	0.0117544	0.0351401	0.0297582	0.0372325	0.0422842	0.05294	0.0408065	0.051112
Mammary_Gland.basal cell	-0.0127669	-0.0201044	-0.0190231	-0.000930622	-0.00165681	-0.0499126	-0.0243454	0.011041	0.0145325	0.0168157	0.0070037	0.0127317	0.0223687	0.0114646	0.0439115	0.0148441	0.0325067	0.116412	0.0150808	0.0403068
Mammary_Gland.luminal epithelial cell of mammary gland	-0.00633044	-0.00783261	0.0115167	-0.00685776	-0.0239128	-0.0499702	-0.0213817	0.00841719	0.00232565	0.0162214	0.00776629	0.00810152	0.015024	0.0159125	0.0276461	0.00819729	0.0463088	0.121621	0.0140202	0.0325013
Marrow.NK cell	-0.0338063	-0.0310017	-0.0244665	-0.0187995	-0.0230238	-0.00669705	-0.0346312	-0.0241531	-0.00910663	-0.0105918	0.0161427	0.0169207	0.0225408	0.00305625	0.0111767	0.0610487	0.0299754	0.03122	0.0494254	0.0476298
Marrow.granulocyte	-0.0357323	-0.0127165	-0.0134088	-0.00656422	-0.0252793	-0.0100824	-0.0188069	-0.0110797	-0.00938705	-0.00471609	0.00617648	0.00275149	0.00685817	0.00192365	0.00497874	0.00878769	0.0142562	0.0253687	0.0143801	0.047643
Marrow.granulocytopoietic cell	-0.0373161	-0.0297628	-0.0263238	-0.021038	-0.0180722	-0.0112151	-0.0257768	-0.0101456	-0.0125284	-0.00835397	0.00843402	0.00606097	0.0188738	0.00451598	0.00180706	0.0111439	0.0201666	0.0118845	0.0265674	0.0393503
Marrow.hematopoietic stem cell	-0.0686401	-0.0195884	-0.0181819	-0.0236627	-0.019144	-0.0255737	-0.0195798	-0.00461907	-0.0185688	-0.00230117	0.00908744	0.0126456	0.019893	0.020367	0.0051158	0.0168781	0.0226864	0.0267218	0.0354366	0.0518999
Marrow.immature B cell	-0.0338662	-0.00880835	-0.00784933	0.000520751	-0.00878964	-0.0186649	-0.0089823	-0.00510994	-0.0199531	-0.0111822	0.0137361	0.00668158	0.0208748	0.0212103	0.00052107	0.0572185	0.0267597	0.0324283	0.0289722	0.0596046
Marrow.late pro-B cell	-0.0236027	-0.0084969	-0.00232422	-0.00654699	-0.00282445	-0.00966078	-0.0117763	-0.00669559	-0.0198559	-0.00866423	0.0190511	0.0152712	0.0337864	0.00932791	0.000923662	0.0632416	0.0192969	0.0211786	0.0415944	0.0479129
Marrow.macrophage	-0.0234088	-0.00775654	-0.00575145	-0.00672123	-0.0240194	-0.0160359	-0.0121959	-0.0335042	-0.00910377	-0.0160119	0.0112511	0.0103776	0.0142602	0.0330358	0.0220598	0.044175	0.0289209	0.00725901	0.038558	0.0491659
Marrow.naive B cell	-0.0372525	-0.0114048	-6.64636e-05	-0.0164286	-0.014919	-0.0352501	-0.0189757	-0.013541	-0.0230339	-0.0124517	0.0062604	0.00551308	0.00857573	0.0171674	0.00365423	0.0307923	0.0226269	0.0226753	0.0329566	0.0486321
Marrow.precursor B cell	0.0205411	-0.0081725	-0.0162537	-0.000675718	-0.00529925	-0.00990607	-0.0157748	-0.00178998	-0.0126693	-0.0110691	0.0148763	0.0108123	0.0258066	0.0215851	0.000102407	0.0592846	0.0224675	0.0244079	0.0376424	0.0374611
Marrow.promonocyte	-0.0347417	-0.0335496	-0.0217174	-0.0164557	-0.0136544	-0.0234335	-0.020339	-0.0182825	-0.0171391	-0.00661775	0.0097732	0.00982238	0.0181528	0.0177476	0.0130751	0.0274911	0.0190123	0.0185044	0.0350546	0.0392411
Pancreas.pancreatic A cell	-0.0490923	-0.0318212	-0.0204098	-0.0198335	-0.0252518	-0.0118293	-0.0101882	-0.0121189	-0.0106368	0.00841274	0.00948741	0.0121055	0.00879661	0.014836	0.0170835	0.00620772	0.0361454	0.0529928	0.03238	0.0371119
Pancreas.pancreatic B cell	-0.0537386	-0.052765	-0.0332272	-0.0302866	-0.040936	-0.00492392	-0.0145057	-0.015579	-0.0134149	0.0127972	0.00684674	0.00915682	0.00513764	0.00876906	0.0112376	0.00130821	0.0285211	0.0506611	0.0116738	0.0273974
Pancreas.pancreatic acinar cell	-0.090373	-0.0175523	-0.00242431	-0.00371582	-0.00272223	-0.003731	-0.00367507	0.00238363	-0.00230786	-0.0101651	0.00317449	0.000935843	0.000310394	0.00128659	0.00462458	0.00037568	0.00962679	0.0249377	0.00495796	0.00268391
Pancreas.pancreatic ductal cell	-0.098228	-0.0402547	-0.0244911	-0.0285775	-0.0402286	-0.0093399	-0.0110002	-0.00878597	-0.014734	-0.0108407	0.015095	0.0152671	0.0148123	0.0140704	0.0274938	0.0246189	0.0395634	0.0413787	0.0322929	0.0434686
SCAT.B cell	-0.0401442	-0.00613903	0.00650725	-0.0127988	-0.0102235	-0.0302286	-0.0234148	-0.00810631	-0.0051903	-0.00297354	0.00641491	0.00492878	0.0056635	0.0216688	0.00366068	0.0244991	0.0254357	0.062611	0.0259288	0.0375378
SCAT.endothelial cell	-0.0512247	-0.0216986	-0.0206892	-0.0120942	-0.0112564	-0.0258899	-0.0213527	-0.011749	-0.0114794	-0.0213679	0.00896338	0.00509084	0.0128159	0.00457149	0.0140039	0.0127683	0.0221846	0.0371104	0.0173101	0.0301797
SCAT.mesenchymal stem cell of adipose	-0.0445244	-0.0435229	-0.0314814	-0.0236725	-0.0348062	-0.0257884	-0.0162145	-0.00736847	-0.00814122	-0.00144234	0.00797669	0.00929698	0.0108641	0.0162789	0.0216137	0.0212967	0.0299525	0.0681993	0.0252293	0.021811
SCAT.myeloid cell	-0.0254397	-0.0218608	-0.0334743	-0.0132909	-0.0196173	-0.0419278	-0.0150644	-0.0109561	-0.00821407	-0.0177597	0.00677494	0.00573444	0.00968901	0.0183026	0.0132574	0.0287912	0.0235211	0.0382623	0.0203709	0.0380666
Skin.basal cell of epidermis	-0.0440308	-0.0278988	-0.0366949	-0.0185437	-0.0218682	-0.0063502	-0.0213668	-0.0174876	-0.0124387	-0.0226771	0.0157642	0.0181801	0.0193217	0.0138377	0.0307837	0.0106648	0.0242126	0.0462362	0.0599383	0.0420281
Skin.bulge keratinocyte	-0.0449108	-0.0282368	-0.0328903	-0.0229689	-0.0203856	-0.00407844	-0.0271891	-0.0189042	-0.0106355	-0.0253527	0.019478	0.0153748	0.0210455	0.00792735	0.042457	0.0214538	0.0223014	0.039407	0.0630025	0.0387684
Skin.epidermal cell	-0.0431709	-0.0283087	-0.0384787	-0.0177244	-0.0155613	-0.0251251	-0.0252014	-0.0191013	-0.013234	-0.01602	0.00614637	0.0159636	0.0126774	0.0190792	0.0277874	0.00446464	0.0302383	0.0526301	0.0475247	0.0341174
Spleen.B cell	-0.0351315	-0.00655674	-0.00318105	-0.015172	-0.0175497	-0.0306495	-0.00797629	-0.00731271	-0.014115	-0.0124124	0.00931682	0.00857362	0.0107915	0.0260906	0.00203645	0.0440586	0.0256232	0.0500517	0.0539496	0.0531632
Spleen.CD4-positive, alpha-beta T cell	-0.0360073	-0.0160131	-0.0106727	-0.0201135	-0.0201199	-0.0457354	-0.00622231	-0.00542344	-0.0149299	-0.0120897	0.0109001	0.0116892	0.010234	0.0272931	0.00909946	0.0425601	0.0408333	0.0488076	0.0358287	0.0480183
Spleen.CD8-positive, alpha-beta T cell	-0.0329714	-0.010431	0.000353637	-0.012702	-0.0216922	-0.0417338	-0.0118413	0.00119514	-0.0191625	-0.00303281	0.0142164	0.013748	0.0116052	0.0369441	0.00406688	0.0441735	0.0416677	0.0559484	0.0540054	0.0508247
Thymus.DN4 thymocyte	-0.029565	-0.0200825	-0.013882	-0.0163995	-0.0182604	-0.0471516	-0.00699878	-0.00478272	-0.0189321	-0.0163379	0.00478642	0.00697835	0.0125665	0.0196464	0.00566653	0.0261204	0.0358037	0.0254426	0.0484287	0.0311228
Thymus.thymocyte	-0.0552448	-0.0205075	-0.0233331	-0.0243455	-0.0729486	-0.0193655	-0.0126978	-0.00949286	-0.0234178	-0.023118	0.0081249	0.00568194	0.0104833	0.00673927	0.0108859	0.013741	0.0128958	0.00524477	0.0525823	0.0615263
Tongue.basal cell of epidermis	-0.00666242	-0.0318473	-0.0346775	-0.0264008	-0.0233511	-0.0264253	-0.0203659	-0.0198283	-0.0277636	-0.00912097	0.010273	0.0145901	0.0169824	0.0143283	0.0410539	0.0131514	0.032874	0.0327295	0.0584124	0.0361046
Tongue.keratinocyte	-0.00397929	-0.0333203	-0.0334574	-0.0228117	-0.0287145	-0.0286195	-0.0228584	-0.0185547	-0.0251419	-0.0075387	0.00609992	0.0111153	0.0121865	0.0125211	0.0294357	0.00683899	0.0307416	0.0229977	0.0612241	0.027507
Trachea.endothelial cell	-0.0277666	-0.0197572	-0.0210127	-0.0345964	-0.0173326	-0.0191291	-0.0326989	-0.0400077	-0.0240466	-0.0280031	0.000583217	0.00845371	0.012422	0.0102526	0.022835	0.0164096	0.021392	-0.00338157	0.0317513	0.033384
Trachea.fibroblast	-0.0345038	-0.034911	-0.0240328	-0.0337325	-0.0312916	-0.0185184	-0.0254464	-0.0287434	-0.0117848	-0.0167489	0.00736964	0.0131036	0.0129674	0.0145991	0.0212439	0.0203635	0.0255954	0.0161573	0.0371558	0.0324471
Trachea.macrophage	-0.0377048	-0.019633	-0.0147896	-0.0160367	-0.0173406	-0.0342912	-0.0239829	-0.0241653	-0.0059183	-0.0181577	0.00286818	0.0097635	0.0109387	0.0174125	0.0168548	0.0196657	0.0224684	0.0208679	0.03411	0.0440291
