# Supplementary material for: Mouse aging cell atlas analysis reveals global and cell type-specific aging signatures
Source: eLife journal article supplement (doi:10.7554/elife.62293), 2021-04-12
Supplement: supp [file elife-62293-supp-v1.zip › elife_poa_e62293_Figure_3_source_data_1.xlsx]

## Sheet: Figure 3A
	reg.mean	reg.se	reg.p	loc	cell category
Pancreas.pancreatic acinar cell	-9.19787	0.175029	0	0	parenchymal
Pancreas.pancreatic B cell	-8.15675	0.101904	0	1	parenchymal
Brain_Non-Myeloid.neuron	-7.74144	0.196772	0	2	parenchymal
Large_Intestine.secretory cell	-6.49286	0.138171	1.67581e-291	3	parenchymal;epithelial
Brain_Non-Myeloid.oligodendrocyte precursor cell	-5.12952	0.2015	2.53195e-104	4	stem cell/progenitor
Heart.valve cell	-4.84126	0.224765	4.2166e-94	5	parenchymal
Brain_Non-Myeloid.oligodendrocyte	-4.62752	0.0855059	0	6	parenchymal
Brain_Non-Myeloid.astrocyte	-4.52887	0.141525	1.11444e-149	7	parenchymal
Liver.hepatocyte	-4.40865	0.127887	6.30828e-266	8	parenchymal
Kidney.kidney collecting duct epithelial cell	-4.38698	0.145749	1.00144e-107	9	parenchymal;epithelial
Brain_Myeloid.microglial cell	-4.25066	0.0502381	0	10	immune
Liver.endothelial cell of hepatic sinusoid	-3.04948	0.139672	5.17777e-72	11	endothelial
Heart.atrial myocyte	-2.86948	0.201539	4.28641e-43	12	parenchymal;muscle cell
Thymus.thymocyte	-2.71296	0.111383	9.92898e-138	13	immune
Heart.endothelial cell of coronary artery	-2.70068	0.0815318	8.3449e-210	14	endothelial
Trachea.endothelial cell	-2.63456	0.247822	8.25544e-23	15	endothelial
Pancreas.pancreatic A cell	-2.50416	0.12909	5.08376e-42	16	parenchymal
Kidney.fenestrated cell	-2.35162	0.193017	2.32796e-20	17	endothelial
Large_Intestine.large intestine goblet cell	-2.17901	0.111748	7.73474e-88	18	parenchymal;epithelial
Aorta.aortic endothelial cell	-2.11657	0.173734	1.10599e-27	19	endothelial
Pancreas.pancreatic ductal cell	-1.98892	0.284456	3.2907e-17	20	parenchymal
Tongue.keratinocyte	-1.96042	0.113639	1.17217e-55	21	parenchymal
Large_Intestine.intestinal crypt stem cell	-1.92315	0.1084	1.6627e-68	22	stem cell/progenitor
Lung.fibroblast of lung	-1.65028	0.192019	5.59283e-18	23	stromal
Large_Intestine.enterocyte of epithelium of large intestine	-1.60904	0.089852	2.22432e-72	24	parenchymal;epithelial
Marrow.late pro-B cell	-1.4213	0.1695	6.06181e-12	25	immune
Marrow.precursor B cell	-1.38432	0.144276	1.84558e-21	26	immune
SCAT.endothelial cell	-1.30145	0.192789	7.15348e-12	27	endothelial
Heart.endocardial cell	-1.29042	0.189807	2.25279e-09	28	parenchymal
Brain_Non-Myeloid.brain pericyte	-1.23527	0.246267	9.47317e-11	29	stromal
Mammary_Gland.luminal epithelial cell of mammary gland	-1.20145	0.171733	3.96286e-12	30	parenchymal;epithelial
Bladder.bladder urothelial cell	-1.07021	0.124798	1.5899e-20	31	epithelial
Tongue.basal cell of epidermis	-0.938398	0.0865256	8.4103e-26	32	parenchymal
MAT.endothelial cell	-0.892244	0.262043	0.000648044	33	endothelial
BAT.myeloid cell	-0.816605	0.215965	1.11148e-07	34	immune
GAT.endothelial cell	-0.715945	0.20478	0.0015452	35	endothelial
Skin.epidermal cell	-0.687786	0.172222	0.000279572	36	epithelial
Brain_Non-Myeloid.endothelial cell	-0.671262	0.100549	1.24297e-12	37	endothelial
Large_Intestine.epithelial cell of large intestine	-0.654276	0.0861085	7.31561e-10	38	parenchymal;epithelial
BAT.endothelial cell	-0.628186	0.201288	0.00228839	39	endothelial
Mammary_Gland.basal cell	-0.503393	0.107139	5.19458e-06	40	parenchymal
Lung.bronchial smooth muscle cell	-0.494821	0.122357	3.03897e-07	41	parenchymal;muscle cell
Trachea.fibroblast	-0.265978	0.128774	0.0300935	42	stromal
Thymus.DN4 thymocyte	-0.235369	0.106031	0.0246788	43	immune
Lung.adventitial cell	-0.177462	0.262111	0.469223	44	stromal
Marrow.macrophage	0.264071	0.172331	0.187609	45	immune
Marrow.granulocyte	0.266098	0.0648669	0.00168126	46	immune
SCAT.mesenchymal stem cell of adipose	0.37364	0.117181	0.000689408	47	stem cell/progenitor
Spleen.CD4-positive, alpha-beta T cell	0.410731	0.147036	0.0458918	48	immune
Marrow.immature B cell	0.440668	0.141932	0.0112215	49	immune
Bladder.bladder cell	0.513543	0.141954	0.000139122	50	parenchymal
Limb_Muscle.endothelial cell	0.712212	0.216939	0.000299116	51	endothelial
Spleen.CD8-positive, alpha-beta T cell	0.747883	0.162782	0.000753801	52	immune
Skin.bulge keratinocyte	0.945379	0.0899802	1.35258e-26	53	parenchymal
Heart.fibroblast of cardiac tissue	0.995344	0.0735167	2.84256e-38	54	stromal
Marrow.granulocytopoietic cell	1.02401	0.180779	8.3171e-08	55	immune;stem cell/progenitor
MAT.mesenchymal stem cell of adipose	1.09495	0.114547	3.94788e-21	56	stem cell/progenitor
SCAT.B cell	1.18721	0.228356	3.16004e-07	57	immune
Marrow.NK cell	1.66788	0.198643	5.32784e-18	58	immune
GAT.mesenchymal stem cell of adipose	1.89176	0.12086	8.02636e-66	59	stem cell/progenitor
Marrow.hematopoietic stem cell	2.00294	0.0831792	3.52288e-137	60	immune;stem cell/progenitor
Skin.basal cell of epidermis	2.37311	0.115687	1.08062e-108	61	parenchymal
MAT.B cell	2.55743	0.184187	5.66915e-32	62	immune
Limb_Muscle.skeletal muscle satellite cell	2.71502	0.118944	3.85922e-153	63	stem cell/progenitor
Heart.monocyte	3.08943	0.131736	3.16133e-144	64	immune
Spleen.B cell	3.12998	0.0668741	1.79036e-293	65	immune
SCAT.myeloid cell	3.13397	0.151437	5.8732e-103	66	immune
Limb_Muscle.mesenchymal stem cell	3.61844	0.162817	8.48106e-148	67	stem cell/progenitor
Marrow.promonocyte	3.66772	0.130505	9.64015e-164	68	immune
Trachea.macrophage	3.93033	0.21639	3.33379e-84	69	immune
Diaphragm.skeletal muscle satellite cell	4.04607	0.154732	2.43636e-176	70	stem cell/progenitor;muscle cell
GAT.myeloid cell	4.30134	0.137721	1.85752e-162	71	immune
Marrow.naive B cell	4.33075	0.0828287	0	72	immune
MAT.macrophage	4.51316	0.219003	2.64238e-60	73	immune
BAT.B cell	4.59624	0.156455	3.6581e-139	74	immune
Diaphragm.mesenchymal stem cell	4.63774	0.190469	9.36956e-133	75	stem cell/progenitor

## Sheet: Figure 3B
	mean	se	loc
parenchymal	-2.86314	0.586347	0
endothelial	-1.49067	0.356969	1
epithelial	-0.897413	0.190321	2
stromal	-0.458533	0.541726	3
stem cell/progenitor	1.25881	0.862174	4
immune	1.37698	0.62463	5

## Sheet: Figure 3C
	facs	droplet
analyte_Bladder.bladder cell	0.513543	1.68542
analyte_Bladder.bladder urothelial cell	-1.07021	-1.29383
analyte_Kidney.B cell	0.545224	2.25849
analyte_Kidney.T cell	-1.10266	0.8751
analyte_Kidney.epithelial cell of proximal tubule	-5.20882	-4.57497
analyte_Kidney.fenestrated cell	-2.35162	-0.48363
analyte_Kidney.kidney collecting duct epithelial cell	-4.38698	-7.93682
analyte_Kidney.kidney collecting duct principal cell	-5.76629	-6.60939
analyte_Kidney.kidney loop of Henle ascending limb epithelial cell	-5.68822	-7.06043
analyte_Kidney.macrophage	3.69344	3.85359
analyte_Large_Intestine.enterocyte of epithelium of large intestine	-1.60904	-3.45031
analyte_Large_Intestine.epithelial cell of large intestine	-0.654276	-4.45278
analyte_Large_Intestine.intestinal crypt stem cell	-1.92315	-2.91359
analyte_Large_Intestine.large intestine goblet cell	-2.17901	-5.23438
analyte_Limb_Muscle.B cell	5.90782	2.22378
analyte_Limb_Muscle.T cell	2.68449	0.12811
analyte_Limb_Muscle.endothelial cell	0.712212	-0.861529
analyte_Limb_Muscle.macrophage	4.61572	2.98357
analyte_Limb_Muscle.mesenchymal stem cell	3.61844	1.54487
analyte_Limb_Muscle.skeletal muscle satellite cell	2.71502	-0.665471
analyte_Liver.B cell	3.26277	1.45166
analyte_Liver.Kupffer cell	1.21693	3.2533
analyte_Liver.NK cell	0.0732875	1.05495
analyte_Liver.endothelial cell of hepatic sinusoid	-3.04948	-1.72438
analyte_Liver.hepatocyte	-4.40865	-6.32432
analyte_Liver.myeloid leukocyte	3.97747	4.57673
analyte_Lung.B cell	5.17742	1.93755
analyte_Lung.CD4-positive, alpha-beta T cell	0.590615	0.478871
analyte_Lung.CD8-positive, alpha-beta T cell	2.60357	0.484349
analyte_Lung.NK cell	0.701814	0.52121
analyte_Lung.T cell	2.49934	0.303709
analyte_Lung.adventitial cell	-0.177462	0.950801
analyte_Lung.bronchial smooth muscle cell	-0.494821	-0.30892
analyte_Lung.ciliated columnar cell of tracheobronchial tree	-4.02181	-1.76621
analyte_Lung.classical monocyte	5.16003	2.26816
analyte_Lung.club cell of bronchiole	0.233396	1.64026
analyte_Lung.dendritic cell	3.85037	4.26301
analyte_Lung.endothelial cell of lymphatic vessel	-3.18367	-0.826609
analyte_Lung.fibroblast of lung	-1.65028	0.0665609
analyte_Lung.intermediate monocyte	3.28071	2.56076
analyte_Lung.lung macrophage	6.64028	2.78678
analyte_Lung.lung neuroendocrine cell	-0.705873	0.324118
analyte_Lung.mature NK T cell	-3.58274	0.170697
analyte_Lung.myeloid dendritic cell	5.23946	4.34584
analyte_Lung.neutrophil	-0.862773	0.351651
analyte_Lung.non-classical monocyte	3.1608	2.85928
analyte_Lung.pericyte cell	-6.27628	-1.89042
analyte_Lung.plasma cell	0.859827	0.347322
analyte_Lung.plasmacytoid dendritic cell	3.06597	1.79102
analyte_Lung.pulmonary interstitial fibroblast	-0.934073	0.679167
analyte_Lung.regulatory T cell	2.22121	0.133034
analyte_Lung.smooth muscle cell of the pulmonary artery	0.410142	-0.34911
analyte_Lung.type II pneumocyte	1.63601	0.422198
analyte_Lung.vein endothelial cell	0.998937	0.205137
analyte_Mammary_Gland.basal cell	-0.503393	0.855341
analyte_Mammary_Gland.endothelial cell	-2.26739	-0.541284
analyte_Mammary_Gland.luminal epithelial cell of mammary gland	-1.20145	0.253652
analyte_Mammary_Gland.stromal cell	-0.259178	1.44185
analyte_Marrow.NK cell	1.66788	1.83352
analyte_Marrow.basophil	2.14524	1.50507
analyte_Marrow.granulocyte	0.266098	-0.250014
analyte_Marrow.granulocytopoietic cell	1.02401	-0.563108
analyte_Marrow.immature B cell	0.440668	-0.0187906
analyte_Marrow.late pro-B cell	-1.4213	1.01831
analyte_Marrow.macrophage	0.264071	-0.076987
analyte_Marrow.megakaryocyte-erythroid progenitor cell	0.0470803	1.15272
analyte_Marrow.naive B cell	4.33075	1.1866
analyte_Marrow.precursor B cell	-1.38432	1.08385
analyte_Marrow.promonocyte	3.66772	1.19777
analyte_Pancreas.endothelial cell	-2.33091	-2.0897
analyte_Pancreas.leukocyte	4.71078	2.21233
analyte_Pancreas.pancreatic A cell	-2.50416	-4.69592
analyte_Pancreas.pancreatic B cell	-8.15675	-7.72232
analyte_Pancreas.pancreatic D cell	-4.01021	-3.36945
analyte_Pancreas.pancreatic PP cell	-4.82883	-1.15039
analyte_Pancreas.pancreatic acinar cell	-9.19787	-4.08746
analyte_Pancreas.pancreatic stellate cell	-0.538149	1.415
analyte_Skin.T cell	1.98591	1.19446
analyte_Skin.basal cell of epidermis	2.37311	2.48653
analyte_Skin.epidermal cell	-0.687786	0.548822
analyte_Skin.keratinocyte stem cell	-0.685507	1.8698
analyte_Spleen.B cell	3.12998	1.63707
analyte_Spleen.NK cell	0.561941	0.808424
analyte_Spleen.granulocyte	0.49687	0.804764
analyte_Spleen.proerythroblast	1.31253	1.81552
analyte_Thymus.DN4 thymocyte	-0.235369	0.161515
analyte_Thymus.thymocyte	-2.71296	-2.90515
analyte_Tongue.basal cell of epidermis	-0.938398	0.535972
analyte_Tongue.keratinocyte	-1.96042	-1.09042
analyte_Trachea.basal epithelial cell of tracheobronchial tree	-3.4655	-0.706922
analyte_Trachea.chondrocyte	-2.95603	-0.729255
analyte_Trachea.endothelial cell	-2.63456	-1.30426
analyte_Trachea.fibroblast	-0.265978	-0.0247905
analyte_Trachea.granulocyte	-3.14465	4.00422
analyte_Trachea.macrophage	3.93033	3.8975
analyte_Trachea.smooth muscle cell of trachea	-2.65354	-1.36249

## Sheet: Figure 3D
	reg.mean	reg.se	reg.p	cell category	binary_lifespan	turnover_mouse
Aorta.aortic endothelial cell	-2.11657	0.173734	1.10599e-27	endothelial	long	180d
Bladder.bladder cell	0.513543	0.141954	0.000139122	parenchymal	long
Bladder.bladder urothelial cell	-1.07021	0.124798	1.5899e-20	epithelial	long
Brain_Myeloid.microglial cell	-4.25066	0.0502381	0	immune	long
Brain_Non-Myeloid.endothelial cell	-0.671262	0.100549	1.24297e-12	endothelial	long
Brain_Non-Myeloid.neuron	-7.74144	0.196772	0	parenchymal	long	3y
Brain_Non-Myeloid.oligodendrocyte	-4.62752	0.0855059	0	parenchymal	long
Heart.atrial myocyte	-2.86948	0.201539	4.28641e-43	parenchymal;muscle cell	long
Heart.endocardial cell	-1.29042	0.189807	2.25279e-09	parenchymal	long
Heart.endothelial cell of coronary artery	-2.70068	0.0815318	8.3449e-210	endothelial	long	180d
Heart.fibroblast of cardiac tissue	0.995344	0.0735167	2.84256e-38	stromal	long
Heart.monocyte	3.08943	0.131736	3.16133e-144	immune	short	1d
Large_Intestine.enterocyte of epithelium of large intestine	-1.60904	0.089852	2.22432e-72	parenchymal;epithelial	short	3d
Limb_Muscle.endothelial cell	0.712212	0.216939	0.000299116	endothelial	long	2y
Liver.hepatocyte	-4.40865	0.127887	6.30828e-266	parenchymal	long	300d
Lung.fibroblast of lung	-1.65028	0.192019	5.59283e-18	stromal	long
Marrow.NK cell	1.66788	0.198643	5.32784e-18	immune	short
Marrow.granulocyte	0.266098	0.0648669	0.00168126	immune	short	4d
Marrow.hematopoietic stem cell	2.00294	0.0831792	3.52288e-137	immune;stem cell/progenitor	short	57d
Pancreas.pancreatic A cell	-2.50416	0.12909	5.08376e-42	parenchymal	long
Pancreas.pancreatic B cell	-8.15675	0.101904	0	parenchymal	long	1400d
Pancreas.pancreatic ductal cell	-1.98892	0.284456	3.2907e-17	parenchymal	long
Skin.basal cell of epidermis	2.37311	0.115687	1.08062e-108	parenchymal	long
Skin.epidermal cell	-0.687786	0.172222	0.000279572	epithelial	short	9d
Spleen.B cell	3.12998	0.0668741	1.79036e-293	immune	short	50d
Spleen.CD4-positive, alpha-beta T cell	0.410731	0.147036	0.0458918	immune	short	15d
Spleen.CD8-positive, alpha-beta T cell	0.747883	0.162782	0.000753801	immune	short	20d
Thymus.thymocyte	-2.71296	0.111383	9.92898e-138	immune	short	6d
