# Supplementary material for: Mouse aging cell atlas analysis reveals global and cell type-specific aging signatures
Source: eLife journal article supplement (doi:10.7554/elife.62293), 2021-04-12

A

C2cd4b: functional-category-specific  
parenchymal  
Specific age-coef: 6.48e-03 (se=8.04e-04)  
Background age-coef: 2.49e-06 (se=2.26e-06)

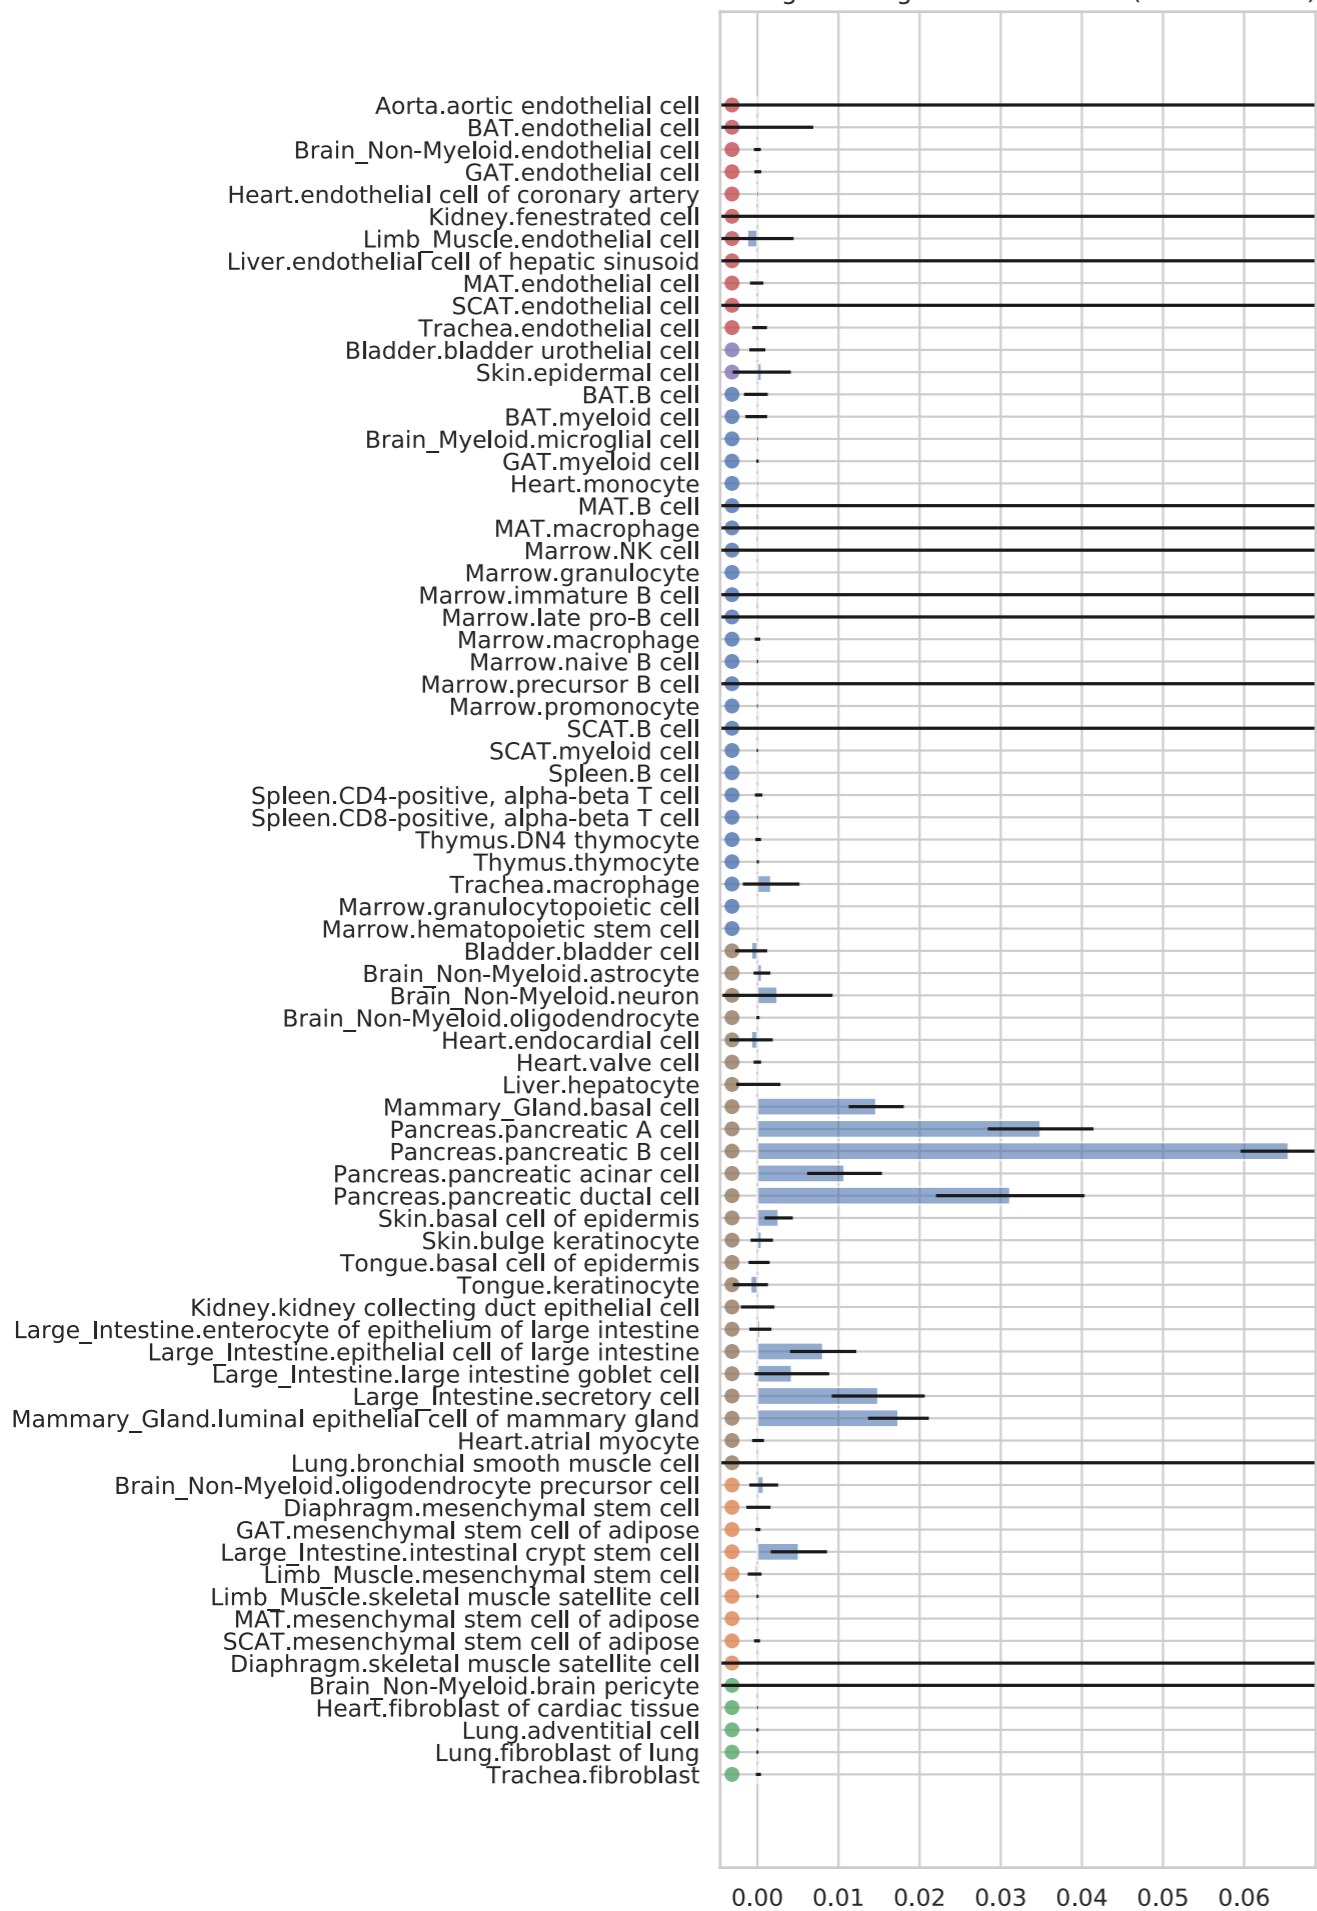

B

Gsn: functional-category-specific  
stromal  
Specific age-coef: -5.05e-02 (se=6.01e-03)  
Background age-coef: -7.02e-04 (se=3.02e-03)

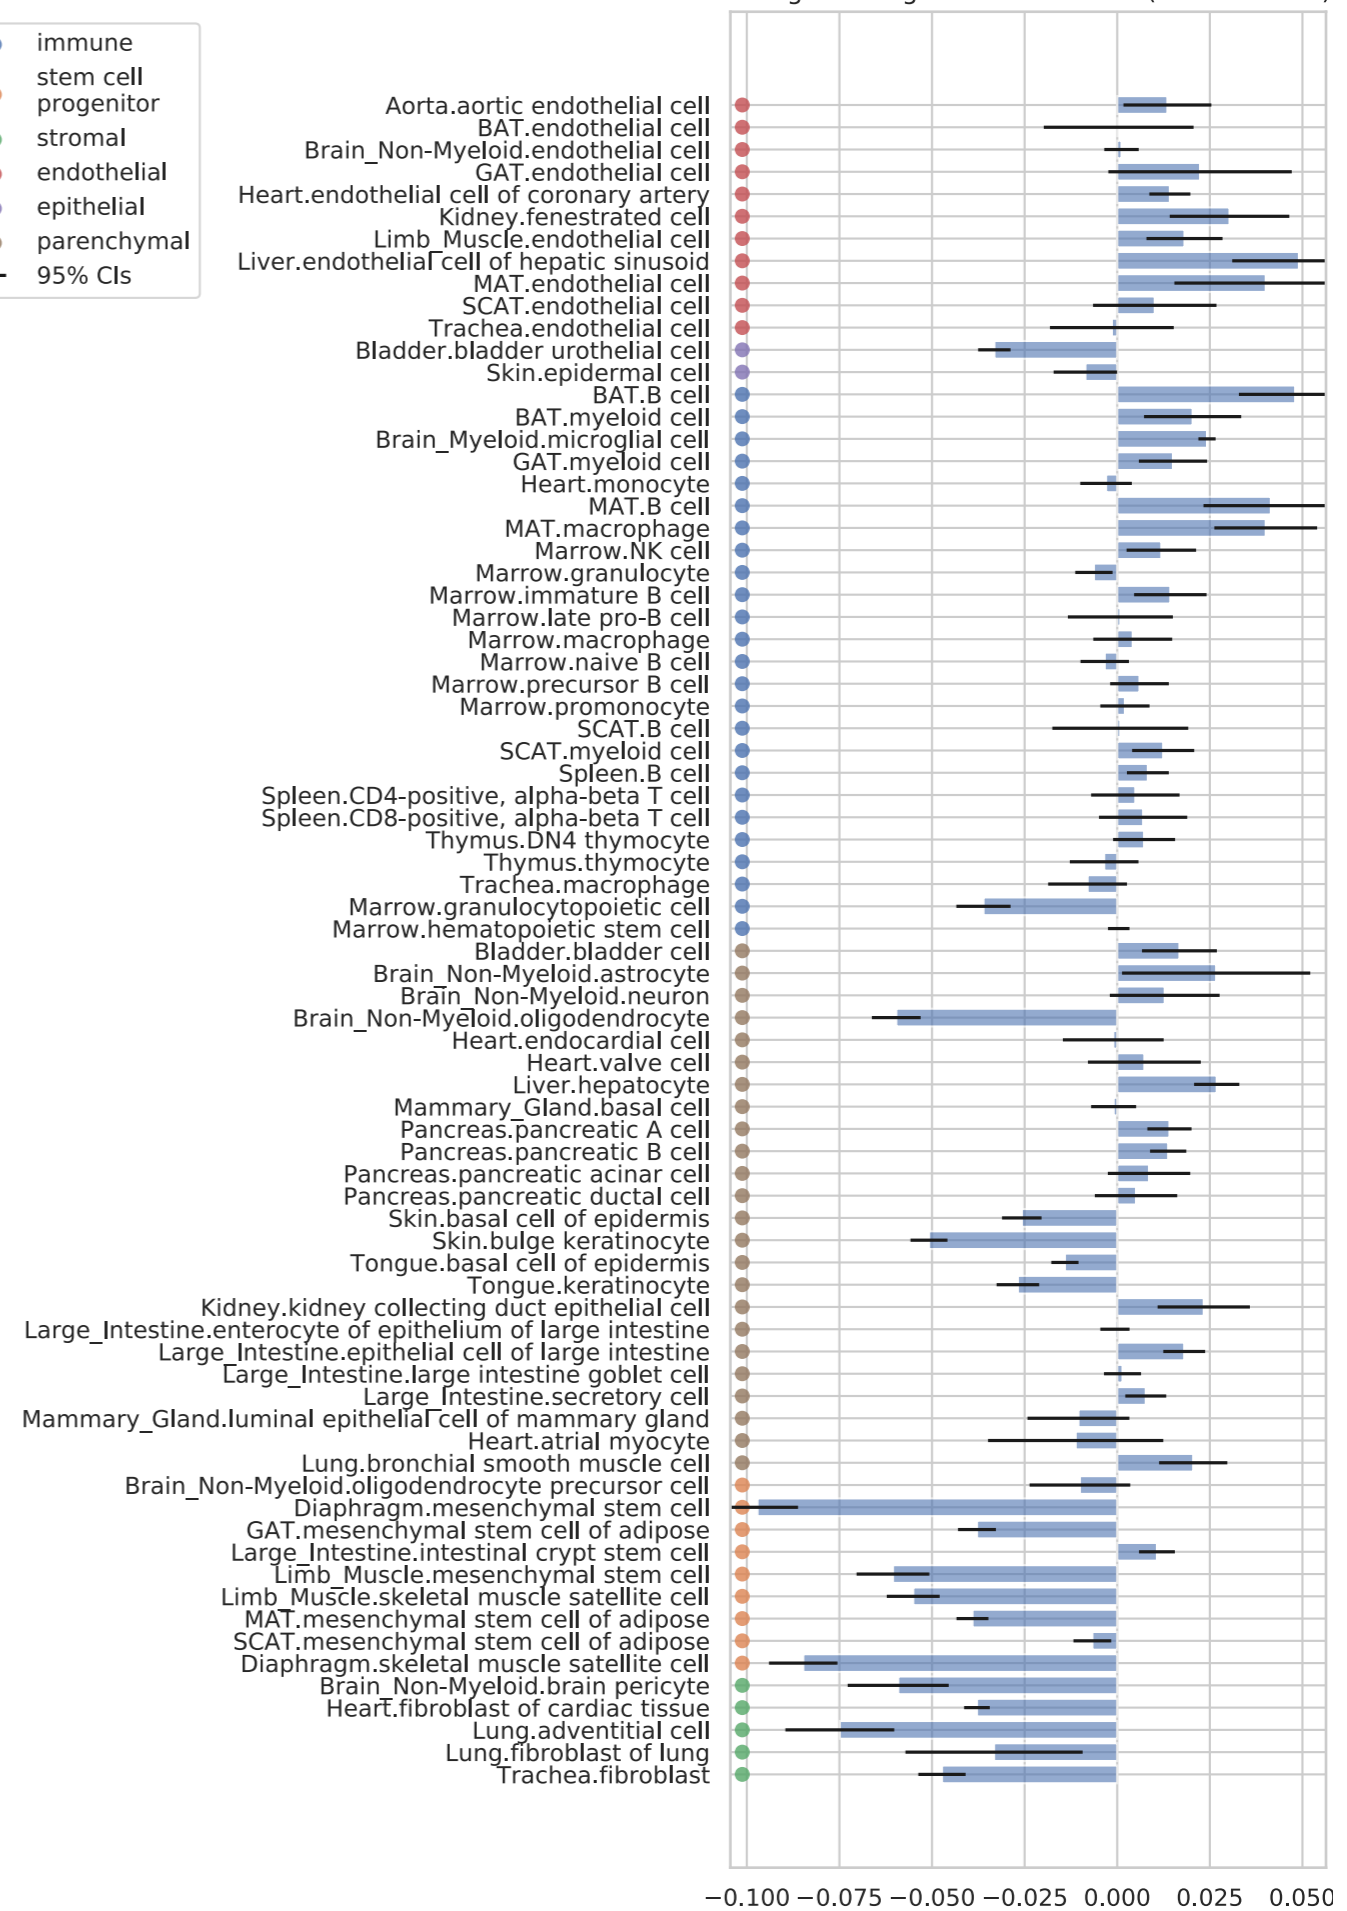

Supplement: supp [file elife-62293-supp-v1.zip › elife_poa_e62293_Figure_4_figure_supplement_2.pdf]
