# Supplementary material for: Mouse aging cell atlas analysis reveals global and cell type-specific aging signatures
Source: eLife journal article supplement (doi:10.7554/elife.62293), 2021-04-12
Supplement: supp [file elife-62293-supp-v1.zip › elife_poa_e62293_Figure_4_source_data_1.xlsx]

## Sheet: Figure 4B
	n_gene	name
spec_func:endothelial	61	endothelial
spec_func:epithelial	14	epithelial
spec_func:immune	63	immune
spec_func:parenchymal	20	parenchymal
spec_func:stem cell/progenitor	76	stem cell/progenitor
spec_func:stromal	74	stromal
