# Supplementary figures and images for: Mouse aging cell atlas analysis reveals global and cell type-specific aging signatures
Source: eLife journal article supplement (doi:10.7554/elife.62293), 2021-04-12

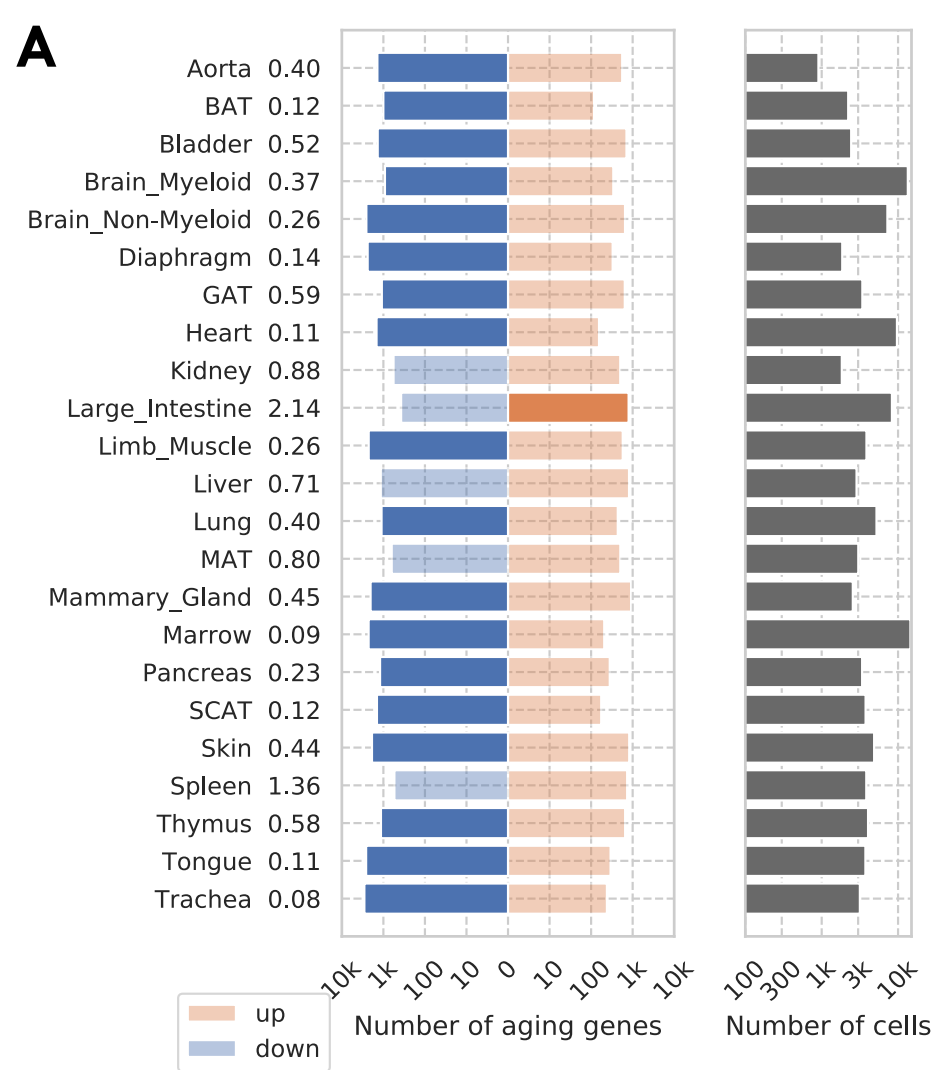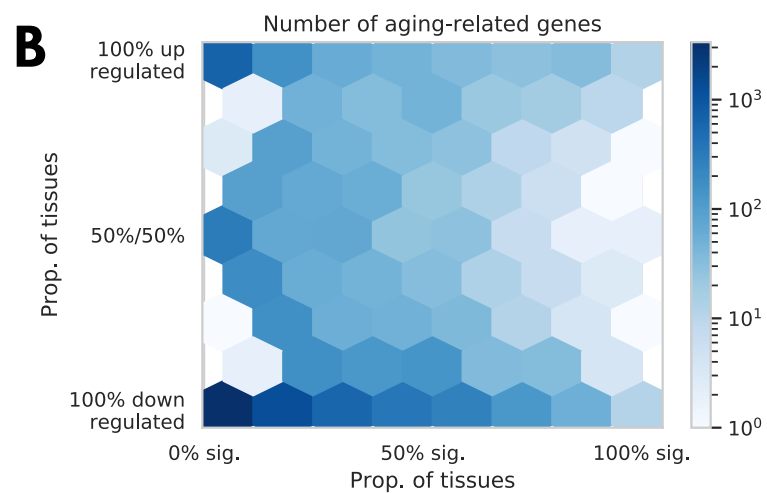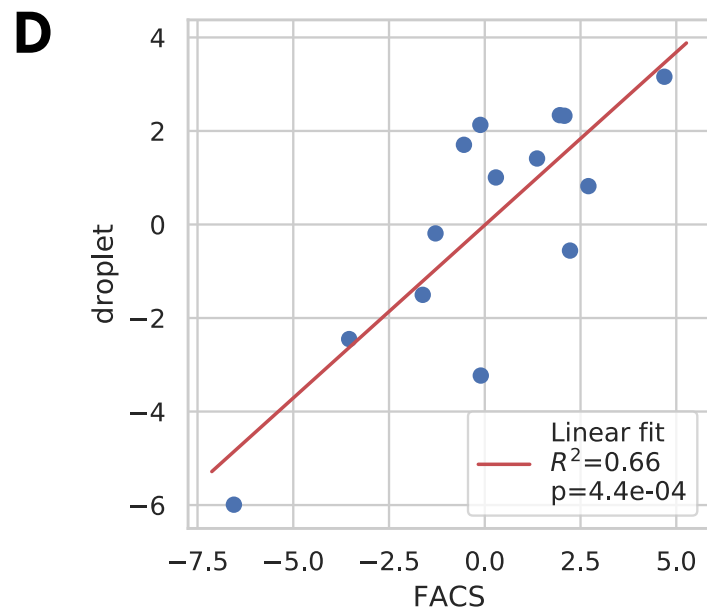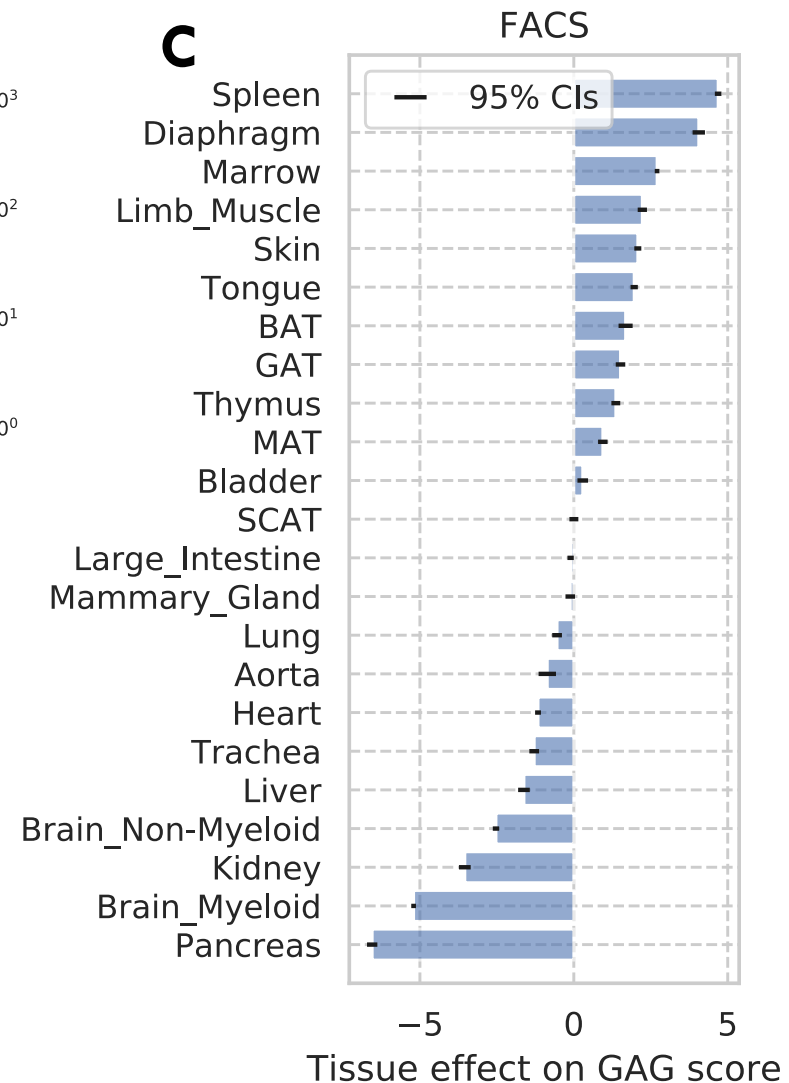

Supplement: supp [file elife-62293-supp-v1.zip]

**A**

Histogram of genes used for  
computing the GAG score

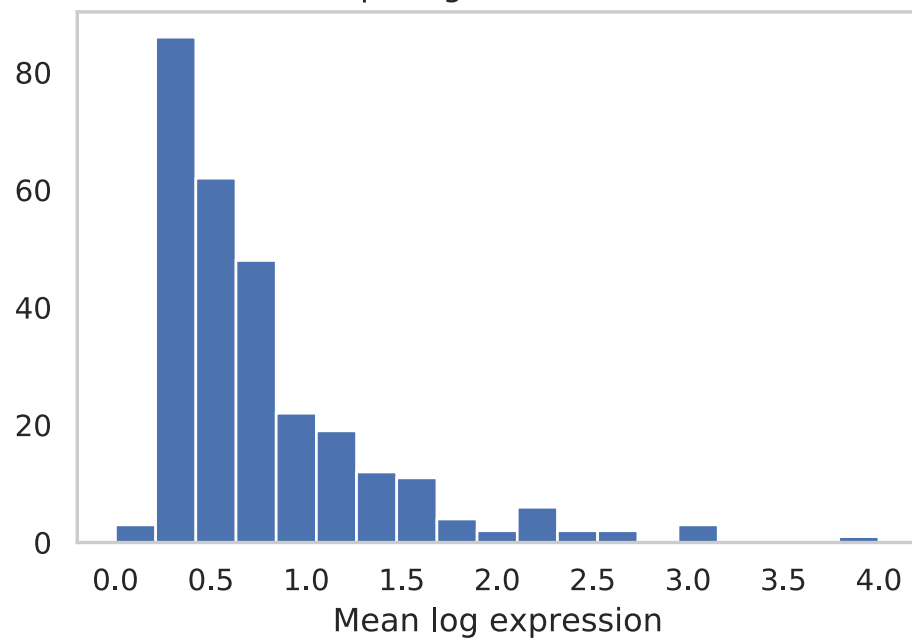**B**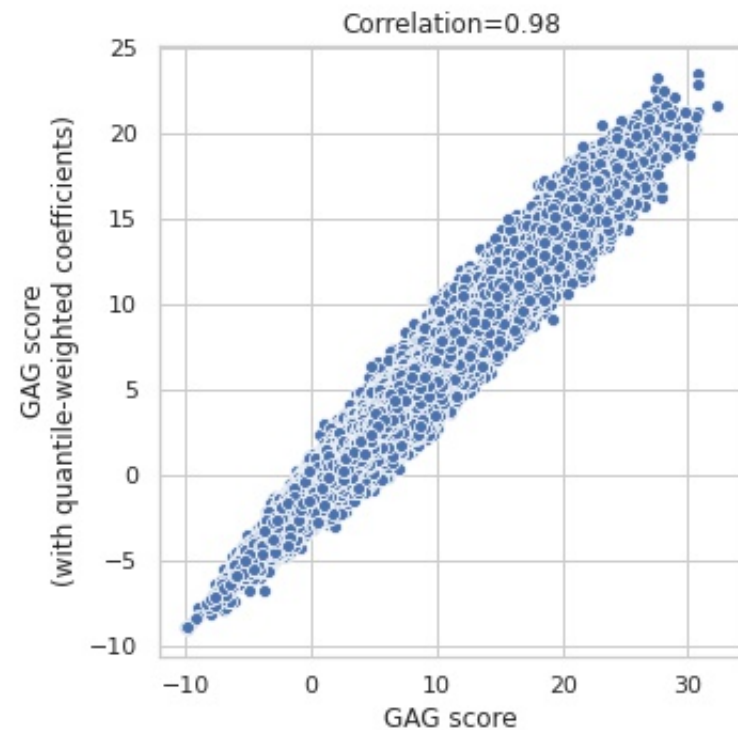**C**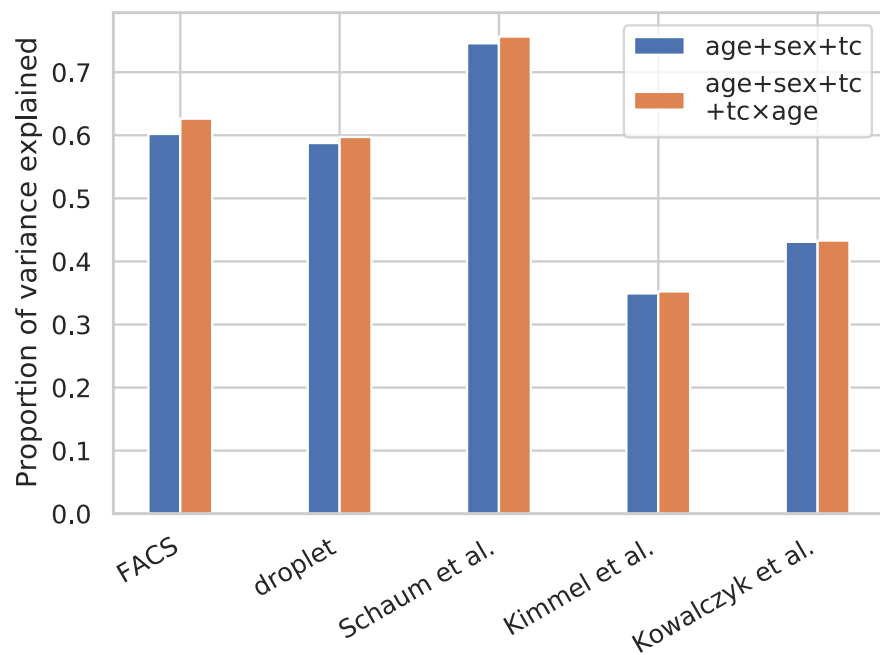

Supplement: supp [file elife-62293-supp-v1.zip]

**A**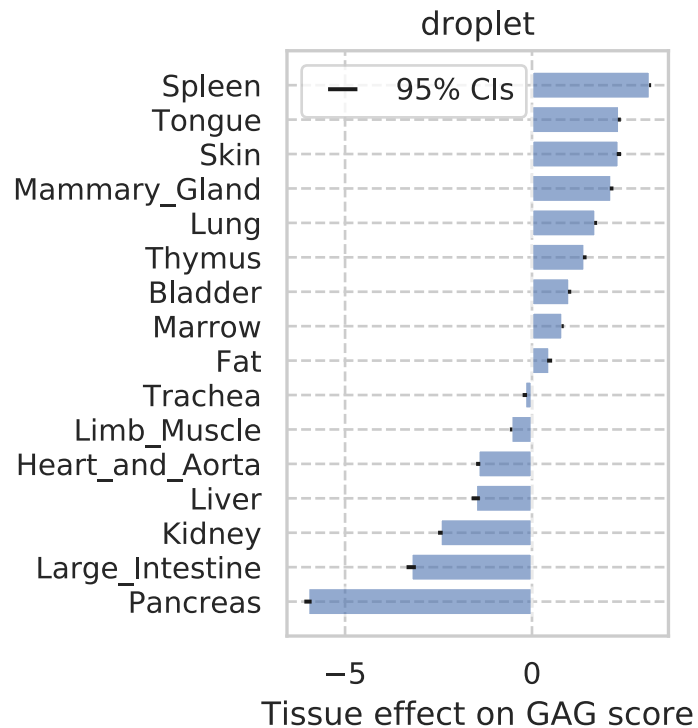**B**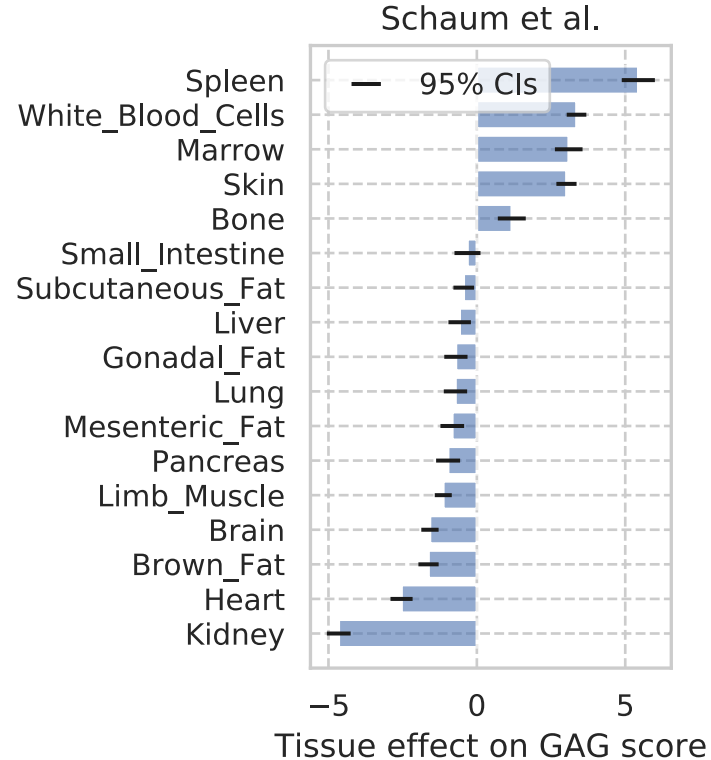

Supplement: supp [file elife-62293-supp-v1.zip]

**A**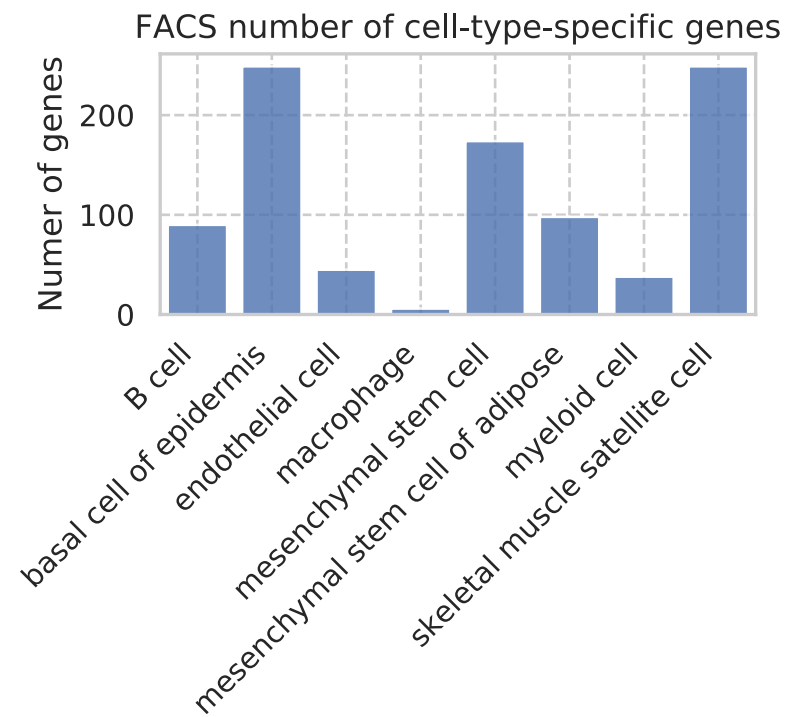**B**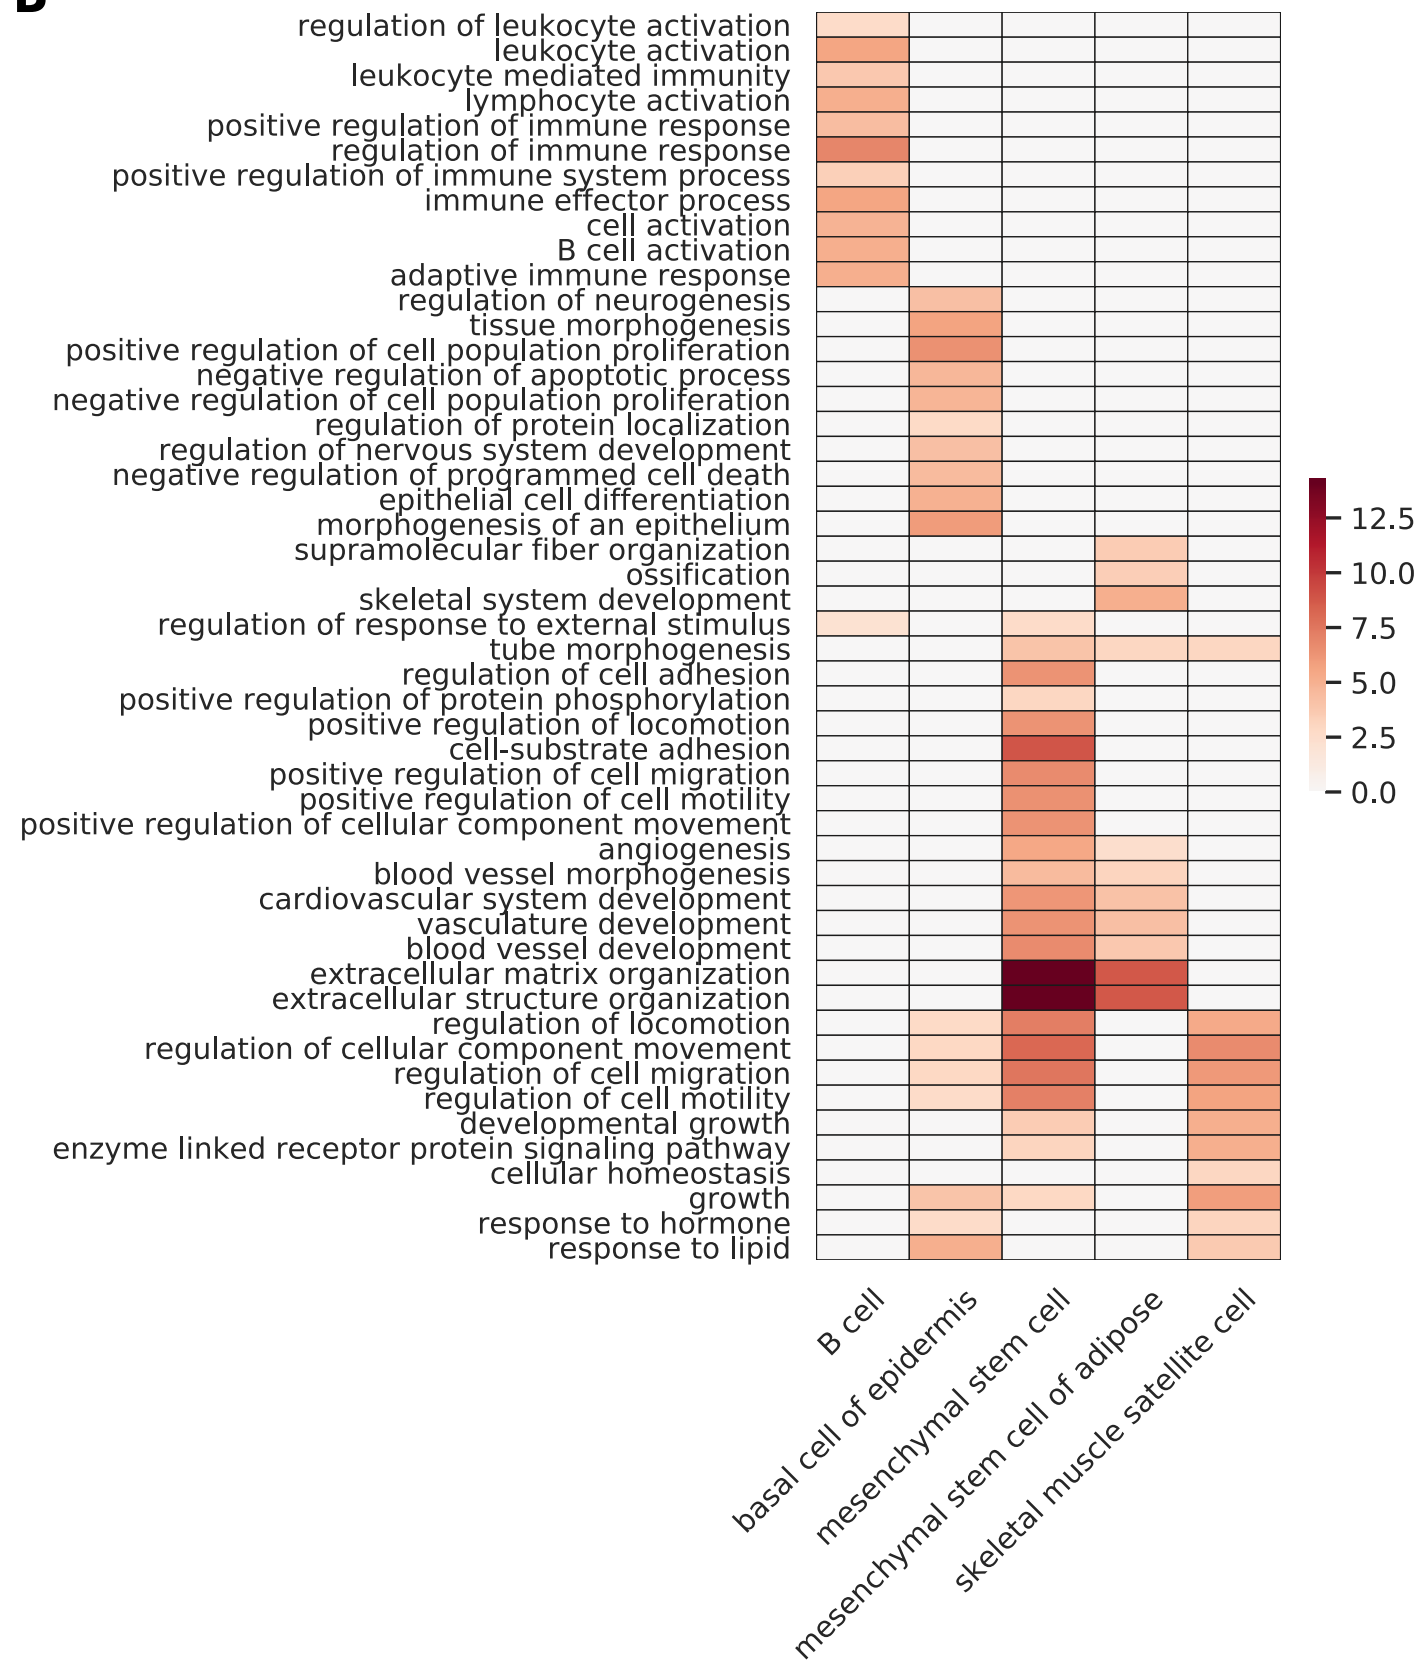

Supplement: supp [file elife-62293-supp-v1.zip]

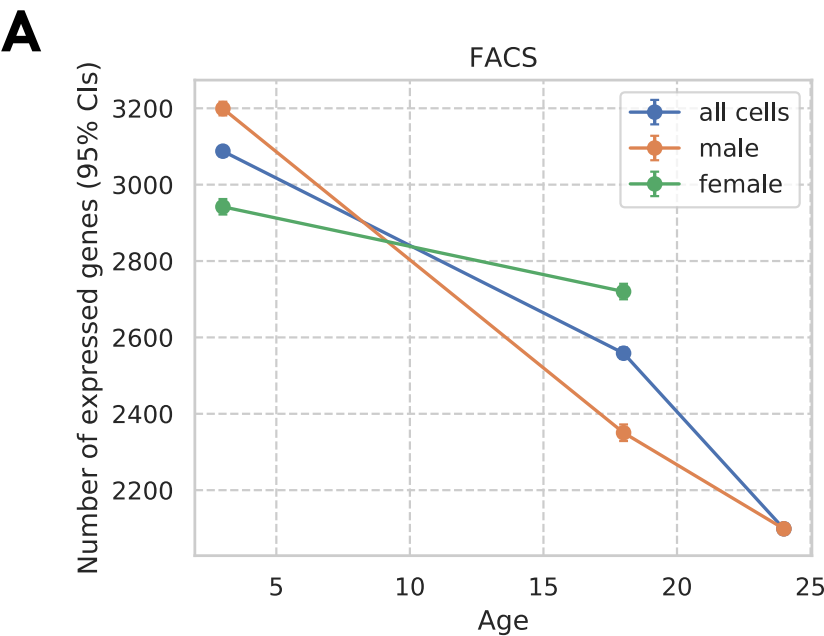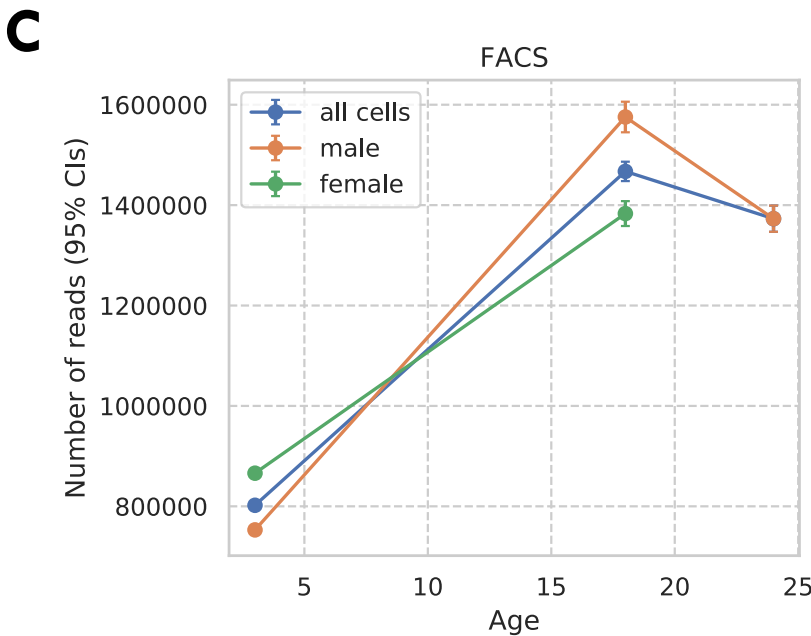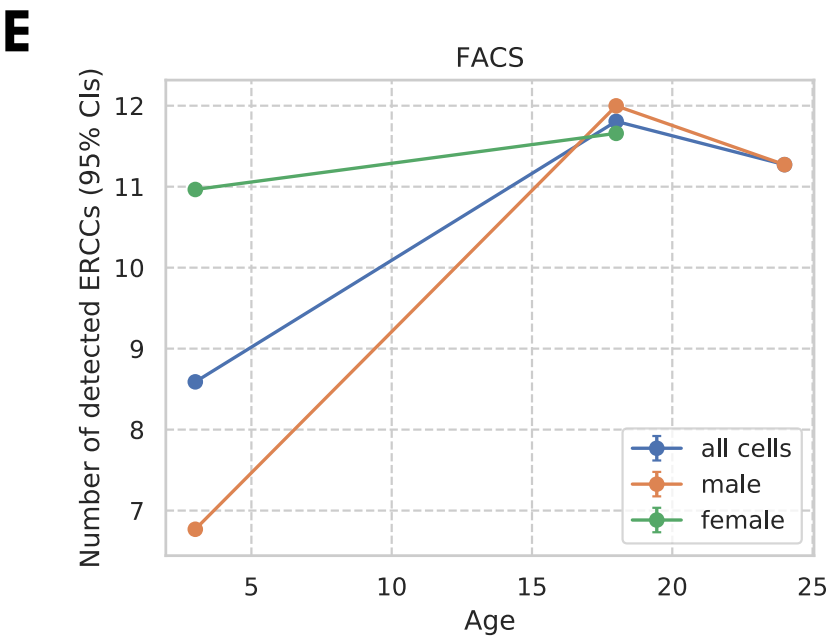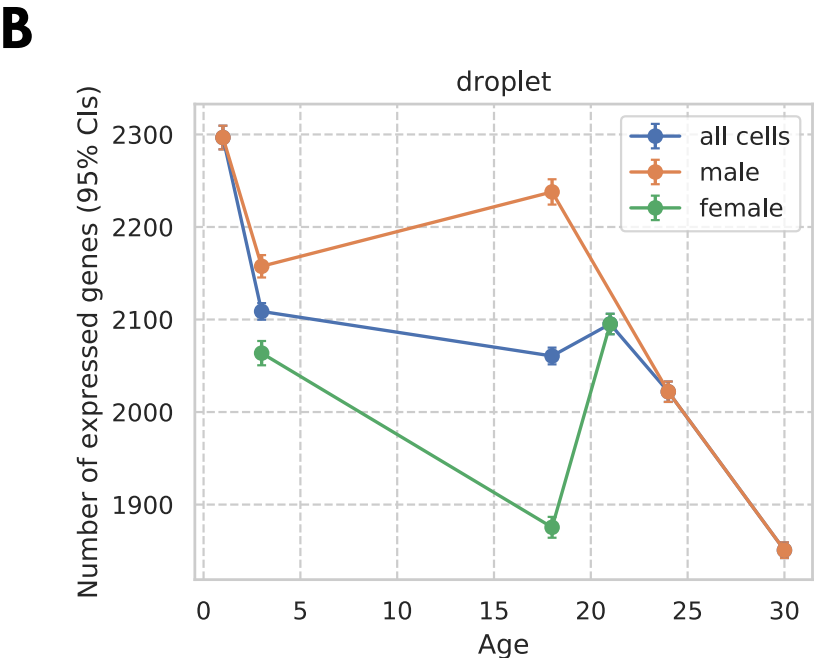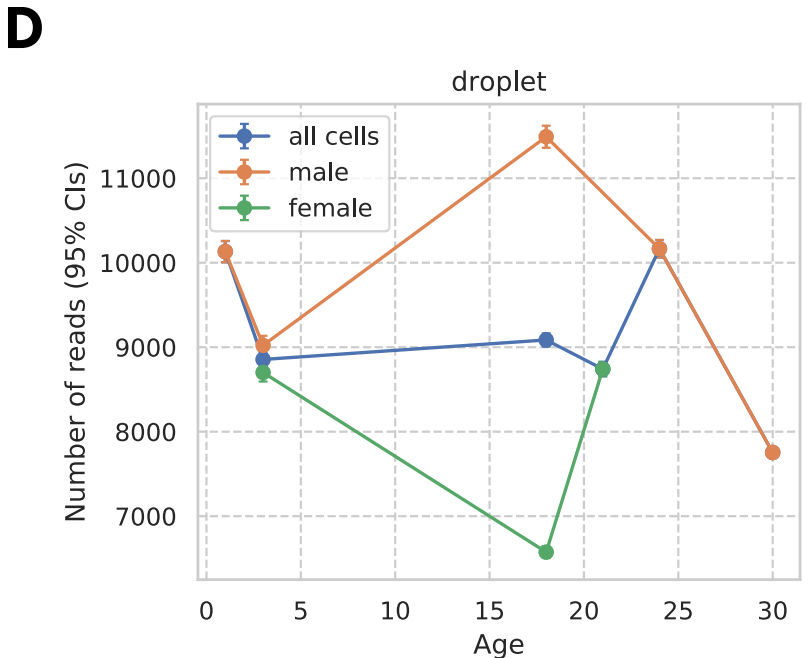

Supplement: supp [file elife-62293-supp-v1.zip]

**A**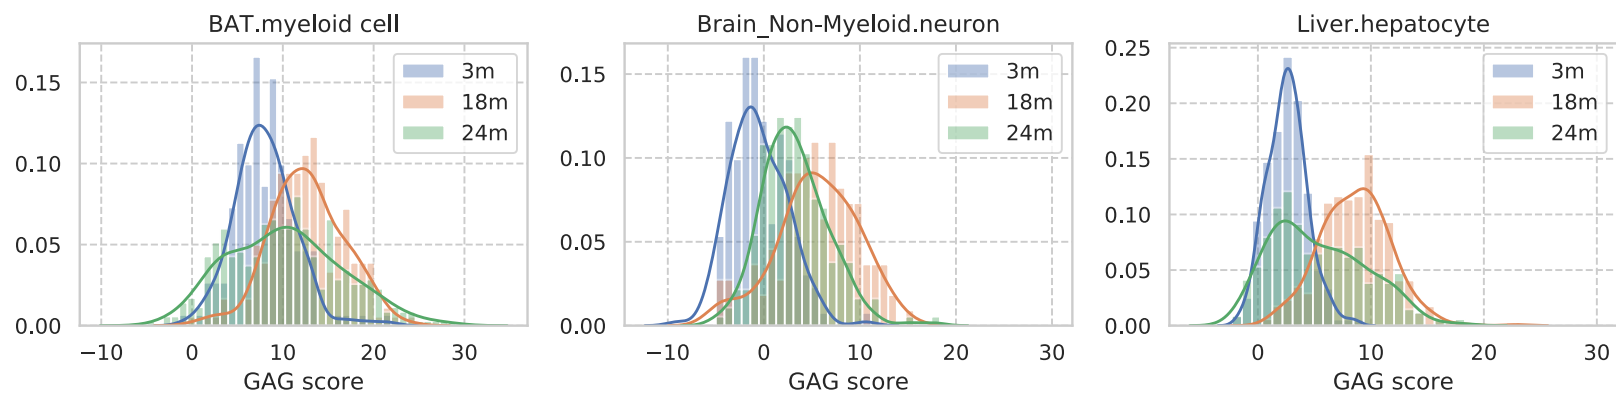**B**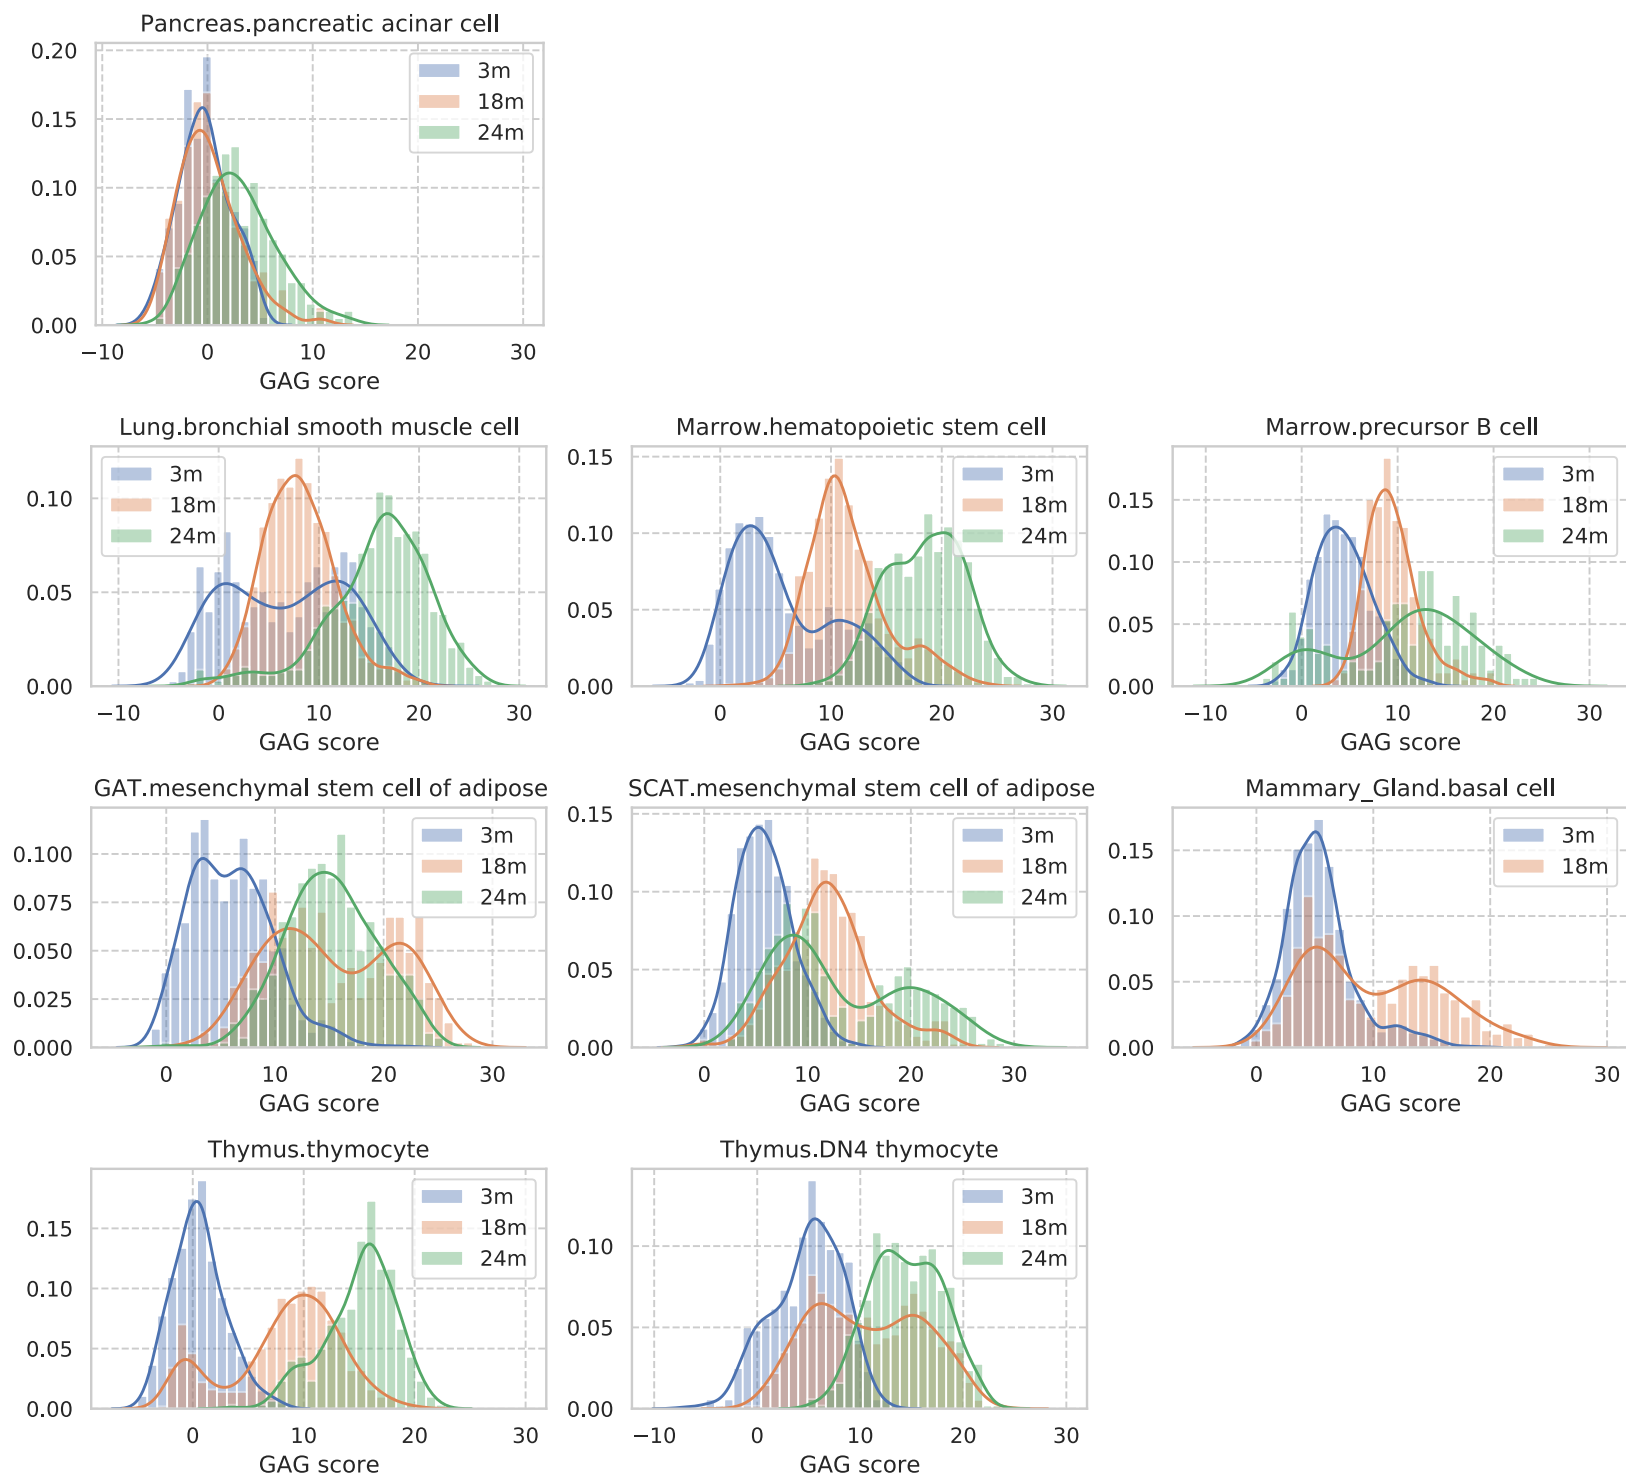

Supplement: supp [file elife-62293-supp-v1.zip]

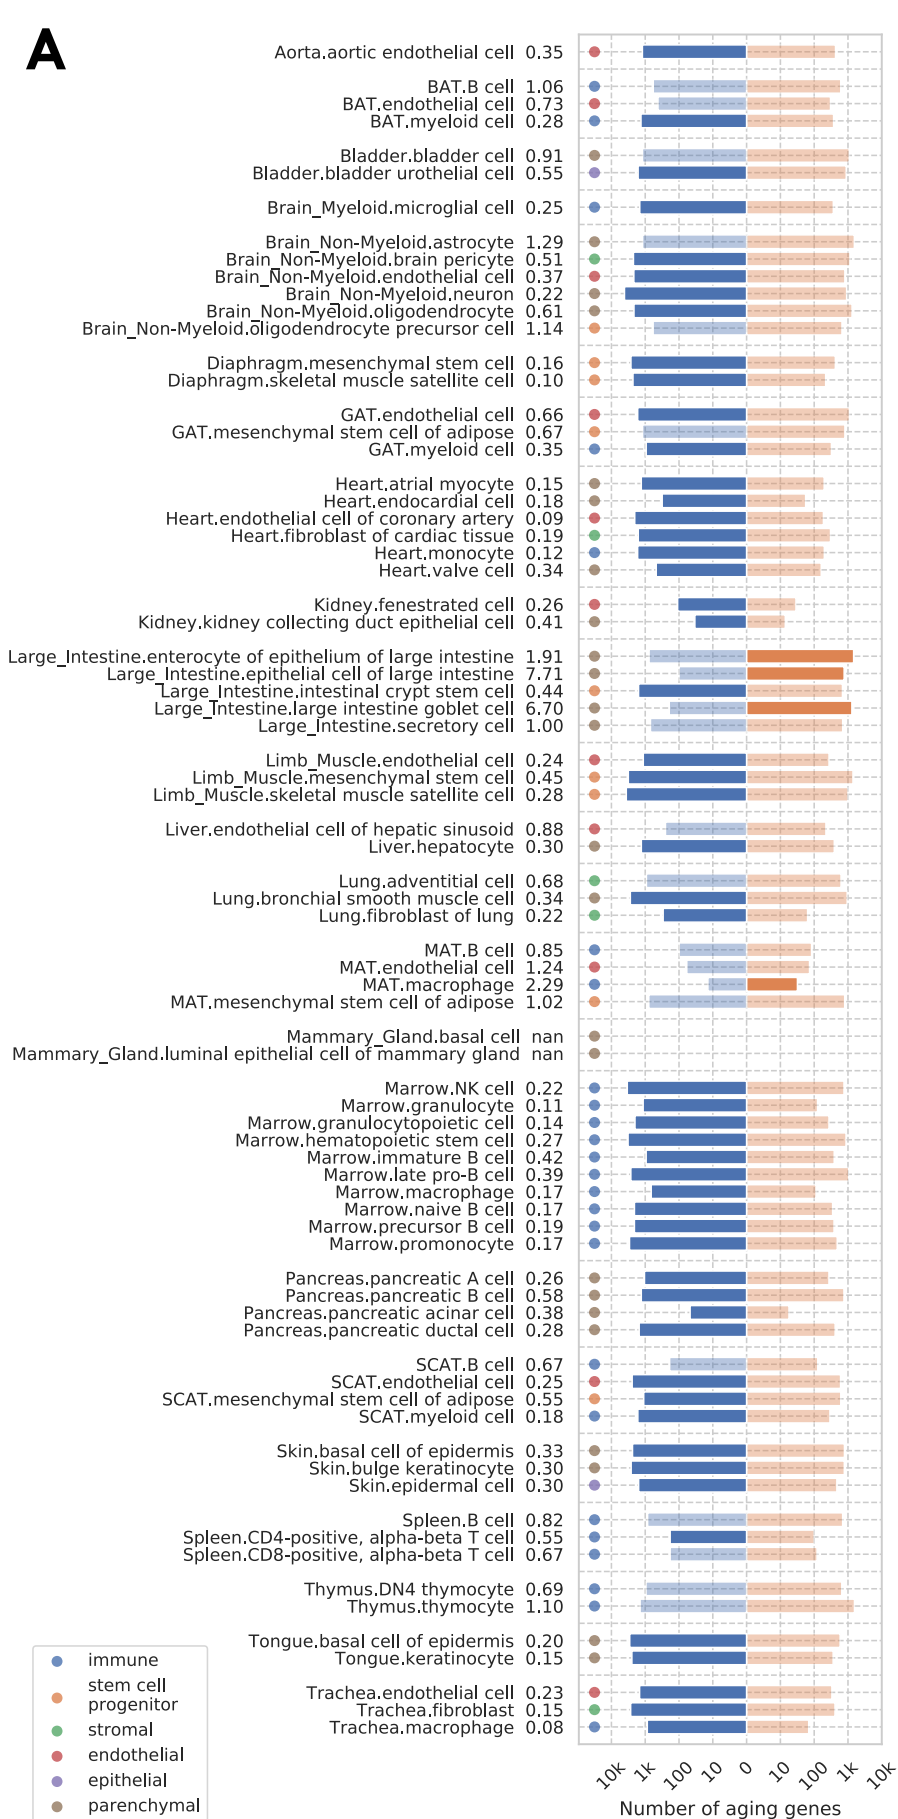

**FACS, all males**

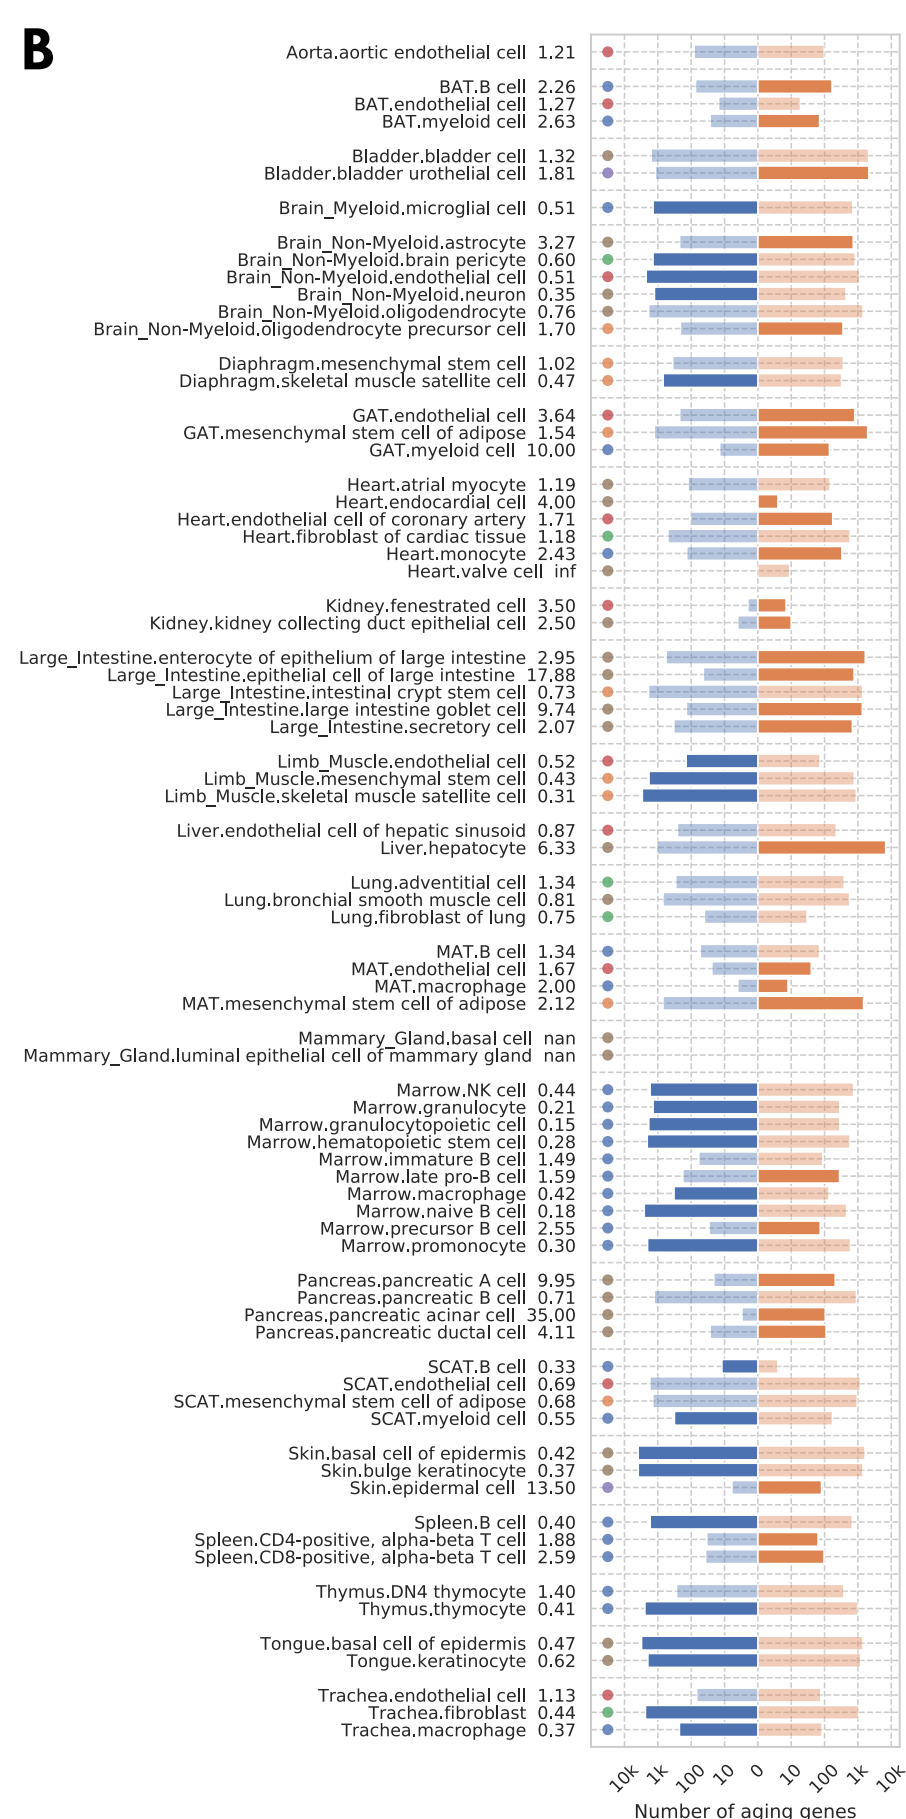

**FACS, 3m and 18m males**

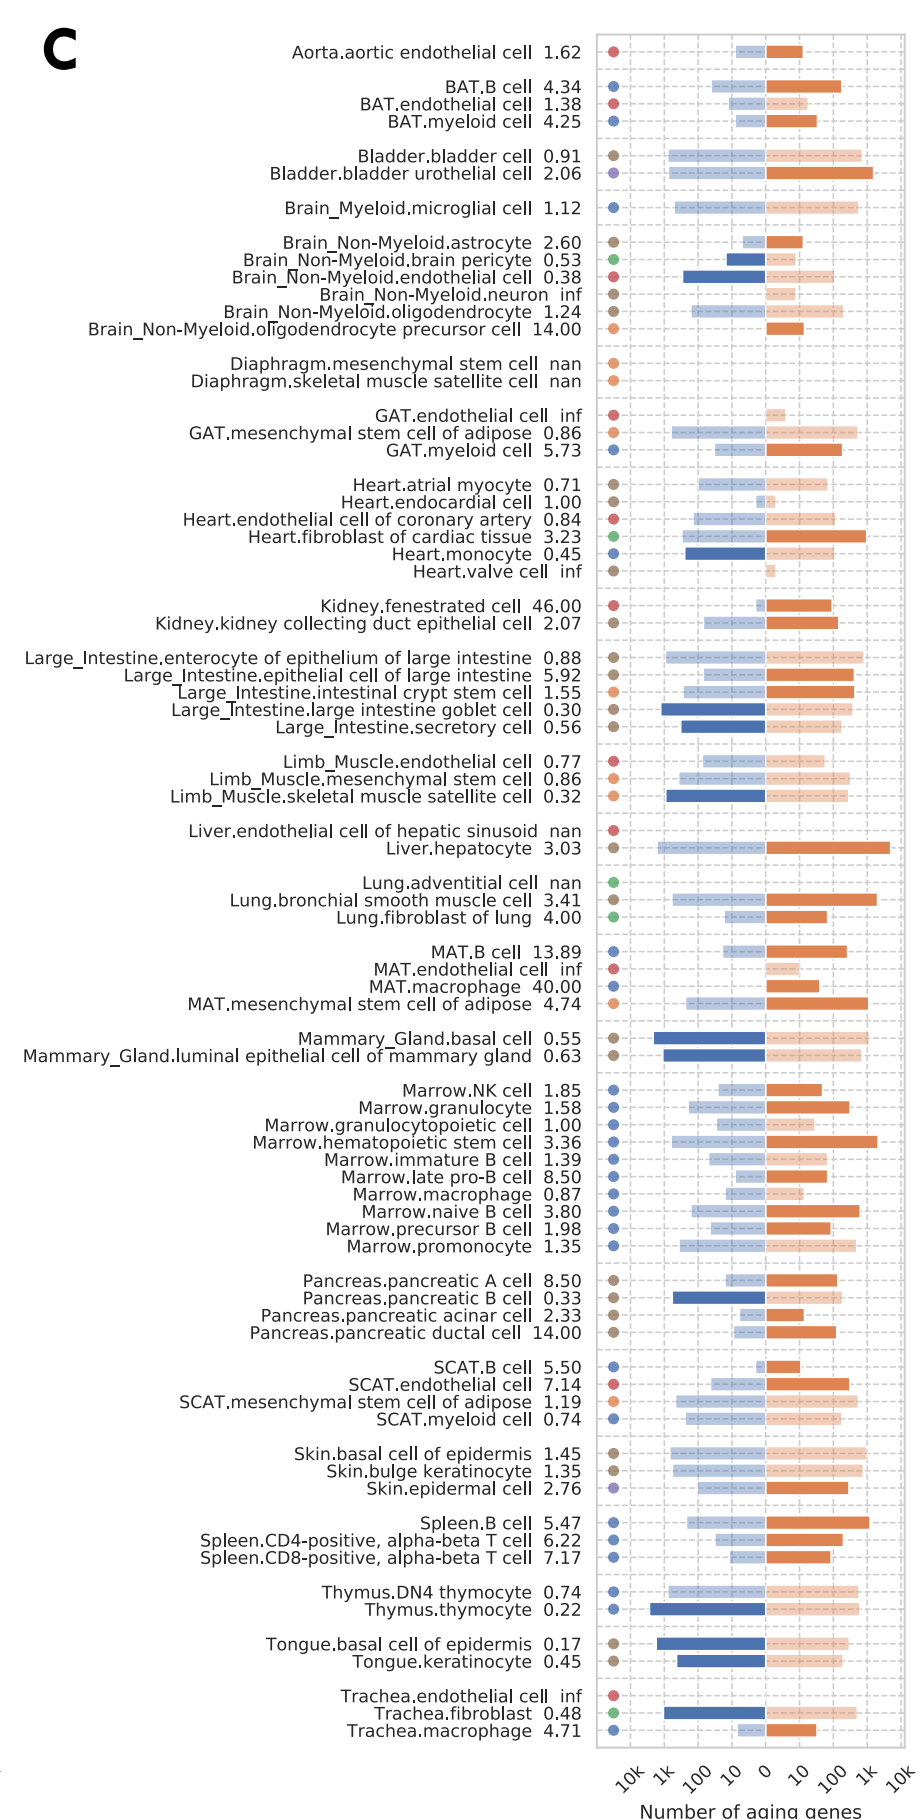

**FACS, all females (3m and 18m)**

Supplement: supp [file elife-62293-supp-v1.zip]

Age coefficients of functional-category-specific genes

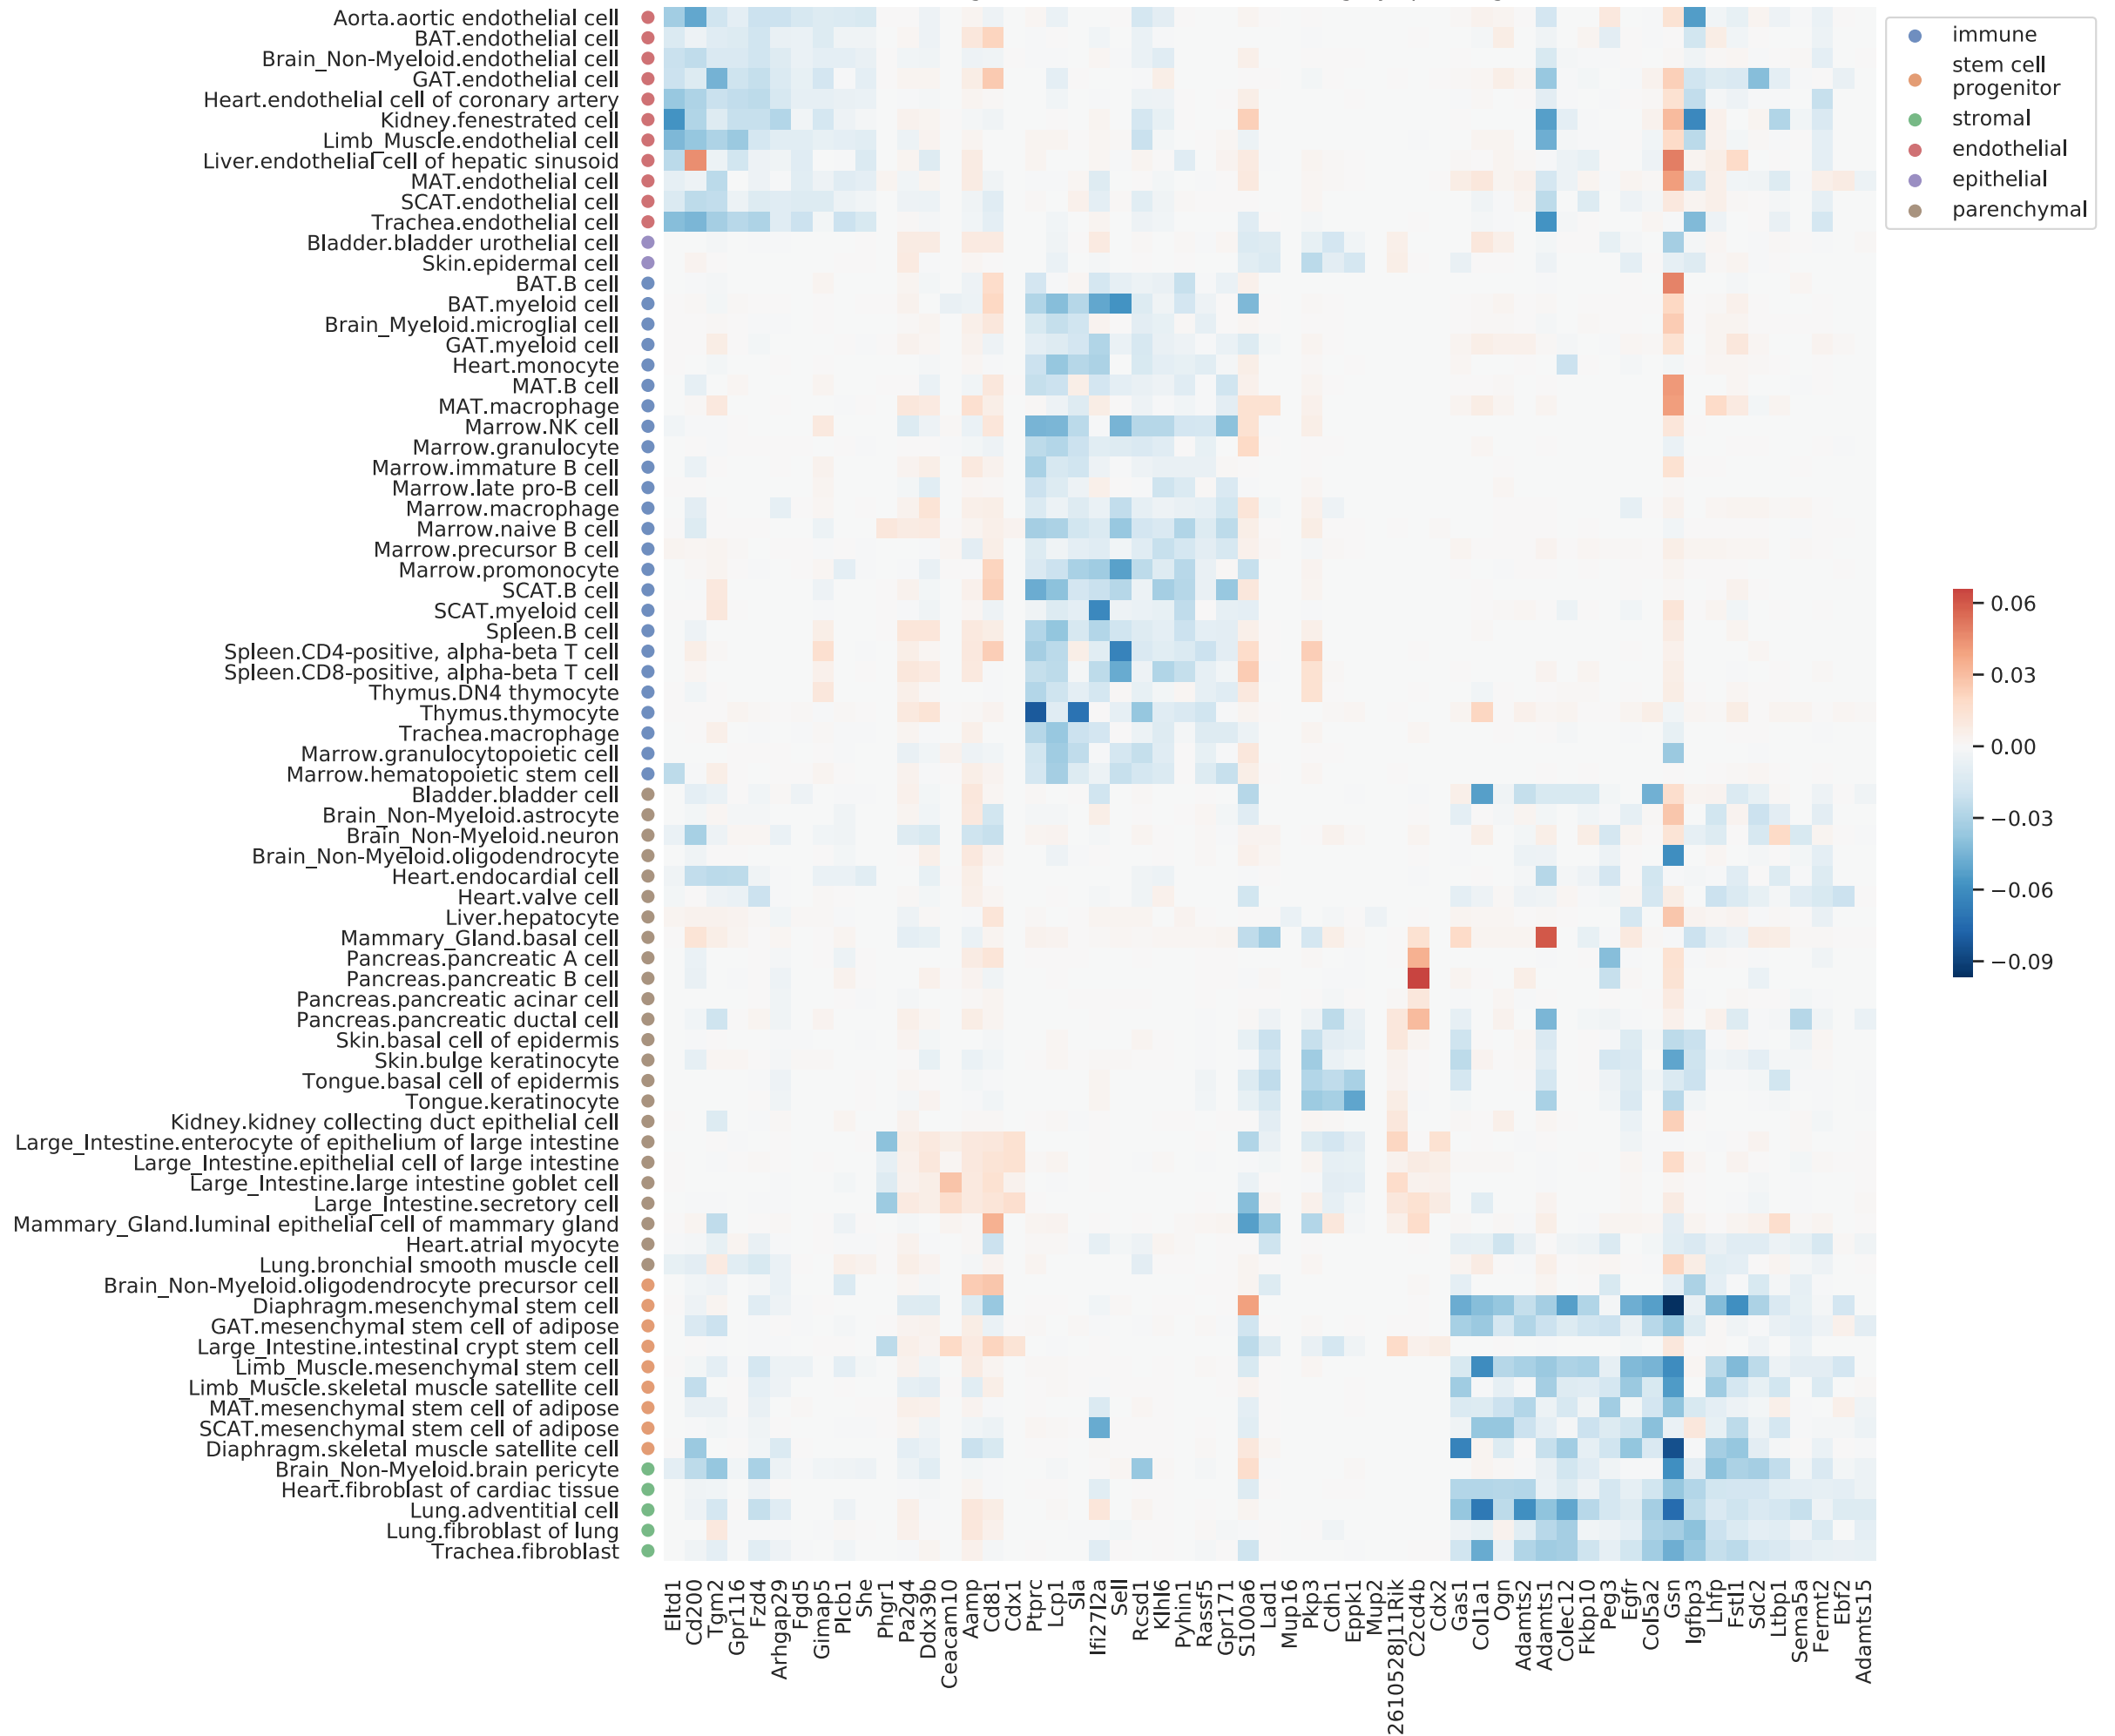

Supplement: supp [file elife-62293-supp-v1.zip]

**A**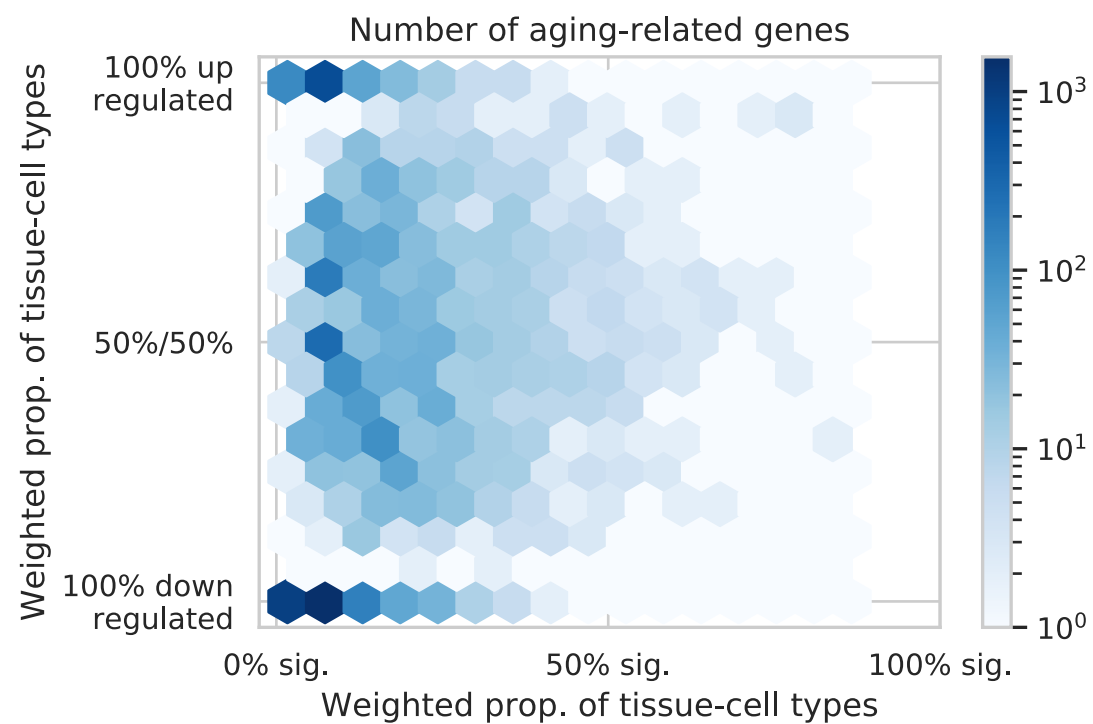**droplet data (tissue-cell level)****B**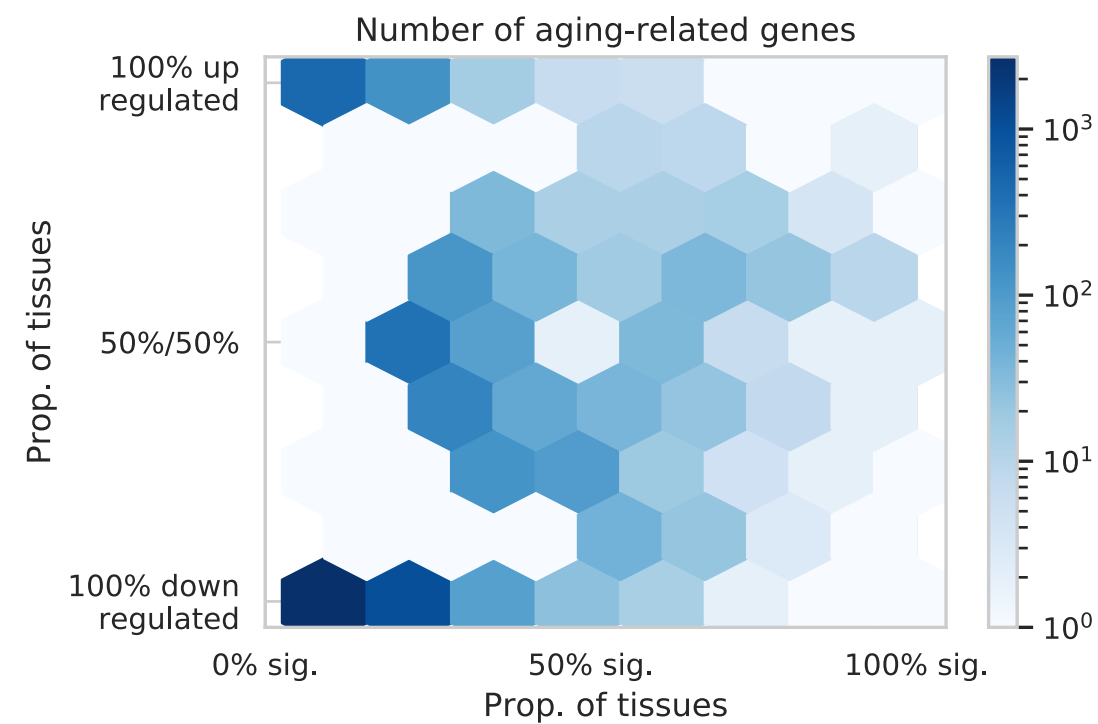**droplet data (tissue level)****C**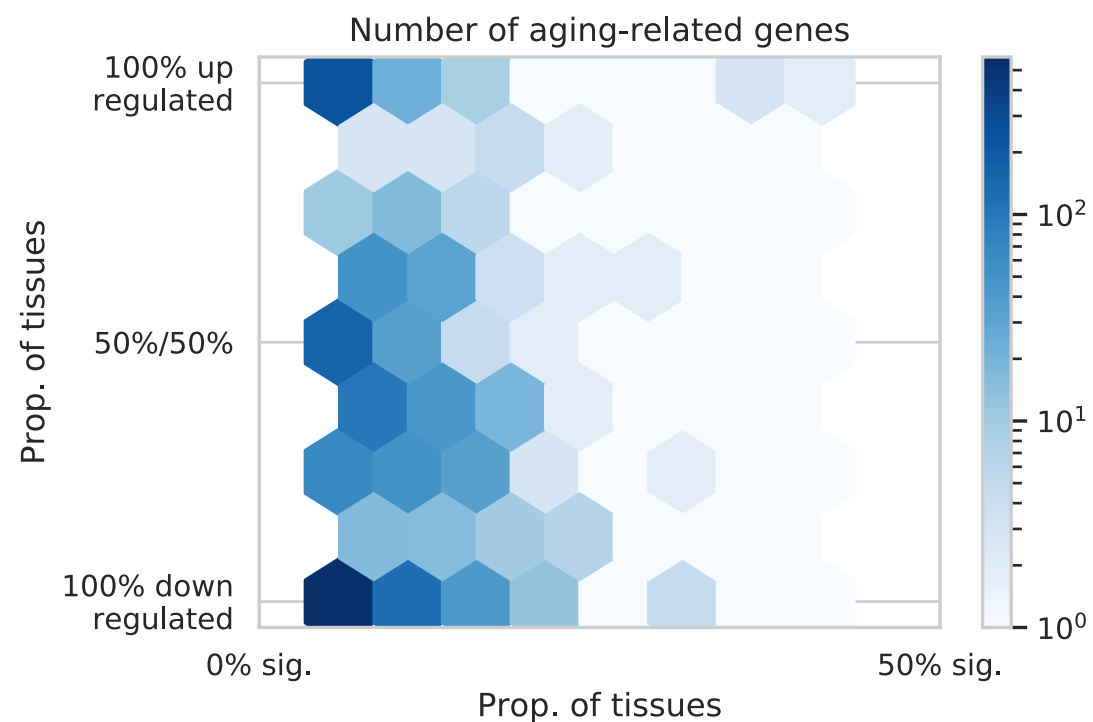**bulk data (tissue level)****D**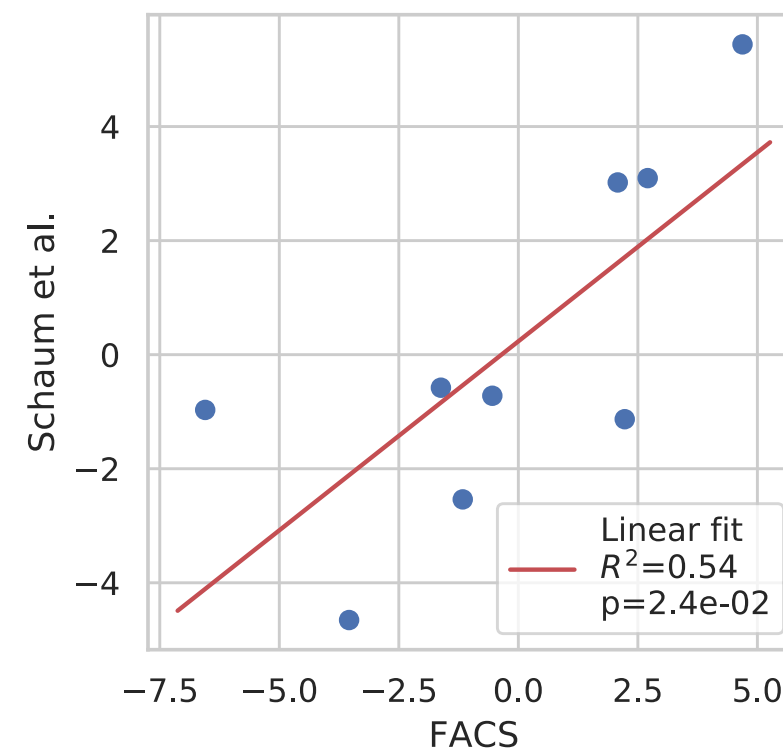

Supplement: supp [file elife-62293-supp-v1.zip]

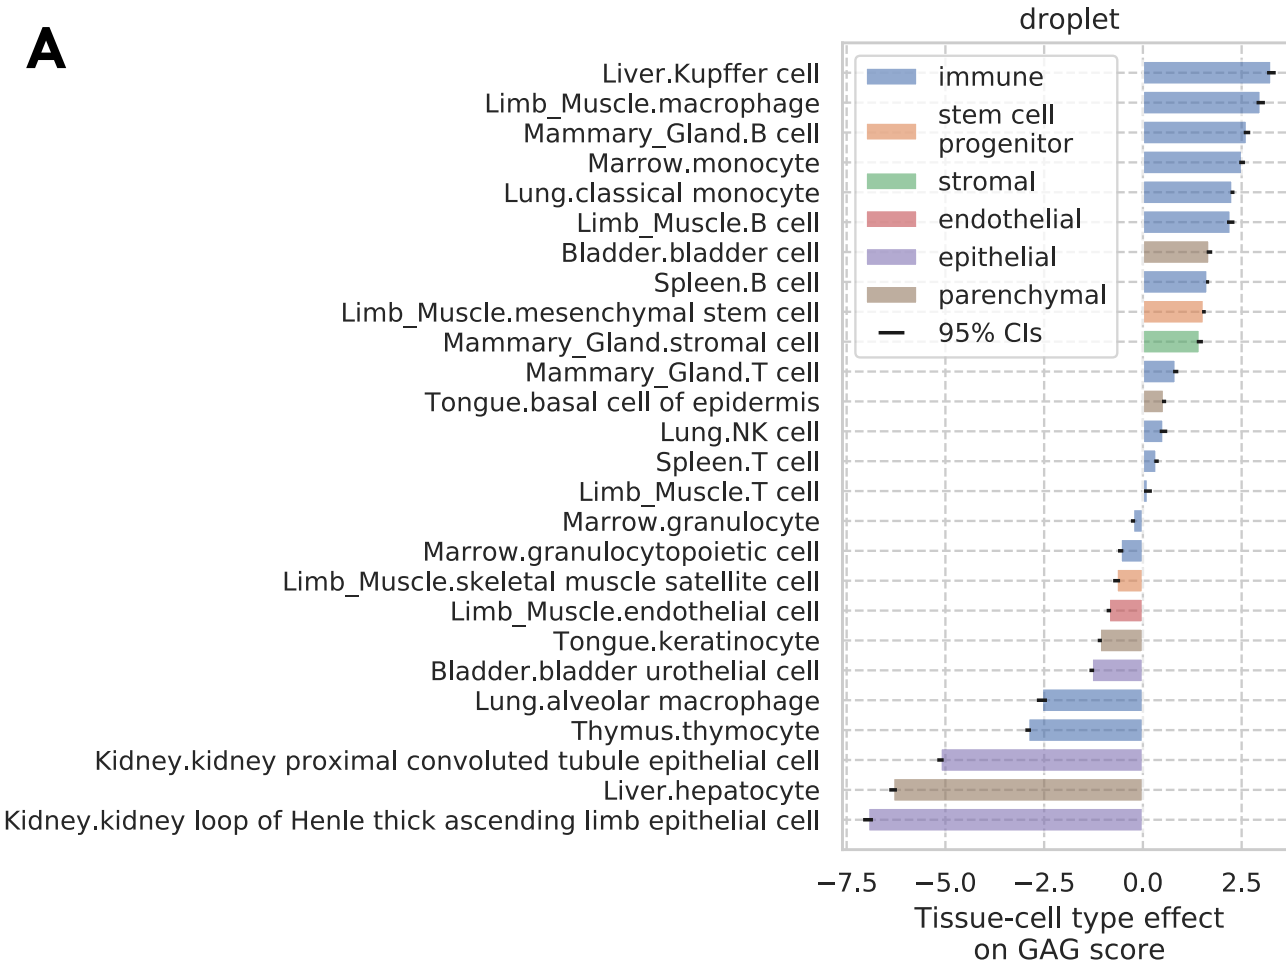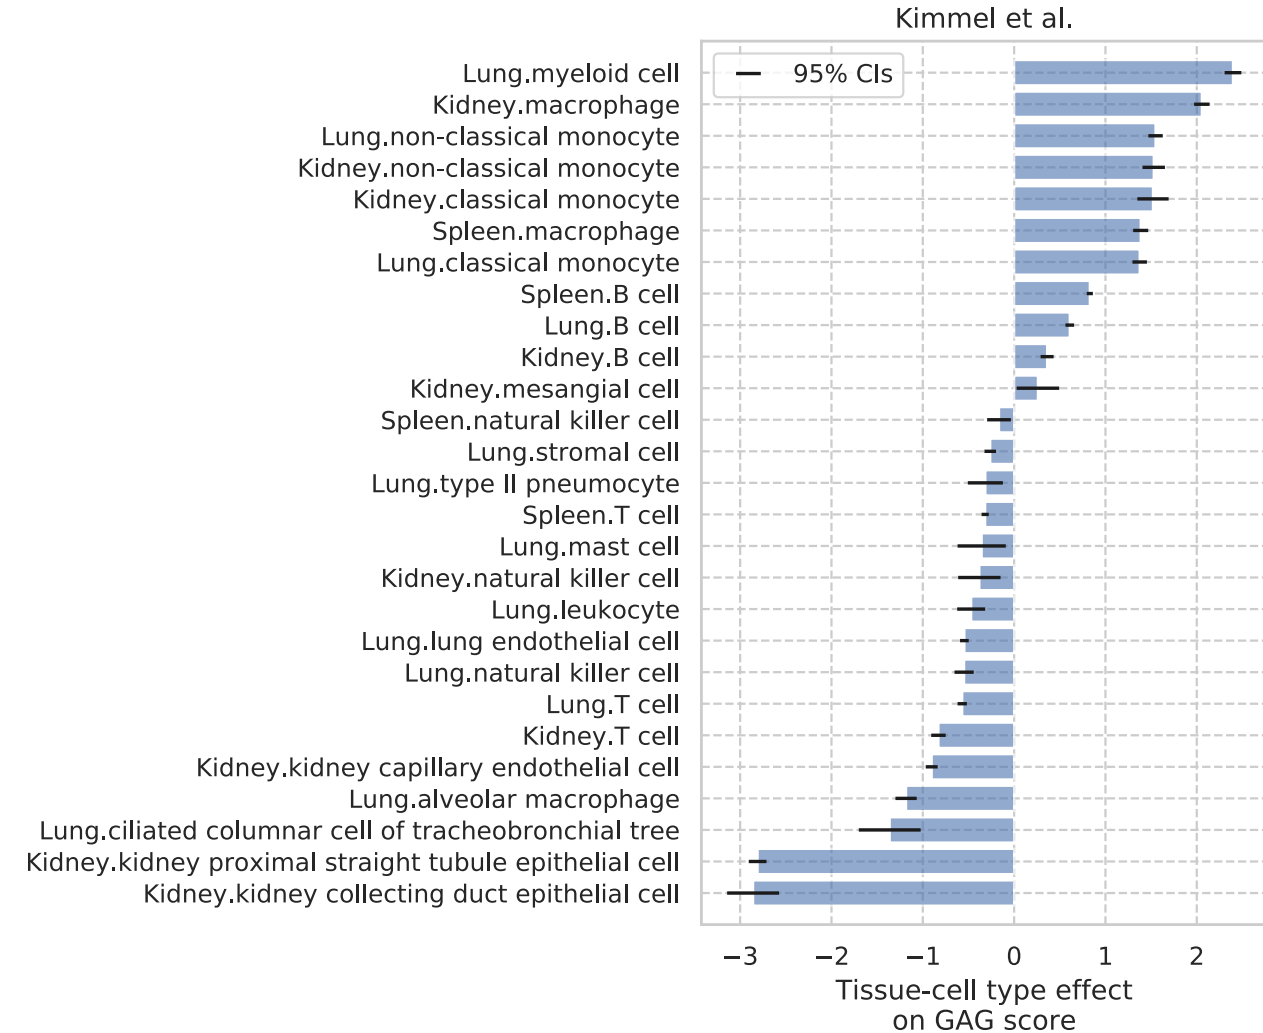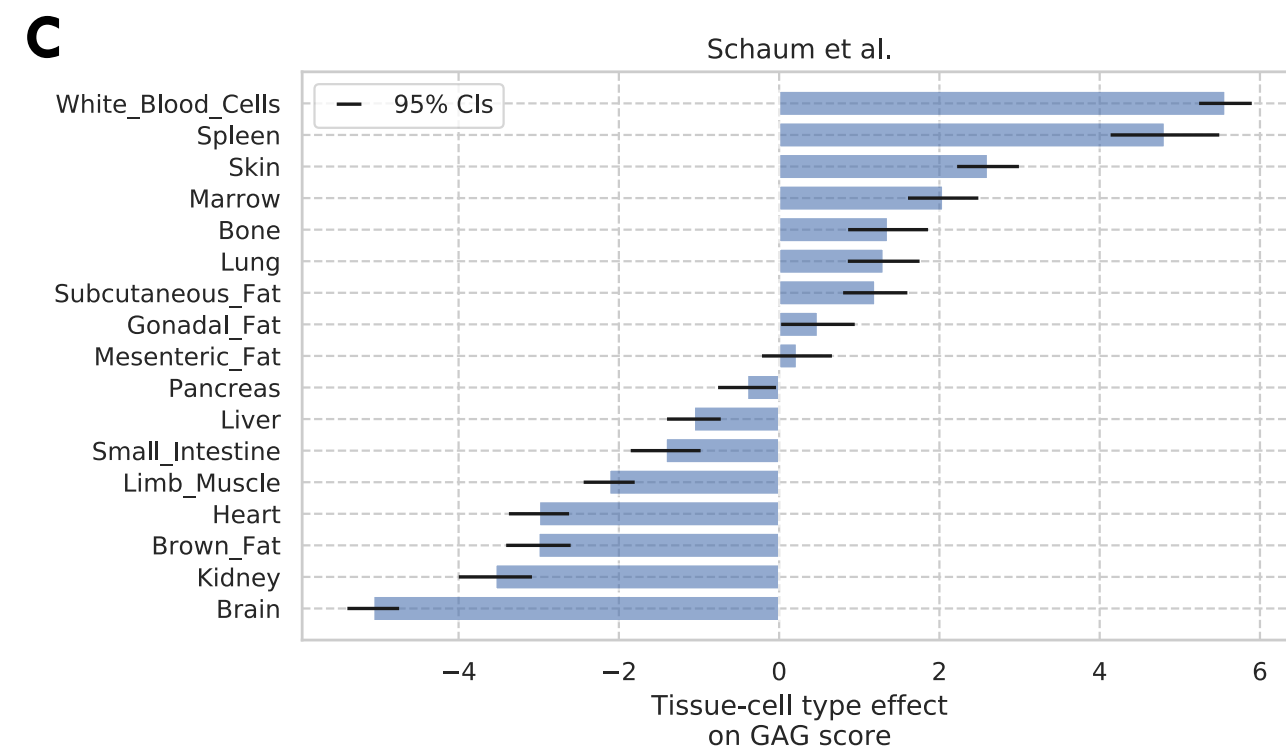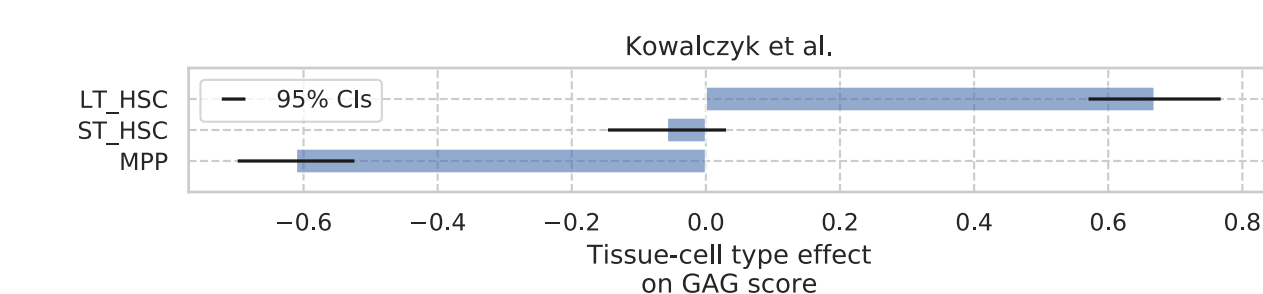

Supplement: supp [file elife-62293-supp-v1.zip]

Prop. of overlap of FACS aging-related genes with GenAge aging related genes

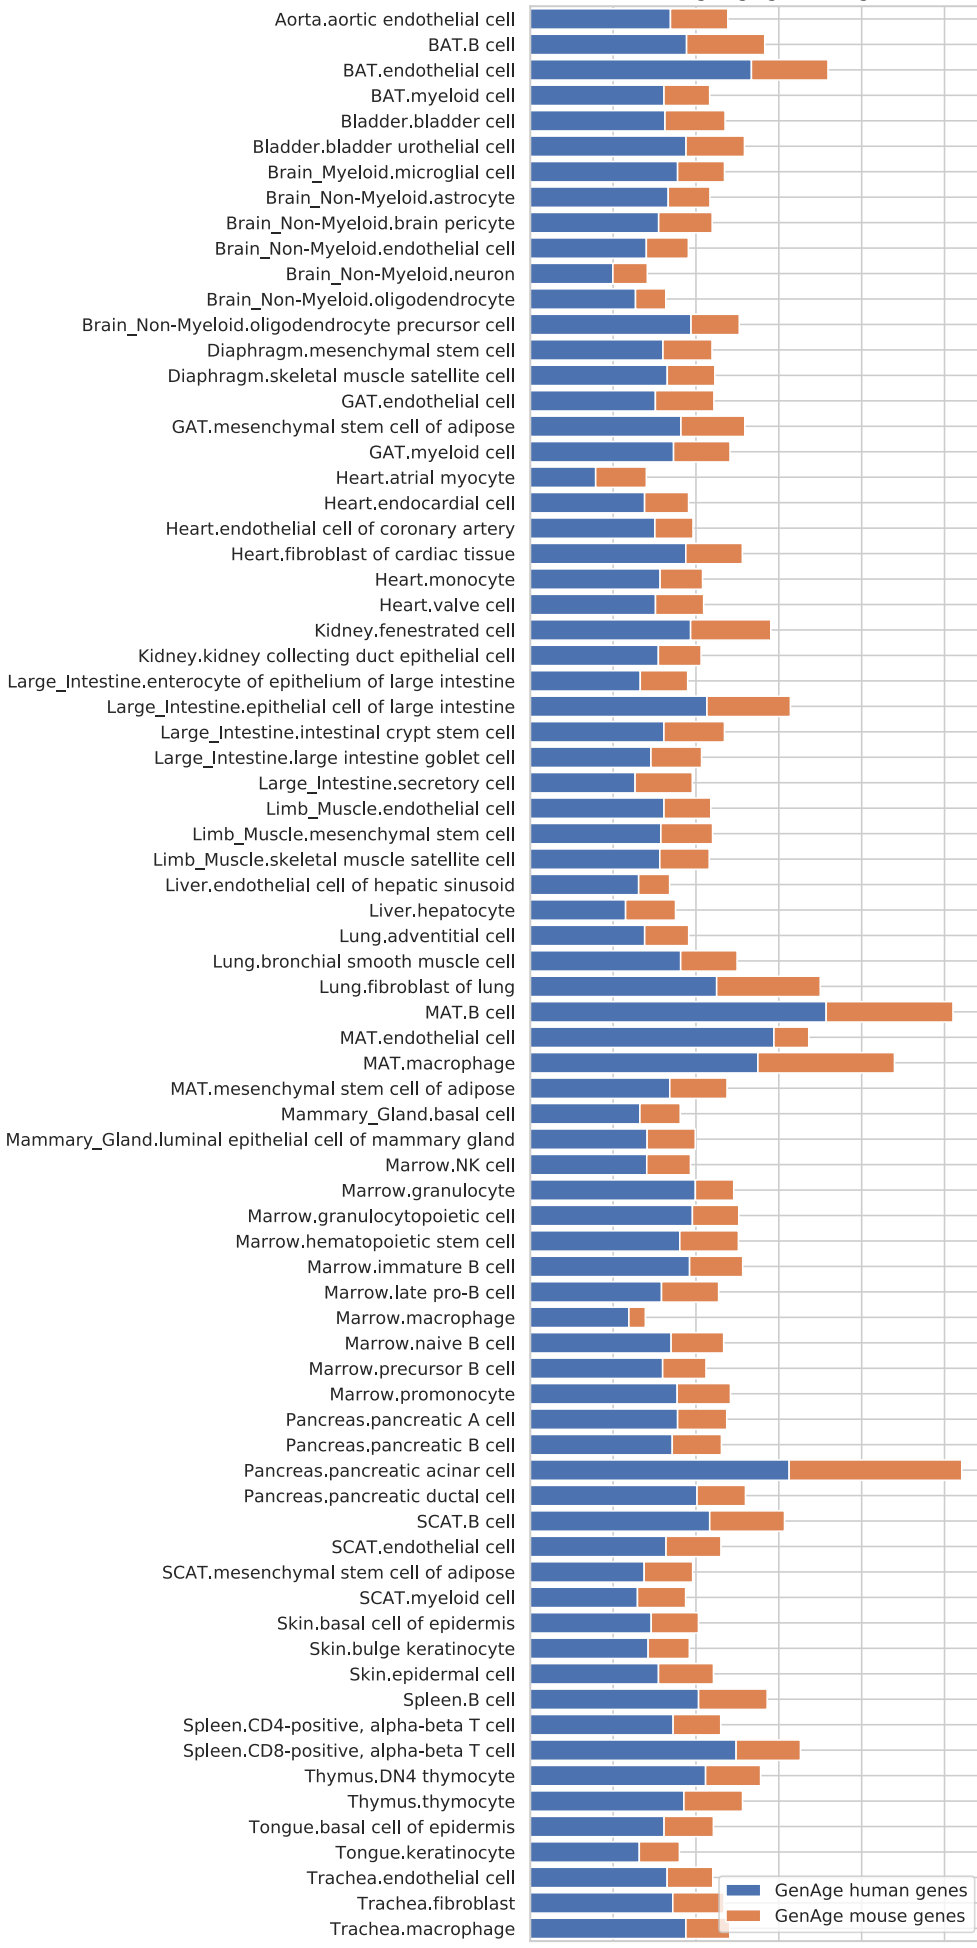

Supplement: supp [file elife-62293-supp-v1.zip]

**A**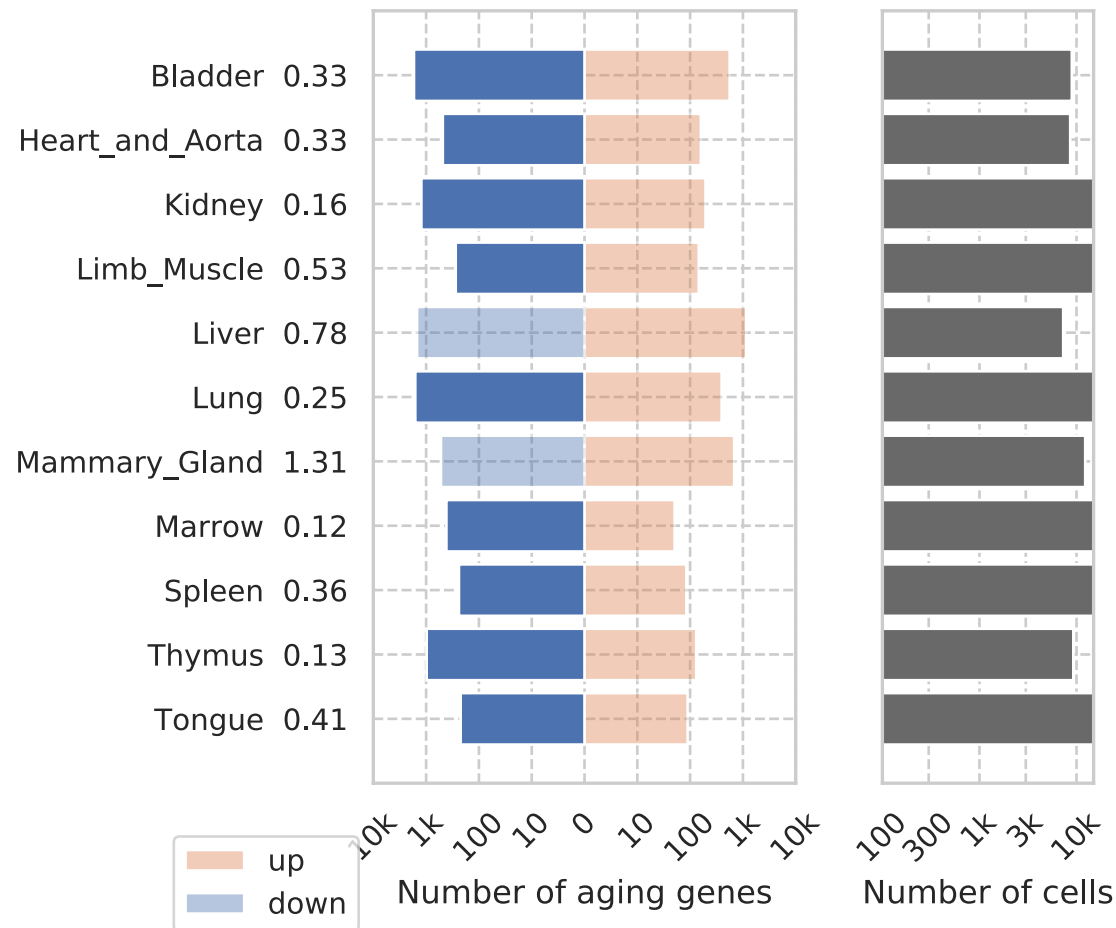**droplet data (tissue level)****B**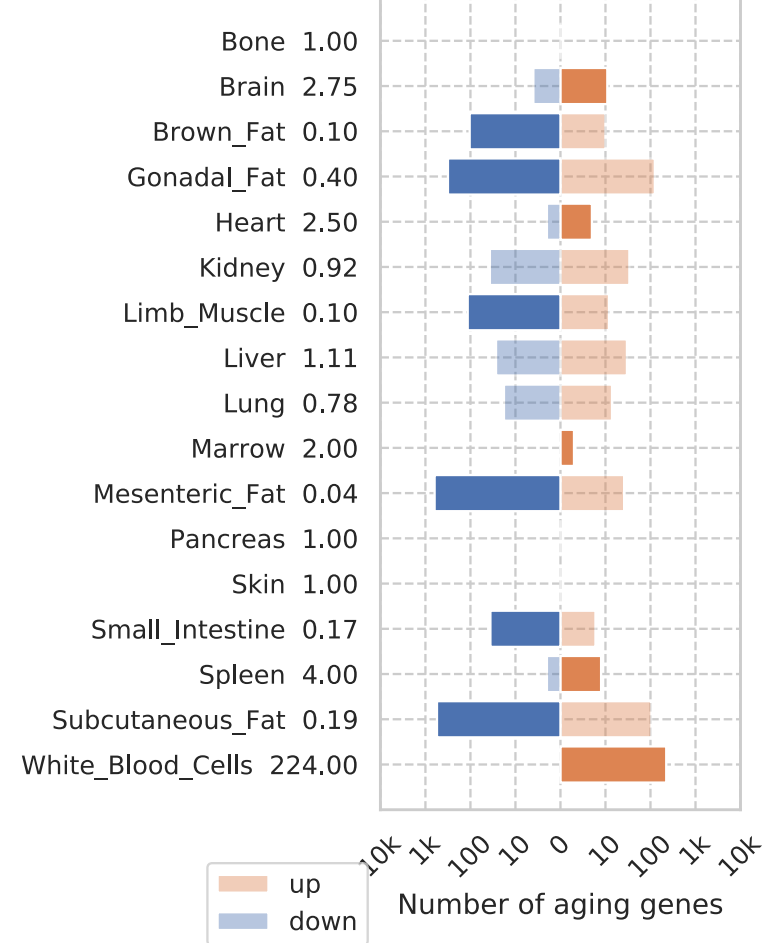**bulk data (tissue level)**

Supplement: supp [file elife-62293-supp-v1.zip]

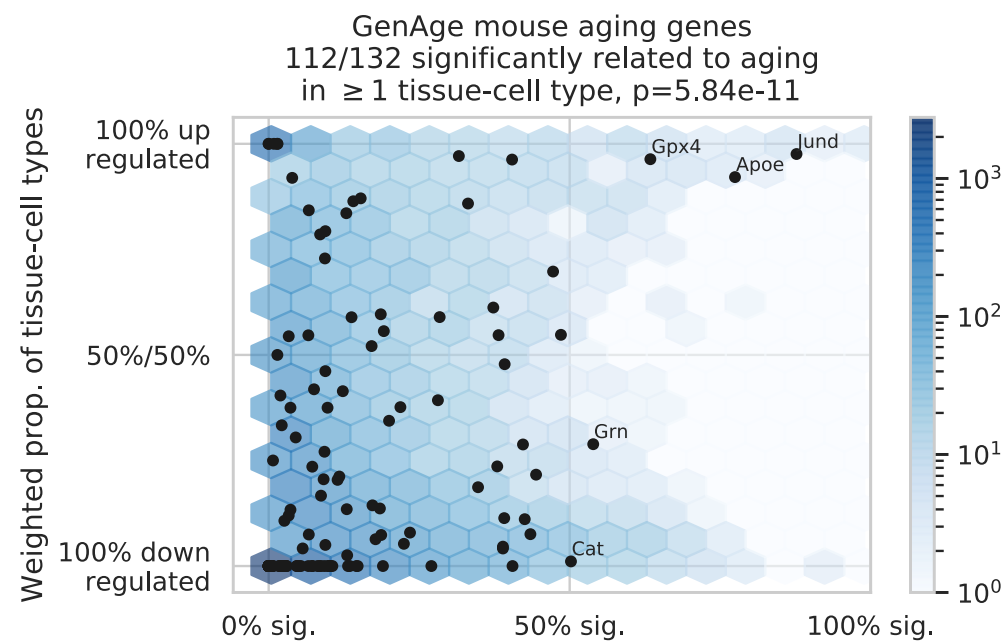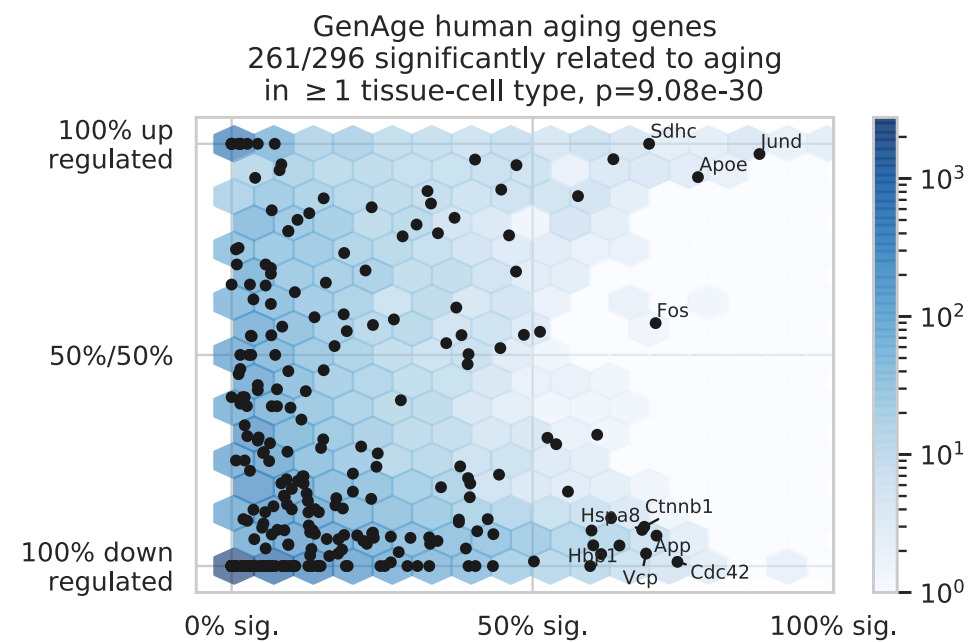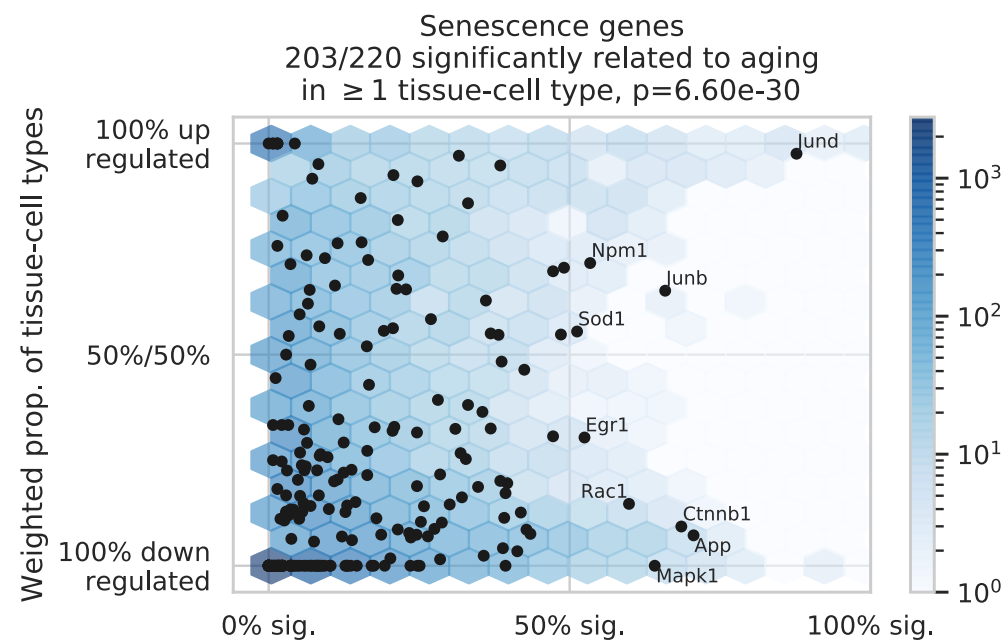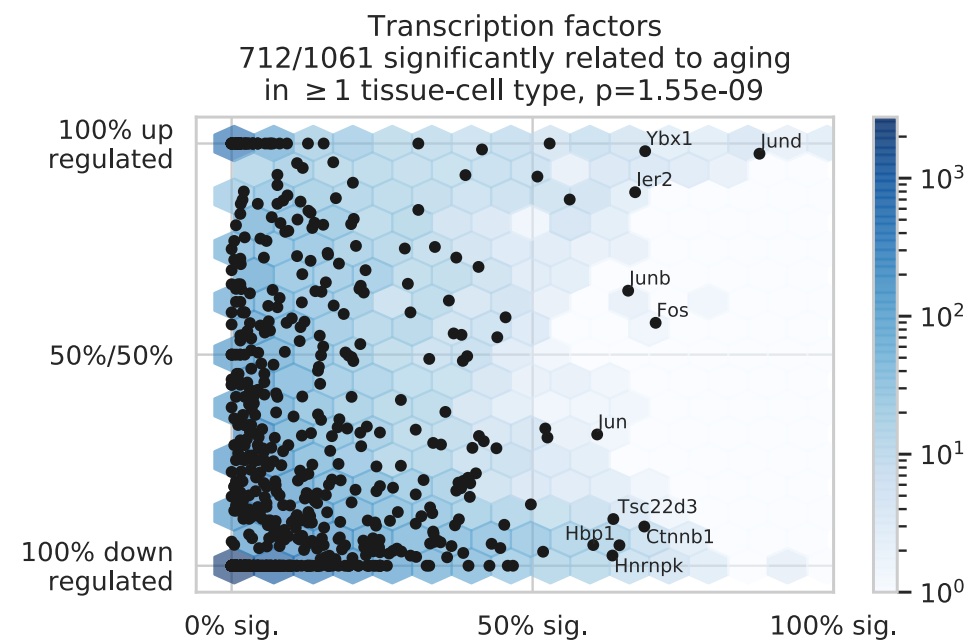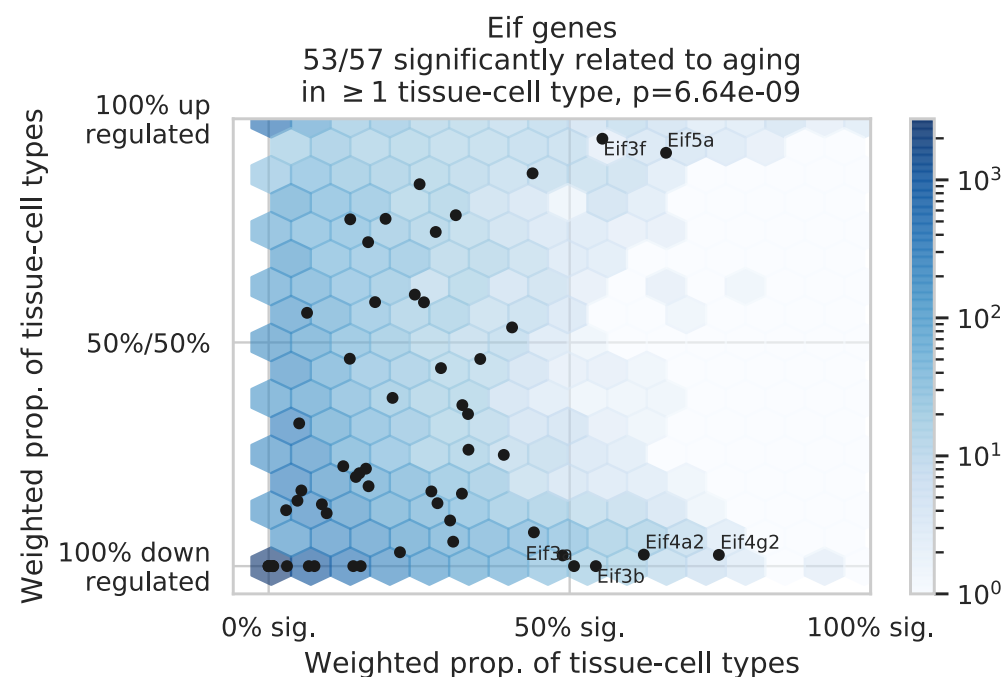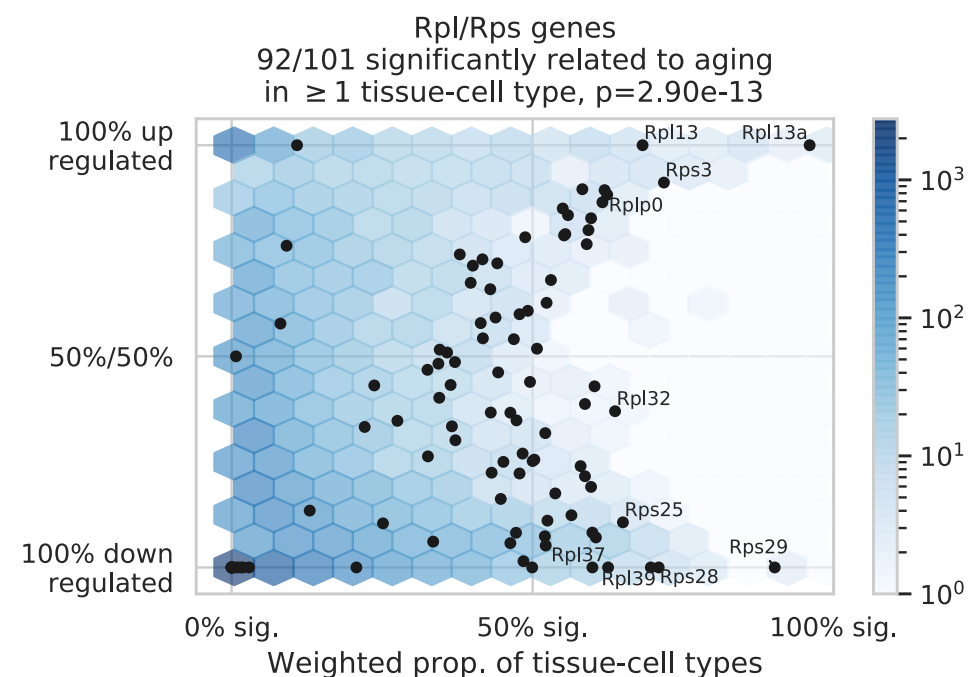

Supplement: supp [file elife-62293-supp-v1.zip]

**A**

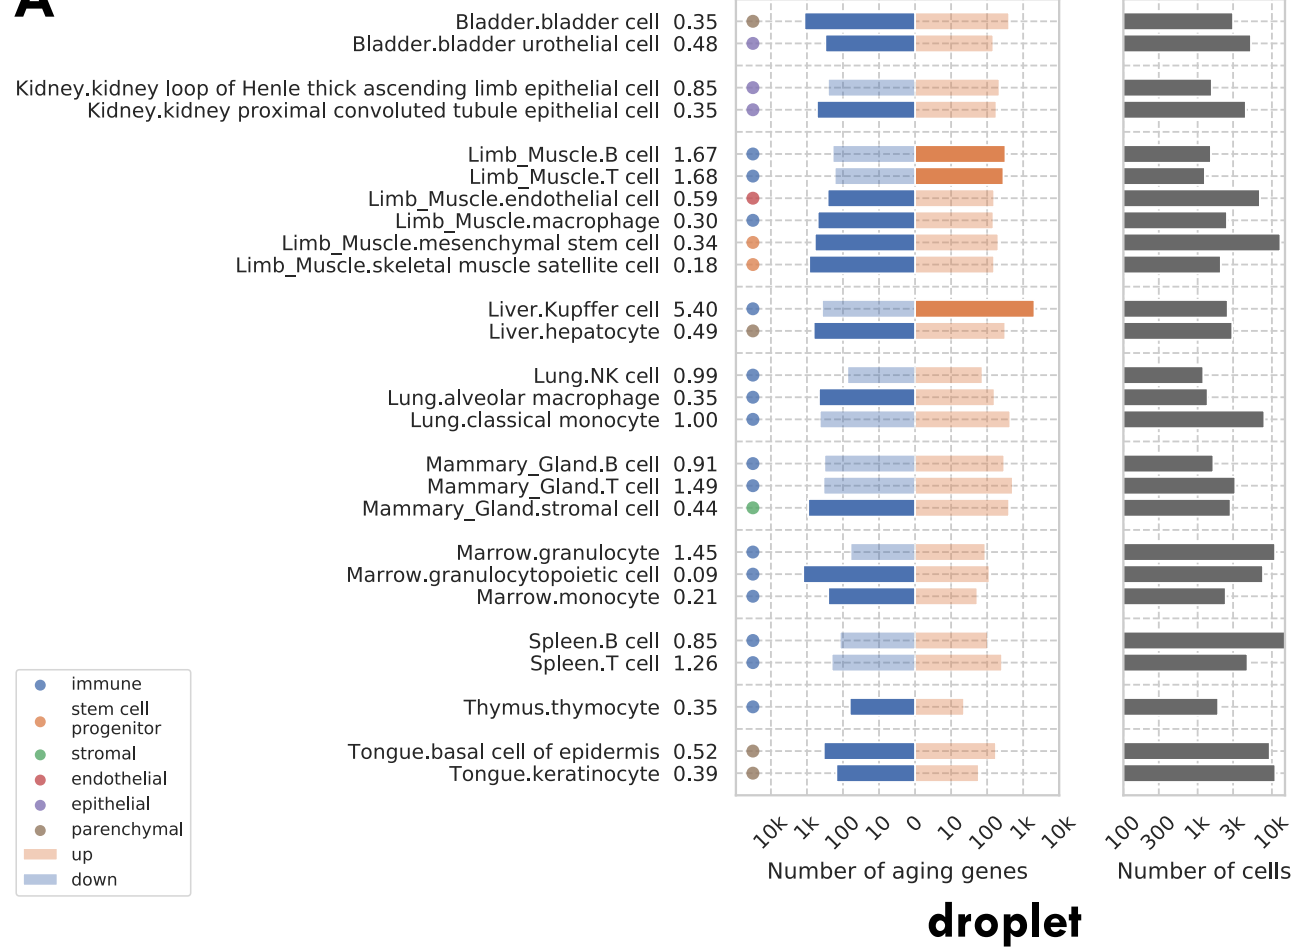

**B**

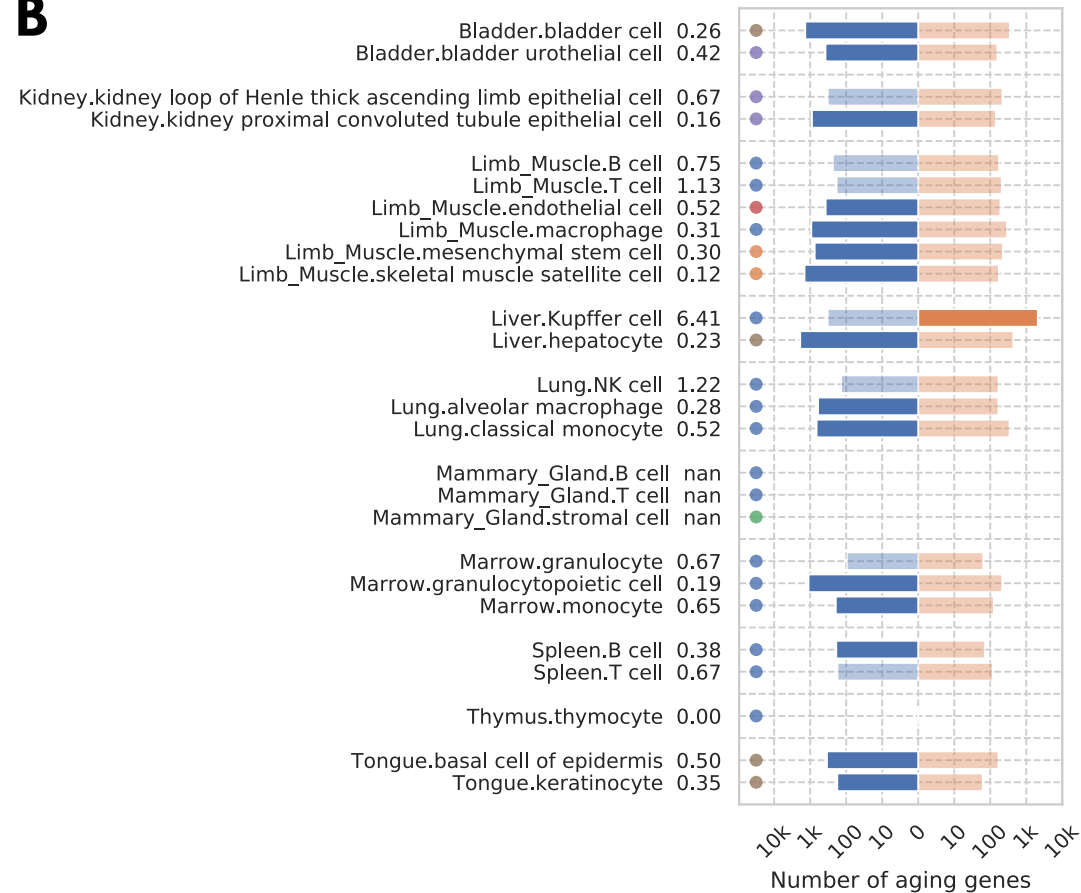

**C**

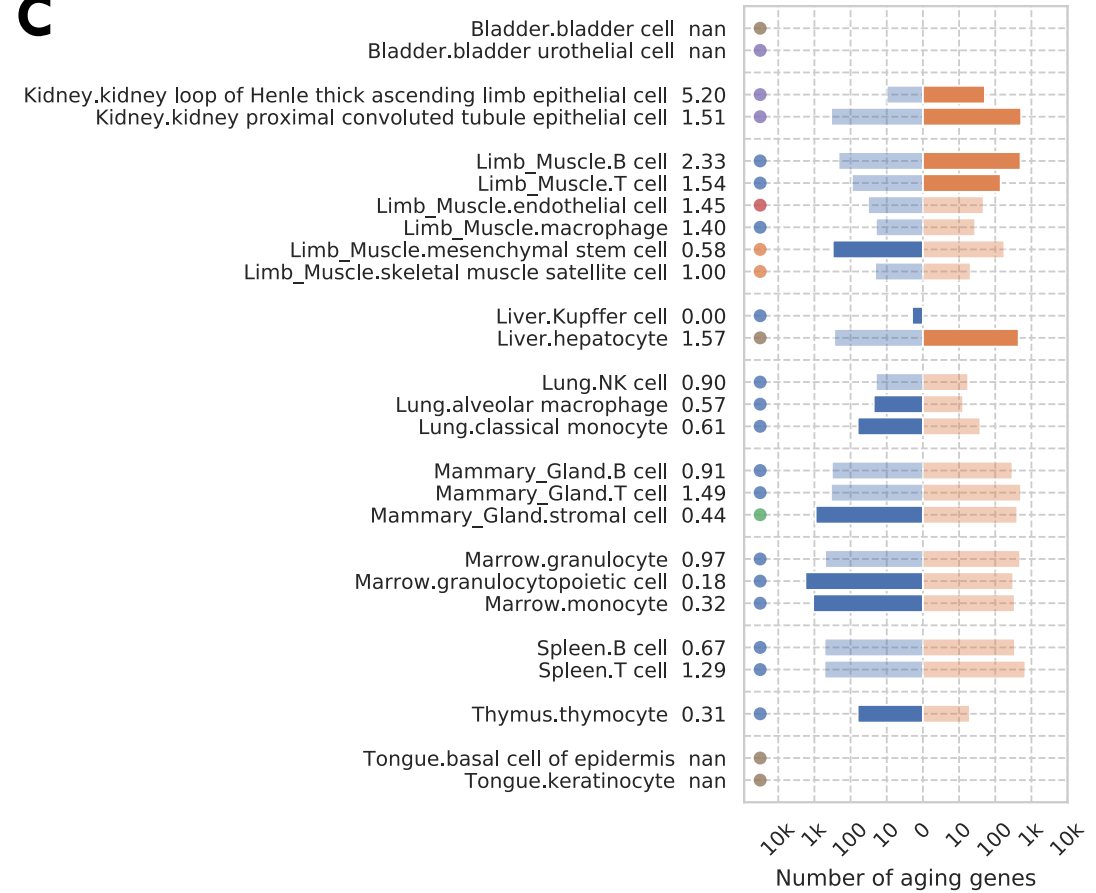

Supplement: supp [file elife-62293-supp-v1.zip]

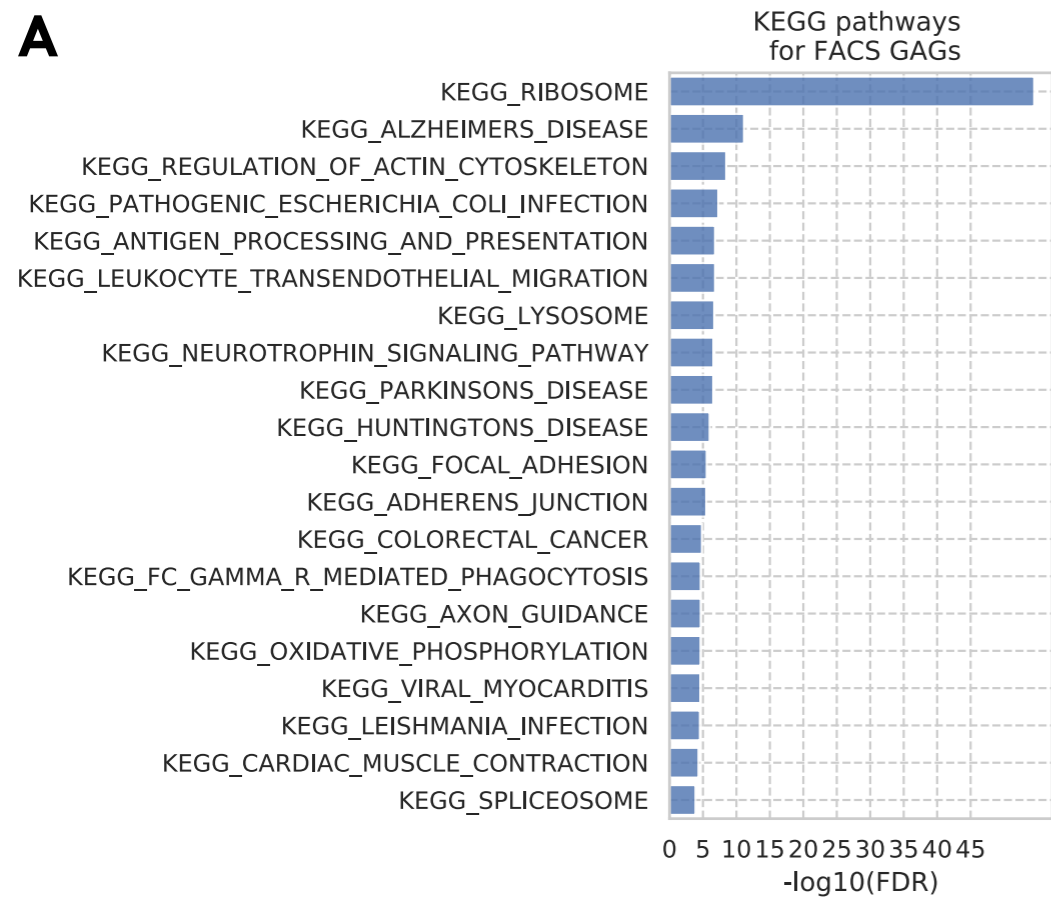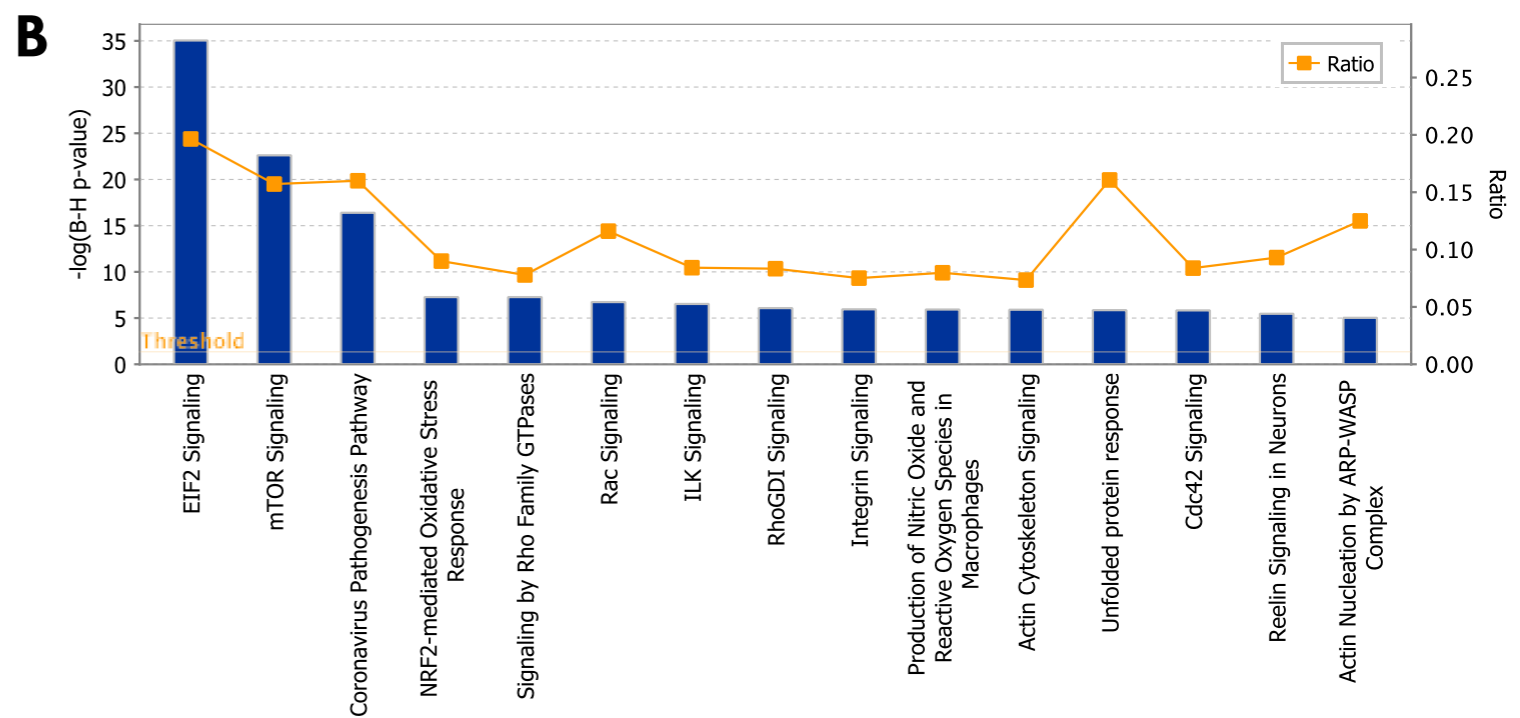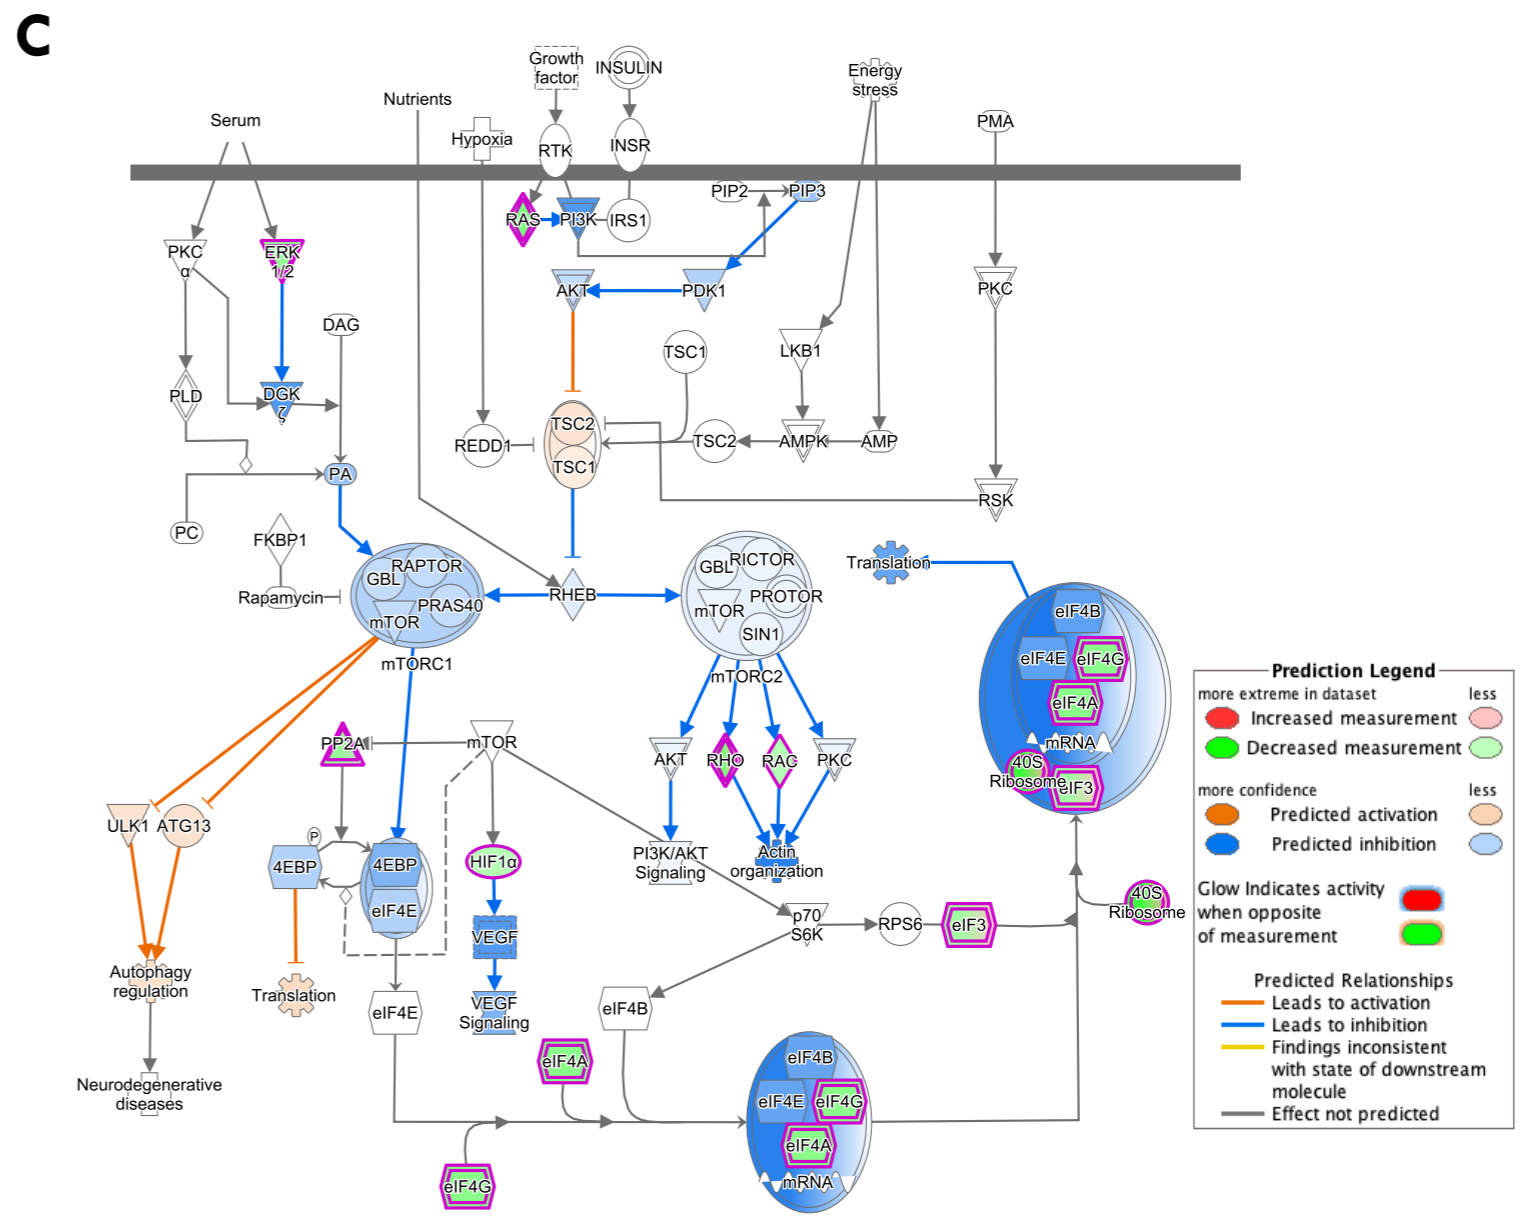

Supplement: supp [file elife-62293-supp-v1.zip › elife_poa_e62293_Figure_2_figure_supplement_3.pdf]

**A**

w, t\_sig=0.5, t\_dir=0.8

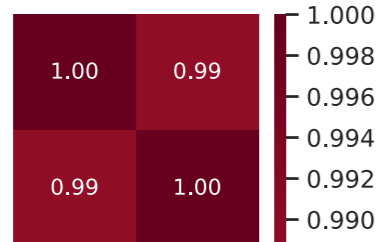**B**

uw, t\_sig=0.5, t\_dir=0.8

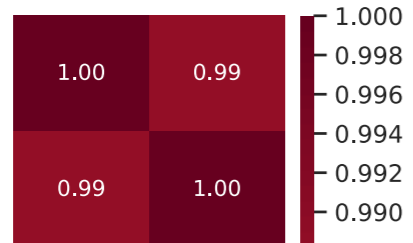**C**

w, t\_sig=0.5, t\_dir=0.6

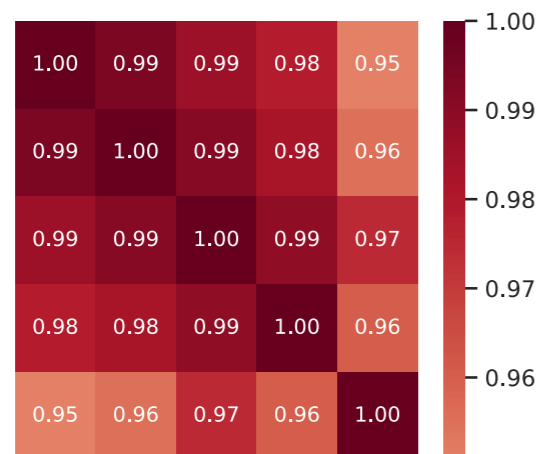**D**

w, t\_sig=0.4, t\_dir=0.8

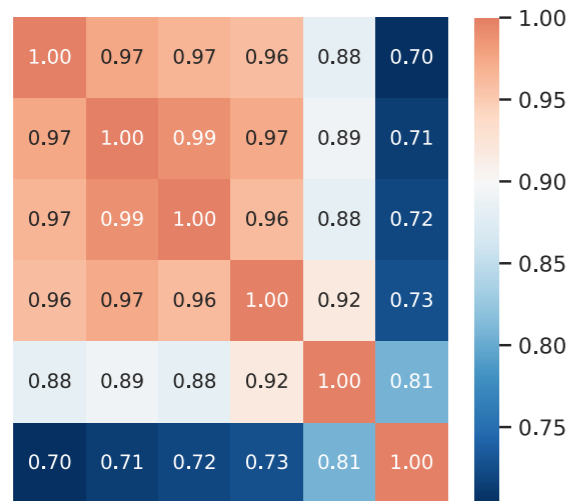**E**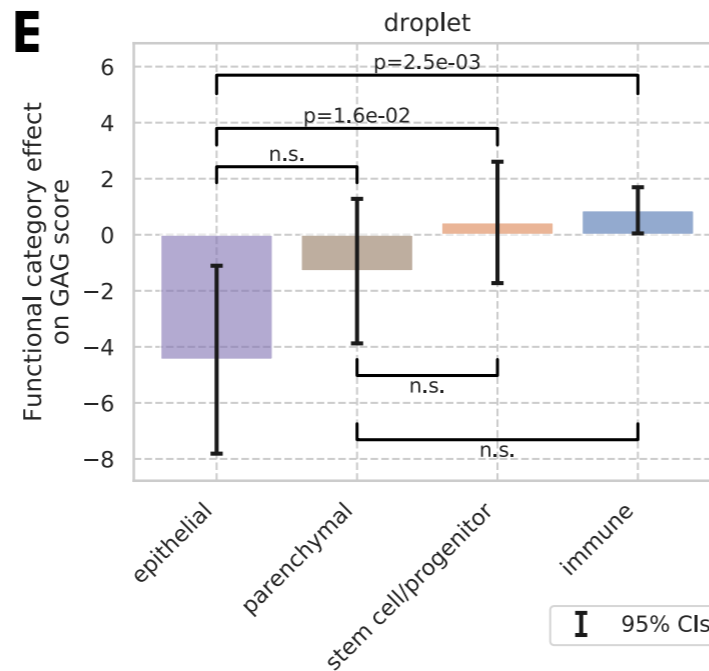**G**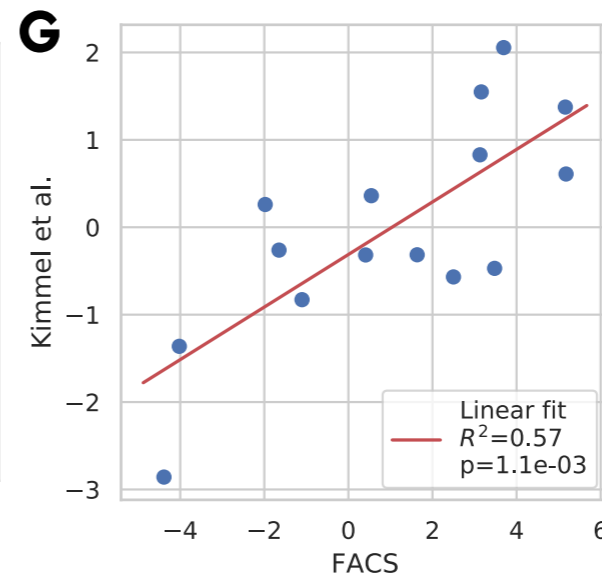**H**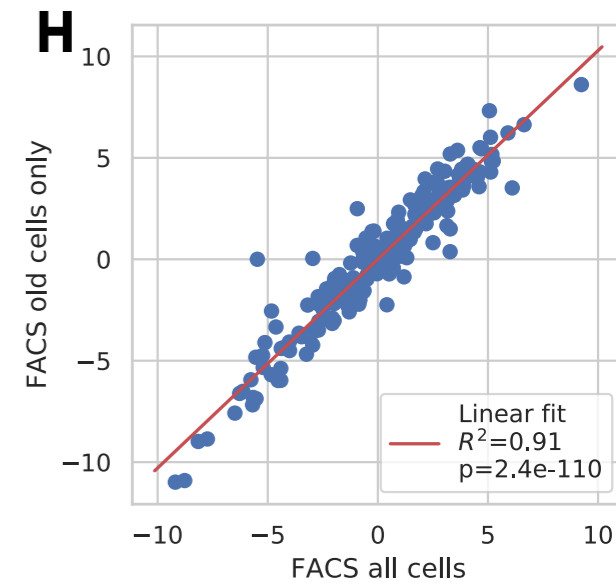**F**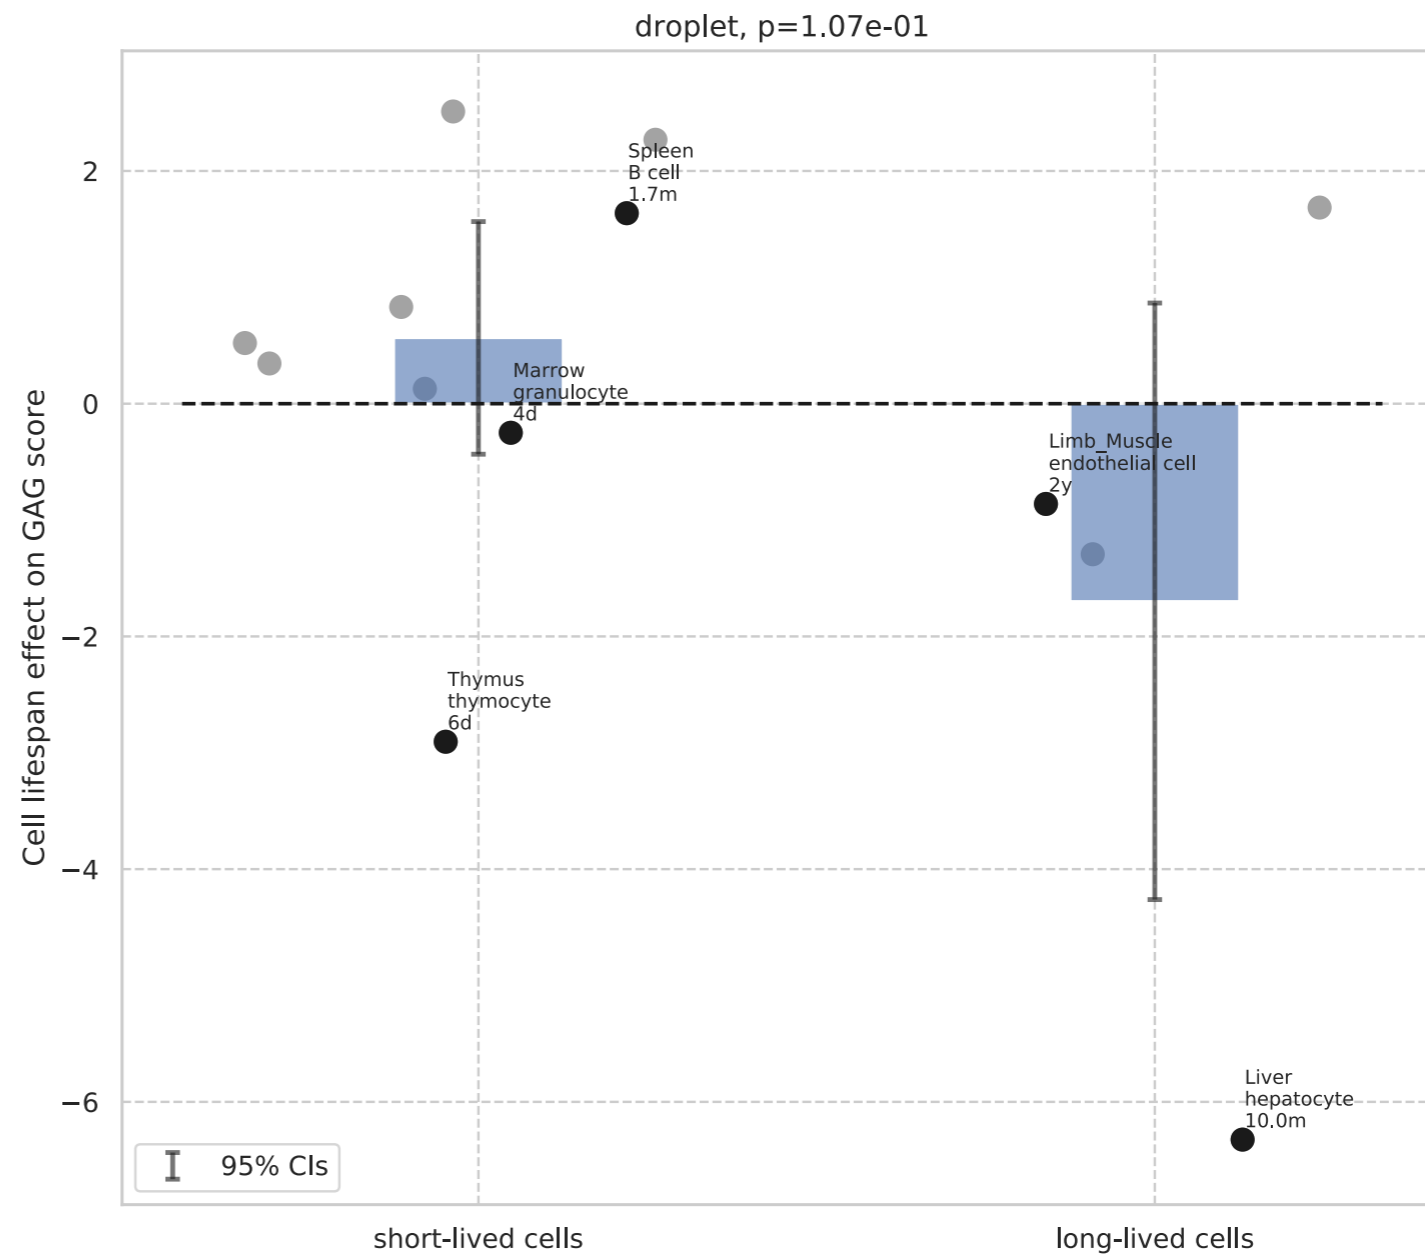

Supplement: supp [file elife-62293-supp-v1.zip › elife_poa_e62293_Figure_3_figure_supplement_3.pdf]
